# Supplementary material
Source: PubMed Central journal article supplement (PMC6462019)
Supplement: 41386_2018_155_MOESM2_ESM.pdf [file 41386_2018_155_MOESM2_ESM.pdf]

# CTX

| Amino acid | Localizatio | Position | nalf_pval | U50_pval | log2_nalf | log2_U50 | Protein  | Protein na            | Gene nam | Short sequence window |
|------------|-------------|----------|-----------|----------|-----------|----------|----------|-----------------------|----------|-----------------------|
| S          | 1           | 149      | 0.005316  | 0.002213 | -2.91602  | -3.1768  | Q9DCS2   | UPF0585 p0610011F     |          | YAVNGKISQSNVDF        |
| S          | 0.99993     | 211      | 0.030921  | 0.518768 | -1.62205  | -0.44023 | Q8R2R3   | Alpha- and Aagab      |          | HSEQQEPSPTAERTE       |
| T          | 0.999999    | 618      | 0.004484  | 0.613015 | -1.4438   | 0.205654 | Q3UHQ0   | AP2-associ Aak1       |          | GQKVGSLTPPSSPKT       |
| S          | 0.999287    | 1178     | 0.019527  | 0.057566 | 3.467151  | 2.301082 | Q80YE4   | Serine/thr Aatk       |          | VQEPSDESSEEP PAV      |
| S          | 1           | 2418     | 0.024757  | 0.121892 | -1.8137   | -1.00063 | P41234   | ATP-bindir Abca2      |          | TEDEGLISFEERAQ        |
| S          | 1           | 1327     | 0.89173   | 0.007686 | 0.39081   | -4.22995 | P41234   | ATP-bindir Abca2      |          | KVSEEDQSLNSEAD        |
| S          | 1           | 1331     | 0.839844  | 0.003106 | 0.39081   | -4.18085 | P41234   | ATP-bindir Abca2      |          | EDQSLNSEADVKES        |
| S          | 0.998174    | 657      | 0.010989  | 0.696774 | -1.03232  | -0.15311 | P21447   | Multidrug Abcb1a      |          | SSKDSGSSLIRRRST       |
| S          | 1           | 138      | 0.000694  | 0.003297 | -2.47225  | -1.57489 | Q6P542   | ATP-bindir Abcf1      |          | EALIQQDSEEEEEEE       |
| S          | 1           | 103      | 0.036371  | 0.188021 | 1.771014  | 0.915035 | Q6P542   | ATP-bindir Abcf1      |          | MERLKLQSLVPASDEE      |
| S          | 1           | 107      | 0.036371  | 0.188021 | 1.771014  | 0.915035 | Q6P542   | ATP-bindir Abcf1      |          | KQLSVPASDEEDEV P      |
| S          | 0.999999    | 904      | 0.39069   | 0.033273 | -0.67816  | -1.57624 | P00520-3 | Tyrosine-p Abl1       |          | KAGKPAQSPSQEAGE       |
| S          | 1           | 499      | 0.006561  | 0.92371  | -1.93565  | -0.11409 | Q8K4G5   | Actin-bind Ablim1     |          | HRSTSQGSINSVPVYS      |
| S          | 0.867417    | 496      | 0.00305   | 0.713154 | -2.85927  | -0.30366 | Q8BL65-4 | Actin-bind Ablim2     |          | RRLDVEDSSFDQDSR       |
| S          | 0.999609    | 365      | 0.009581  | 0.174951 | -1.38597  | -0.52426 | Q8BL65   | Actin-bind Ablim2     |          | YKQCRSTSSPSSAGSV      |
| S          | 1           | 383      | 0.020403  | 0.531077 | 2.18262   | -0.51949 | Q8BL65   | Actin-bind Ablim2     |          | HYTPTRSRPQHYSRP       |
| S          | 0.999609    | 376      | 0.009581  | 0.174951 | -1.38597  | -0.52426 | Q8BL65-4 | Actin-bind Ablim2     |          | YKQCRSTSSPSSAGSV      |
| S          | 1           | 394      | 0.020403  | 0.531077 | 2.18262   | -0.51949 | Q8BL65-4 | Actin-bind Ablim2     |          | HYTPTRSRPQHYSRP       |
| S          | 0.999902    | 521      | 0.005449  | 0.97578  | -2.4645   | 0.076675 | Q6ZQK5   | Arf-GAP wi Acap2      |          | DYKSFALLSPSEQEKR      |
| S          | 0.999999    | 825      | 0.006563  | 0.089157 | -1.68135  | -0.74517 | Q9JIX8   | Apoptotic Acin1       |          | KSFKRKISVVSATKG       |
| S          | 1           | 455      | 0.014062  | 0.651105 | -0.83767  | -0.14524 | Q3V117   | ATP-citrate Acly      |          | PAPSRATSFSESRAD       |
| S          | 1           | 1295     | 0.019075  | 0.016653 | -2.8315   | -2.62141 | P51830   | Adenylate Adcy9       |          | SDKASLGSDDSTQAK       |
| S          | 1           | 1292     | 0.00977   | 0.198744 | -2.95765  | -1.06489 | P51830   | Adenylate Adcy9       |          | VQYSDKASLGSDDST       |
| S          | 0.999809    | 12       | 0.027864  | 0.24956  | -1.19723  | 0.505774 | Q9QYCO   | Alpha-add Add1        |          | TRAAVVTSPPTTAP        |
| S          | 0.998507    | 555      | 0.031481  | 0.159886 | -1.7934   | -0.95192 | E9Q1K3   | Add1                  |          | GLAEQTFSPA KSVSF      |
| S          | 0.999992    | 613      | 0.029295  | 0.005151 | 1.721194  | 2.362786 | Q9QYCO-2 | Alpha-add Add1        |          | AVPNTPPSTPVKLEE       |
| S          | 1           | 629      | 0.038311  | 0.408523 | 1.147108  | 0.398338 | E9Q1K3   | Add1                  |          | TREQKEKSPPDQSAV       |
| S          | 1           | 600      | 0.038311  | 0.408523 | 1.147108  | 0.398338 | Q9QYCO-2 | Alpha-add Add1        |          | TREQKEKSPPDQSAV       |
| S          | 1           | 600      | 0.038311  | 0.408523 | 1.147108  | 0.398338 | Q9QYCO   | Alpha-add Add1        |          | TREQKEKSPPDQSAV       |
| T          | 0.999968    | 639      | 0.040208  | 0.405335 | 1.147108  | 0.405975 | E9Q1K3   | Add1                  |          | DQSAVPNTPPSTPVK       |
| T          | 0.999996    | 643      | 0.003076  | 0.016601 | 1.037548  | 0.623644 | E9Q1K3   | Add1                  |          | VPNTPPSTPVKLEEG       |
| T          | 0.999968    | 610      | 0.040208  | 0.405335 | 1.147108  | 0.405975 | Q9QYCO-2 | Alpha-add Add1        |          | DQSAVPNTPPSTPVK       |
| T          | 0.999996    | 614      | 0.003076  | 0.016601 | 1.037548  | 0.623644 | Q9QYCO-2 | Alpha-add Add1        |          | VPNTPPSTPVKLEEA       |
| T          | 0.999993    | 610      | 0.040208  | 0.405335 | 1.147108  | 0.405975 | Q9QYCO   | Alpha-add Add1        |          | DQSAVPNTPPSTPVK       |
| T          | 0.999998    | 614      | 0.003076  | 0.016601 | 1.037548  | 0.623644 | Q9QYCO   | Alpha-add Add1        |          | VPNTPPSTPVKLEED       |
| S          | 1           | 692      | 0.00168   | 0.77615  | -1.09211  | 0.086945 | Q9QYB8   | Beta-addu Add2        |          | NVDSGPLSPGSPSK        |
| S          | 1           | 678      | 0.927136  | 0.014109 | -0.30736  | -3.55683 | Q9QYB8   | Beta-addu Add2        |          | SADTDGDSYKDKTES       |
| S          | 1           | 594      | 0.003976  | 0.157126 | 1.58945   | 0.511675 | Q9QYB8   | Beta-addu Add2        |          | IATEKPGSPVKSTPA       |
| S          | 1           | 598      | 0.003287  | 0.015906 | 1.444002  | 0.890469 | Q9QYB8   | Beta-addu Add2        |          | KPGSPVKSTPASPVQ       |
| S          | 0.999984    | 677      | 0.007933  | 0.933896 | -1.41861  | 0.081027 | Q9QYB5   | Gamma-ac Add3         |          | EVLSPDGSPSKSPSK       |
| S          | 0.987444    | 680      | 0.046176  | 0.082117 | -2.57529  | -1.9316  | Q80WT5   | Aftiphilin Aftph      |          | HLLETHSSPAKTREA       |
| S          | 0.832519    | 349      | 0.022123  | 0.2524   | 1.160231  | 0.458661 | Q3UHD9   | Arf-GAP wi Agap2      |          | ISGIFTKSTGGPPGP       |
| S          | 1           | 974      | 0.037311  | 0.948603 | 0.724276  | 0.053754 | Q8K3E5   | Jouberin Ahi1         |          | PPKVKERSPLTPKE        |
| T          | 1           | 978      | 0.037311  | 0.948603 | 0.724276  | 0.053754 | Q8K3E5   | Jouberin Ahi1         |          | KERSPLTPKEKTKP        |
| S          | 1           | 52       | 0.026751  | 0.998953 | -1.62504  | -0.01539 | O88845   | A-kinase ai Akap10    |          | KASVAVHSPQKSTKN       |
| S          | 0.997369    | 281      | 0.002227  | 0.632578 | -2.01388  | -0.23616 | O88845   | A-kinase ai Akap10    |          | GSRNSCSSPLRELSE       |
| S          | 1           | 467      | 0.015185  | 0.013876 | -2.89332  | -2.64652 | Q9WTQ5   | A-kinase ai Akap12    |          | HTQLTDLSPPEEKMLP      |
| S          | 1           | 613      | 0.886846  | 0.001637 | -0.20178  | -3.02272 | Q9WTQ5   | A-kinase ai Akap12    |          | KKRVRPSESDKEEE        |
| S          | 0.999137    | 234      | 0.700961  | 0.029689 | 0.693165  | -2.92908 | Q9WTQ5   | A-kinase ai Akap12    |          | GTLKQAQSSTEIPLQ       |
| S          | 1           | 682      | 0.155039  | 0.013083 | 0.940021  | -1.75559 | Q9WTQ5   | A-kinase ai Akap12    |          | KKRARKASSSDDEGG       |
| S          | 0.99999     | 36       | 0.021129  | 0.889597 | -2.20653  | 0.211451 | A2API8   | Akap2;Pak             |          | EPAASSLSPDHKNME       |
| S          | 1           | 251      | 0.006492  | 0.53395  | -1.41129  | 0.25271  | D3YVF0   | A-kinase ai Akap5     |          | LESSAAGSPRSVTS        |
| S          | 1           | 22       | 0.011566  | 0.151196 | -1.15035  | -0.48283 | D3YVF0   | A-kinase ai Akap5     |          | EKGVAASPVKTERQE       |
| S          | 0.996543    | 124      | 0.999928  | 0.046323 | 0.003403  | -0.85305 | P31750   | RAC-alpha Akt1        |          | TMDFRSGSPSDNSGA       |
| S          | 0.999876    | 39       | 0.020114  | 0.481426 | -1.48607  | -0.38385 | P05064   | Fructose-b Aldoa;Aldc |          | AADESTGSI AKRLQS      |
| S          | 1           | 477      | 0.006658  | 0.048908 | 2.25848   | 1.210051 | Q920R0   | Alsin Als2            |          | EGGSRRLSLPGLLSQ       |
| S          | 1           | 486      | 0.006658  | 0.048908 | 2.25848   | 1.210051 | Q920R0   | Alsin Als2            |          | PGLLSQVSPRLLRKA       |
| S          | 1           | 227      | 0.017297  | 0.735047 | -1.97983  | -0.3009  | Q8CCJ4   | APC memt Amer2        |          | LPGSLTASLECVKEE       |
| S          | 1           | 262      | 0.013869  | 0.980862 | -5.39904  | -0.18617 | Q7TQF7   | Amphiphy: Amph        |          | LRIAKTPSPPEESP        |

|   |          |      |          |          |          |          |          |                          |                  |
|---|----------|------|----------|----------|----------|----------|----------|--------------------------|------------------|
| S | 0.994496 | 779  | 0.016616 | 0.131146 | -4.14113 | -2.00705 | Q91W96   | Anaphase- Anapc4         | KEEVLESETEAHQD   |
| S | 1        | 3357 | 0.005267 | 0.569101 | -1.76741 | -0.28328 | S4R291   | Ankyrin-2 Ank2           | KCPVKARSYIETETE  |
| S | 1        | 2212 | 0.020859 | 0.909034 | -1.88134 | 0.161703 | S4R291   | Ankyrin-2 Ank2           | LSFSPKSEEQIGEA   |
| S | 1        | 1925 | 0.02543  | 0.869324 | -1.61256 | 0.178097 | S4R291   | Ankyrin-2 Ank2           | HEKHLPLVSPGKTEKQ |
| S | 1        | 2491 | 0.007864 | 0.756242 | -1.9258  | -0.22909 | S4R291   | Ankyrin-2 Ank2           | SSGKSPLSPDTPSSE  |
| S | 0.999965 | 886  | 0.011256 | 0.962544 | -1.36118 | 0.062868 | Q8C8R3-2 | Ankyrin-2 Ank2           | GMNYLRYSLLEGGRSD |
| S | 0.999999 | 8    | 0.005323 | 0.368802 | -2.21658 | -0.50224 | Q8C8R3-3 | Ankyrin-2 Ank2           | MTEVLVDVDEEGDDT  |
| S | 0.998132 | 890  | 0.011256 | 0.962544 | -1.36118 | 0.062868 | S4R291   | Ankyrin-2 Ank2           | GMNYLRYSLLEGGRSD |
| S | 1        | 31   | 0.008522 | 0.49044  | -0.87069 | 0.179188 | S4R291   | Ankyrin-2 Ank2           | KRPKSDSNASFLRA   |
| S | 1        | 7    | 0.010063 | 0.228397 | -3.04832 | -1.0383  | Q8C8R3-7 | Ankyrin-2 Ank2           | _MAHAAASIKKVREA  |
| S | 1        | 46   | 0.008522 | 0.49044  | -0.87069 | 0.179188 | Q8C8R3-7 | Ankyrin-2 Ank2           | ERKRKSDSNASFLRA  |
| S | 1        | 10   | 0.008522 | 0.49044  | -0.87069 | 0.179188 | S4R245   | Ankyrin-2 Ank2           | TMLQKSDSNASFLRA  |
| T | 0.994747 | 3713 | 7.98E-05 | 0.262007 | -5.16629 | 0.577271 | S4R291   | Ankyrin-2 Ank2           | QQEYVVTTPGAEVED  |
| T | 0.999985 | 2328 | 0.008519 | 0.965522 | -1.27226 | -0.05266 | S4R291   | Ankyrin-2 Ank2           | SETQESLTPSEVTKP  |
| S | 0.996941 | 2159 | 0.04464  | 0.93665  | 0.951805 | -0.08294 | S4R291   | Ankyrin-2 Ank2           | QSGALGGSSSELKQE  |
| S | 0.996422 | 2162 | 0.04464  | 0.93665  | 0.951805 | -0.08294 | S4R291   | Ankyrin-2 Ank2           | ALGGSSSELKQEVIA  |
| S | 0.936215 | 2653 | 0.022615 | 0.147881 | 6.696935 | 3.356246 | S4R291   | Ankyrin-2 Ank2           | PPSPLPSSIDSNSSP  |
| S | 1        | 3759 | 0.000396 | 0.75353  | -6.05082 | 0.375455 | S4R291   | Ankyrin-2 Ank2           | PVTSERGSPVQPEPE  |
| S | 1        | 967  | 0.03707  | 0.962757 | -1.19824 | -0.07511 | S4R2K9   | Ankyrin-3 Ank3           | TRFSDSLRHYSWA    |
| S | 0.998819 | 2041 | 0.098296 | 0.047474 | 1.697529 | 1.906858 | Q99NH0   | Ankyrin re Ankrd17       | YPVSSPSPSPAQP    |
| S | 0.978858 | 634  | 0.008965 | 0.5586   | -1.26788 | -0.23455 | Q3UMR0   | Ankyrin re Ankrd27       | PSEVPAQSPTRSVDS  |
| S | 1        | 260  | 0.028641 | 0.400868 | -0.71256 | -0.23145 | Q3UUF8   | Ankyrin re Ankrd34b      | KHQARVASLQEELQD  |
| S | 1        | 272  | 0.00432  | 0.632563 | -2.14011 | -0.29111 | Q9JME5   | AP-3 comp Ap3b2          | PEKAFYGSSEDEAKG  |
| S | 1        | 282  | 0.005979 | 0.745329 | -1.07624 | 0.123417 | Q9JME5   | AP-3 comp Ap3b2          | DEAKGPGSEEAATAA  |
| S | 1        | 760  | 0.008539 | 0.928013 | -0.81787 | -0.04973 | O54774   | AP-3 comp Ap3d1          | HSSLPTESDEDIAPA  |
| S | 1        | 317  | 0.024387 | 0.932346 | -0.87155 | -0.06661 | B2RUJ5   | Amyloid b $\alpha$ Apba1 | PGGGHPDPSGLPAPA  |
| S | 0.999714 | 84   | 0.016366 | 0.139242 | -2.42723 | -1.14587 | B2RUJ5   | Amyloid b $\alpha$ Apba1 | ECLARSASTESGFHN  |
| S | 0.999994 | 573  | 0.592813 | 0.022313 | 0.233296 | -0.85587 | B2RUJ5   | Amyloid b $\alpha$ Apba1 | RRMPRSNSQENVEAS  |
| S | 0.999965 | 289  | 0.574312 | 0.037876 | 0.568089 | -1.74696 | B2RUJ5   | Amyloid b $\alpha$ Apba1 | KQSMSSQSLDKAAED  |
| S | 0.999984 | 2710 | 0.037746 | 0.999008 | -2.84235 | 0.028791 | B2RUG9   | Adenomat Apc             | KQSVGSGSPVQTVGL  |
| S | 1        | 108  | 0.0138   | 0.324612 | -3.64997 | -1.12051 | Q9Z1K7   | Adenomat Apc2            | AARTPEGSPVHGSGP  |
| S | 1        | 187  | 0.042134 | 0.962485 | -2.33559 | 0.152356 | Q8R146   | Acylamino Apeh           | KALDVSASDEEMARP  |
| S | 1        | 276  | 0.696702 | 0.042838 | 0.298983 | -1.13058 | P55088   | Aquaporin Aqp4           | AAQQTKGSYMVEEDN  |
| S | 1        | 285  | 0.696702 | 0.042838 | 0.298983 | -1.13058 | P55088   | Aquaporin Aqp4           | MEVEDNRSQVETEDL  |
| S | 0.99122  | 1550 | 0.03174  | 0.480025 | -1.67515 | -0.48934 | G3X9K3   | Brefeldin / Arfgef1      | SGEAEPSPSAVSEK   |
| T | 0.928318 | 623  | 0.973562 | 0.024505 | -0.17282 | -2.94146 | A2A5R2   | Brefeldin / Arfgef2      | MARRCSVTSVESTVS  |
| S | 0.998395 | 314  | 0.009374 | 0.957719 | -2.08319 | -0.09801 | Q6DFV3   | Rho GTPas Arhgap21       | KAASRTTSPASVPTA  |
| S | 0.999229 | 1108 | 0.004644 | 0.580881 | -3.29846 | -0.50277 | Q6DFV3   | Rho GTPas Arhgap21       | LLSKDDTSPPKDKGT  |
| S | 1        | 874  | 0.01907  | 0.392312 | -1.53139 | -0.45368 | Q6DFV3   | Rho GTPas Arhgap21       | SKTERSRSYDEGLDD  |
| S | 1        | 1092 | 0.040244 | 0.121425 | -2.44444 | -1.54169 | Q6DFV3   | Rho GTPas Arhgap21       | PKTQSPHSPKEESER  |
| S | 0.999998 | 426  | 0.009269 | 0.30482  | -1.57732 | 0.455367 | B1AQY2   | Rho GTPas Arhgap23       | YIGYRSYSPSQRRRT  |
| S | 1        | 644  | 0.018537 | 0.586783 | 1.110473 | 0.233444 | B1AQY2   | Rho GTPas Arhgap23       | RVLRRLSRVPSLRV   |
| S | 1        | 648  | 0.018537 | 0.586783 | 1.110473 | 0.233444 | B1AQY2   | Rho GTPas Arhgap23       | RLPSRVPSLRVLSF   |
| S | 0.999193 | 850  | 0.021715 | 0.493034 | -0.82333 | 0.212664 | A6X8Z5   | Rho GTPas Arhgap31       | NKGPGPLPSPTKEVDI |
| S | 1        | 1823 | 0.038333 | 0.669549 | -1.39252 | -0.30251 | Q811P8   | Rho GTPas Arhgap32       | RHPAKAVSPEGDERF  |
| S | 0.999294 | 830  | 0.018882 | 0.538253 | -3.95208 | 0.910615 | Q811P8   | Rho GTPas Arhgap32       | GYTRDKLSPSKKDAE  |
| S | 0.997274 | 871  | 0.003095 | 0.569758 | -2.25852 | -0.32049 | Q811P8   | Rho GTPas Arhgap32       | PFFTLDLSPDCKSS   |
| S | 1        | 597  | 0.009427 | 0.709368 | -1.41901 | 0.197222 | P59281   | Rho GTPas Arhgap39       | GPVVRAFSEDEALAQ  |
| S | 1        | 931  | 0.010141 | 0.407863 | -1.09595 | -0.27041 | Q60875   | Rho guanir Arhgef2       | REAQELGSPEDRLQD  |
| S | 1        | 697  | 0.000962 | 0.071528 | -1.64467 | 0.510661 | E9QAQ7   | AT-rich int Arid1a       | LPGIRGSPSPVGGSP  |
| S | 0.810603 | 246  | 0.022818 | 0.848926 | -0.95824 | -0.11164 | Q9D7A8   | Armadillo Armc1          | DYLPEDESPTKEQDK  |
| S | 1        | 67   | 0.010038 | 0.988577 | -2.13337 | -0.05236 | P60840   | cAMP-regu Arpp19;En      | KGQKYFDSGDYNNMAK |
| S | 1        | 32   | 0.014317 | 0.851141 | -0.93349 | -0.09579 | Q9DCB4   | cAMP-regu Arpp21         | NGILKSELDDEEEK   |
| T | 0.77221  | 852  | 0.015458 | 0.197272 | -2.32997 | -0.94173 | Q9QWY8   | Arf-GAP wi Asap1         | PPPGHKRTLSDPPSP  |
| S | 1        | 704  | 0.00236  | 0.408114 | -3.59795 | -0.63476 | Q7SIG6   | Arf-GAP wi Asap2         | LHEDLDESDDVDDEK  |
| S | 0.999733 | 317  | 0.006593 | 0.371255 | 1.277843 | 0.302988 | G3X963   | Atad2                    | RPRFRLSSTGPRSPY  |
| S | 1        | 828  | 0.034694 | 0.910191 | -1.2478  | -0.12199 | Q3ZAQ4   | Atg9a                    | EPVPEEGSEDELPPQ  |
| S | 1        | 58   | 0.02456  | 0.933905 | -1.41809 | -0.10725 | Q6PIE5   | Sodium/pc Atp1a2         | RKYQVDLSKGLTNQR  |
| S | 0.999552 | 442  | 0.028551 | 0.058959 | -1.54982 | -1.12816 | Q6PIC6   | Sodium/pc Atp1a3         | RDVAGDASESALLKC  |
| S | 1        | 218  | 0.021578 | 0.927224 | -0.75256 | -0.0579  | Q6PIC6   | Sodium/pc Atp1a3         | ESEPQTRSPDCTHDN  |

|   |          |      |          |          |          |          |          |                       |                   |
|---|----------|------|----------|----------|----------|----------|----------|-----------------------|-------------------|
| S | 0.999997 | 663  | 0.001079 | 0.485457 | -1.35042 | 0.176271 | O55143   | Sarcoplasn Atp2a2     | EFDELSPAQRDACL    |
| T | 1        | 1165 | 0.019906 | 0.963823 | -3.94992 | 0.206594 | G5E829   | Plasma me Atp2b1      | HIPLIDDTDAEDDAP   |
| S | 0.85441  | 19   | 0.003039 | 0.445525 | -3.27399 | -0.57359 | Q9R0K7   | Plasma me Atp2b2      | KNQRNESSHGGEFGC   |
| S | 1        | 1126 | 0.021354 | 0.710185 | -0.81105 | -0.13787 | A2ALL9   | Calcium-tr: Atp2b3    | STFKRSGSFQGA VRR  |
| S | 1        | 1134 | 0.023809 | 0.070543 | -1.26519 | -0.83044 | Q0VF55   | Calcium-tr: Atp2b3    | EGLEKPEKSCIHNF    |
| T | 1        | 45   | 0.008437 | 0.437128 | -3.89181 | -0.87461 | D3Z2Z6   | Atp8a2                | EDEMSRATSVGDQLE   |
| S | 0.980624 | 1467 | 0.001125 | 0.842664 | -1.40649 | 0.083328 | Q3UHD1   | Brain-spec Bai1;Adgrt | VATLSVSSLERRKSR   |
| S | 1        | 1220 | 0.01802  | 0.547419 | -1.07059 | -0.23986 | Q80ZF8   | Brain-spec Bai3;Adgrt | TGTLRSRLNNDDEEE   |
| S | 0.997186 | 54   | 0.005832 | 0.412464 | -1.82496 | -0.39209 | Q91XV3   | Brain acid : Basp1    | DATEVKESTEETPKD   |
| S | 0.978393 | 192  | 0.005606 | 0.979912 | -1.07024 | 0.030471 | Q91XV3   | Brain acid : Basp1    | AASEAPSSAAKAPAP   |
| T | 1        | 31   | 0.039542 | 0.997908 | -1.61201 | 0.024032 | Q91XV3   | Brain acid : Basp1    | KKAEGAGTEEEGTPK   |
| S | 1        | 1464 | 0.002163 | 0.760146 | -1.28884 | -0.11317 | Q9Z277   | Tyrosine-p Baz1b      | LADDEGDSDESVEVGQ  |
| S | 1        | 525  | 0.021966 | 0.517391 | -1.00735 | 0.250268 | Q80YN3   | Breast carc Bcas1     | NSVEKTPSPPEPEPA   |
| S | 1        | 615  | 0.246852 | 0.007447 | -1.05082 | -2.75107 | Q80YN3   | Breast carc Bcas1     | GLGPKRMSDAQVQTD   |
| S | 0.999997 | 360  | 0.037758 | 0.540116 | -2.87385 | -0.79396 | Q80YN3   | Breast carc Bcas1     | RHKDTE NSPTTSANL  |
| S | 1        | 271  | 0.021966 | 0.517391 | -1.00735 | 0.250268 | F7BNZ5   | Bcas1                 | NSVEKTPSPPEPEPA   |
| S | 1        | 177  | 0.000437 | 0.946035 | -1.52536 | 0.041341 | Q8K019   | Bcl-2-asso Bclaf1     | EGEPQEESPLKSKSQ   |
| S | 0.999999 | 656  | 0.001324 | 0.758195 | -2.32374 | 0.184237 | Q8K019   | Bcl-2-asso Bclaf1     | IHRRIDISPALRKH    |
| S | 1        | 646  | 0.017663 | 0.99664  | -2.22895 | 0.033995 | Q8K019   | Bcl-2-asso Bclaf1     | EHSTRQKSP EIHRR I |
| S | 1        | 636  | 0.03488  | 0.227817 | -1.51355 | -0.7098  | Q6PGF5   | Bms1                  | GQKPASESLVDHETSD  |
| S | 1        | 642  | 0.014538 | 0.36798  | -1.73597 | -0.50064 | Q6PGF5   | Bms1                  | ESLVDETSDIESLLK   |
| S | 1        | 119  | 0.030702 | 0.419911 | -1.58903 | -0.50924 | Q9Z2F7   | BCL2/aden Bnip3l      | SRDHSSQSEEEVVEG   |
| S | 1        | 135  | 0.998283 | 0.023915 | -0.03272 | 1.028614 | P28028   | Serine/thr: Braf      | ASRNNPKSPQKPIVR   |
| S | 1        | 519  | 0.000347 | 0.102333 | -3.14843 | -0.7001  | Q5RJI5   | Serine/thr: Brsk1     | SGGTPLHSP LHTPRA  |
| S | 1        | 3301 | 0.00549  | 0.87915  | -1.43357 | 0.104081 | O88737   | Protein ba: Bsn       | YGRGEESEEDSYDP    |
| S | 1        | 3382 | 0.013425 | 0.71489  | -0.98902 | 0.147925 | O88737   | Protein ba: Bsn       | EQKISKFSPIEEAKD   |
| S | 0.954332 | 2822 | 0.130472 | 0.022175 | -0.68457 | 1.047501 | O88737   | Protein ba: Bsn       | LLDTSFASSERLNKA   |
| S | 0.999959 | 2866 | 0.001559 | 0.970742 | -5.99063 | -0.15521 | O88737   | Protein ba: Bsn       | LSDPKPLSPTAEESA   |
| S | 1        | 249  | 0.007268 | 0.035057 | -2.74279 | -1.64879 | O88737   | Protein ba: Bsn       | PALSPAHS PAKQPLG  |
| T | 1        | 2595 | 0.001219 | 0.337322 | -1.27156 | 0.219274 | O88737   | Protein ba: Bsn       | IADSSVQTDDEEGEG   |
| S | 1        | 1100 | 0.038535 | 0.193886 | 1.37916  | 0.714711 | O88737   | Protein ba: Bsn       | AQRRRERSKT PPSNL  |
| S | 0.999982 | 1486 | 0.040489 | 0.982722 | 1.731757 | 0.075165 | O88737   | Protein ba: Bsn       | TGSSPPLSPSTPSES   |
| S | 0.982729 | 1493 | 0.03746  | 0.508458 | 1.364436 | 0.397404 | O88737   | Protein ba: Bsn       | SPSTPSESPTFSPGK   |
| S | 0.99998  | 464  | 0.619377 | 0.043306 | -0.2346  | -0.75532 | Q80X80   | C2 domain C2cd2l      | RVDGKLDSPSRSPSK   |
| S | 0.998557 | 466  | 0.008149 | 0.221741 | -3.64367 | -1.19634 | Q80X80   | C2 domain C2cd2l      | DGKLDSPSRSPSKVE   |
| S | 0.999995 | 396  | 0.004809 | 0.00063  | -2.51706 | -3.51411 | Q80X80   | C2 domain C2cd2l      | PGPGKSLSPAATVTA   |
| S | 1        | 411  | 0.004809 | 0.00063  | -2.51706 | -3.51411 | Q80X80   | C2 domain C2cd2l      | ELHYEQSGSPRNLTGP  |
| S | 0.999971 | 659  | 0.047651 | 0.117663 | -2.80597 | -1.87866 | Q7TPS5   | C2 domain C2cd5       | SRLLSQSGSESDVET   |
| S | 0.999962 | 1130 | 0.034072 | 0.799407 | -4.93653 | -0.7555  | E9Q5L4   | Uncharact: C530008M   | PVLQSRHSLD GSKVT  |
| S | 1        | 2303 | 0.016421 | 0.982267 | -2.8747  | -0.09947 | P97445   | Voltage-de Cacna1a    | ADYTEPDSPREPPGG   |
| S | 1        | 15   | 0.056314 | 0.024823 | -1.04226 | -1.17259 | Q61290   | Voltage-de Cacna1e    | VVVGPRPGSGDGDSDQ  |
| S | 1        | 2054 | 0.001008 | 0.294512 | -1.78029 | -0.31807 | Q61290   | Voltage-de Cacna1e    | KERKHLLSPDV SRCN  |
| S | 0.999968 | 152  | 0.487112 | 0.021235 | -0.62868 | -1.93877 | P54285   | Voltage-de Cacnb3     | GDIGNRRSPPPSLAK   |
| S | 1        | 248  | 0.021037 | 0.997178 | -0.78587 | 0.011484 | Q9JJV5   | Voltage-de Cacng3     | EPRSRDLSPISKGFH   |
| S | 1        | 1859 | 0.070964 | 0.046672 | -2.11857 | -2.14995 | B2RQC6   | CAD protei Cad        | PPRIHRASDPGLPAE   |
| S | 1        | 96   | 0.206028 | 0.041449 | 1.16527  | 1.809636 | Q80TJ1   | Calcium-d: Cadps      | SPSPSVVSEKEKEEL   |
| S | 0.927414 | 275  | 0.001078 | 0.172176 | -4.81243 | -1.12015 | P11798   | Calcium/c: Camk2a     | HPWISHRSTVASCMMH  |
| S | 1        | 279  | 0.040669 | 0.757978 | -1.91923 | 0.346038 | P11798   | Calcium/c: Camk2a     | SHRSTVASCMMHRQET  |
| T | 1        | 287  | 0.028059 | 0.630141 | -1.25378 | 0.270635 | Q5SVJ0   | Calcium/c: Camk2b     | SMMHRQETVECLKKF   |
| T | 0.988646 | 371  | 0.000166 | 0.853485 | -4.8069  | -0.18284 | Q923T9-2 | Calcium/c: Camk2g     | TDGIGKSTESCNTTT   |
| T | 0.988646 | 348  | 0.000167 | 0.853855 | -4.80835 | -0.18284 | Q923T9-3 | Calcium/c: Camk2g     | TDGIGKSTESCNTTT   |
| S | 1        | 734  | 0.03555  | 0.820546 | 0.803242 | 0.116448 | A2AHC3   | Calmodulii Camsap1    | WTILRQDSDSDVVDV   |
| S | 1        | 736  | 0.03555  | 0.820546 | 0.803242 | 0.116448 | A2AHC3   | Calmodulii Camsap1    | ILRQDSDSDVVDVED   |
| S | 1        | 1248 | 0.000412 | 0.359227 | -3.02893 | -0.39931 | Q8C1B1   | Calmodulii Camsap2    | IHRDHIESDPVPIKIG  |
| T | 1        | 830  | 0.002536 | 0.197338 | -1.72865 | 0.45786  | Q80VC9   | Calmodulii Camsap3    | SILLSEGTPPEEPTT   |
| S | 0.999982 | 1077 | 0.003459 | 0.004649 | 2.304635 | 1.927707 | Q80VC9   | Calmodulii Camsap3    | RPTSRAPSPSGLMSP   |
| S | 1        | 362  | 0.004001 | 0.379461 | 1.420862 | 0.29617  | Q80VC9   | Calmodulii Camsap3    | NFRHPLLSPGGPQSP   |
| S | 1        | 368  | 0.004001 | 0.379461 | 1.420862 | 0.29617  | Q80VC9   | Calmodulii Camsap3    | LSPGGPQSPLRGSTG   |
| S | 0.998761 | 431  | 0.383005 | 0.044859 | 0.355154 | 0.749208 | Q80VC9   | Calmodulii Camsap3    | PVLLRSVSSDSL GPP  |
| S | 0.999984 | 434  | 0.383005 | 0.044859 | 0.355154 | 0.749208 | Q80VC9   | Calmodulii Camsap3    | LRSVSSDSL GPPRPV  |

|   |          |      |          |          |          |          |          |              |          |                  |
|---|----------|------|----------|----------|----------|----------|----------|--------------|----------|------------------|
| S | 1        | 582  | 0.016959 | 0.955896 | -0.94748 | -0.05271 | P35564   | Calnexin     | Canx     | EDELNRSRNRKPR    |
| S | 0.999659 | 34   | 0.013328 | 0.173744 | -1.66912 | -0.68608 | P40124   | Adenylyl c   | Cap1     | MHCGYGDSPSKGAVP  |
| S | 1        | 53   | 0.007171 | 0.986285 | -2.04856 | 0.050902 | Q9CR86   | Calcium-re   | Carhsp1  | TRRTRTFSATVRASQ  |
| S | 1        | 791  | 0.025743 | 0.767007 | -1.0527  | -0.16359 | Q6P9K8   | Caskin-1     | Caskin1  | PTKAQPGSPQALGGP  |
| S | 1        | 1259 | 0.019424 | 0.558553 | -0.74498 | 0.1668   | Q6P9K8   | Caskin-1     | Caskin1  | VPLPGPGSPEVKRAH  |
| S | 0.999767 | 423  | 0.000708 | 0.916678 | -4.50563 | 0.170167 | Q6P9K8   | Caskin-1     | Caskin1  | ATVLSQKSVSESSPG  |
| S | 1        | 95   | 0.016715 | 0.392207 | 1.072758 | -0.30741 | Q9DCC5   | Chromobo     | Cbx3     | GTKRKSLSDESDDSD  |
| S | 1        | 50   | 0.000195 | 0.006757 | -3.3087  | -1.37065 | Q3TVA9   | Coiled-coil  | Ccdc136  | MGKHRGLSLTETELE  |
| T | 1        | 137  | 0.002782 | 0.773714 | -2.58347 | -0.23137 | Q9CR29   | Coiled-coil  | Ccdc43   | LAQYADVTDEEDEAD  |
| S | 0.999997 | 308  | 0.006278 | 0.494455 | -1.37987 | -0.26249 | Q5SP85   | Coiled-coil  | Ccdc85a  | PKHVLSGSPHFQKH   |
| S | 0.999994 | 194  | 0.0152   | 0.985687 | -1.39888 | 0.042591 | Q8VDN4   | Coiled-coil  | Ccdc92   | RRMKKSLAPLHPEF   |
| S | 1        | 305  | 0.021384 | 0.959    | -3.26667 | -0.18566 | Q7TQK5   | Coiled-coil  | Ccdc93   | SELSAEESPEKLGTS  |
| S | 1        | 393  | 0.031221 | 0.970422 | -1.53749 | 0.081661 | Q8K2Y9   | Cerebral c   | Ccm2     | GRGIITDSFGRHRA   |
| S | 1        | 358  | 0.014154 | 0.498064 | -0.70734 | 0.162511 | Q52KE7   | Cyclin-L1    | Ccn1     | EVKAEKSPVSNVVK   |
| S | 1        | 222  | 0.041448 | 0.608533 | -2.11793 | -0.53053 | Q8QZT2   | Centriole,   | Ccsap    | AQRQRAHSVDVEKNQ  |
| S | 1        | 1692 | 0.985107 | 0.035226 | -0.13715 | -2.83375 | Q7TT50   | Serine/thr   | Cdc42bpb | SNPSGPPSPNSPHRS  |
| S | 1        | 64   | 0.000859 | 0.012196 | -2.67972 | -1.31636 | Q9JM96   | Cdc42 effe   | Cdc42ep4 | AREADDESLEQASA   |
| S | 0.999939 | 110  | 0.019094 | 0.283831 | -1.32284 | -0.47435 | Q04735   | Cyclin-dep   | Cdk16    | NHPPRKISTEDINKR  |
| S | 0.999795 | 109  | 0.002819 | 0.735619 | -1.22628 | -0.1214  | Q04899   | Cyclin-dep   | Cdk18    | TRMSRRASLDIGFG   |
| T | 0.999713 | 138  | 0.026712 | 0.85698  | -1.42975 | 0.168318 | P61809   | Cyclin-dep   | Cdk5r1   | PAITSAGTPKRVIVQ  |
| S | 1        | 347  | 0.036313 | 0.015018 | -0.65215 | -0.73538 | Q99J95   | Cyclin-dep   | Cdk9     | APPRRKGSQLTQQST  |
| S | 0.985127 | 34   | 0.044404 | 0.669341 | 1.768147 | 0.40064  | Q99L43   | Phosphatic   | Cds2     | DGETASDSERAETA   |
| S | 0.998911 | 109  | 0.009905 | 0.246941 | 1.096633 | -0.35856 | Q9JKC6   | Cell cycle   | Cend1    | DGAEEDESNTGGRGP  |
| S | 0.999999 | 1341 | 0.011012 | 0.181533 | -1.42728 | -0.54981 | Q80U49   | Centrosom    | Cep170b  | GDGDSLSPGPTRSP   |
| S | 0.999532 | 981  | 0.068927 | 0.019522 | 0.600798 | -0.76537 | Q80U49   | Centrosom    | Cep170b  | PQKESPLSPTVPDP   |
| T | 1        | 25   | 0.02719  | 0.319387 | -0.86841 | -0.3202  | P18760   | Cofilin-1    | Cfl1     | MKVRKSSTPEEVKKR  |
| S | 1        | 110  | 0.028302 | 0.363808 | -1.33564 | -0.46065 | Q8K327   | Chromoso     | Champ1   | TESGKSPSPERQNP   |
| S | 0.999994 | 164  | 0.005238 | 0.031985 | -2.72022 | -1.55397 | Q91VN4   | MICOS cor    | Chchd6   | SLPKKKASLTHEQQQ  |
| S | 1        | 1997 | 0.021569 | 0.408854 | -1.14526 | 0.340537 | Q09XV5   | Chromodo     | Chd8     | QCTSRTASPSLRPD   |
| S | 1        | 1997 | 0.00786  | 0.038418 | 0.832503 | 0.496921 | Q09XV5   | Chromodo     | Chd8     | QCTSRTASPSLRPD   |
| S | 1        | 1999 | 0.00786  | 0.038418 | 0.832503 | 0.496921 | Q09XV5   | Chromodo     | Chd8     | TSRTASPSLRPDAP   |
| S | 0.771396 | 99   | 0.031878 | 0.533741 | -5.86873 | -1.56471 | P16014   | Secretogra   | Chgb     | ASGTRWASSREDAGA  |
| S | 0.968108 | 100  | 0.003788 | 0.520645 | -6.39516 | -1.03573 | P16014   | Secretogra   | Chgb     | SGTRWASSREDAGAP  |
| S | 0.999999 | 199  | 0.011482 | 0.999045 | -3.30962 | -0.02416 | Q8BJF9   | Charged m    | Chmp2b   | STSKATISDEEIERQ  |
| S | 0.999918 | 1080 | 0.016939 | 0.893632 | -1.12426 | -0.09976 | Q924A2   | Protein ca   | Cic      | PGKRRTQSLALPKE   |
| S | 1        | 148  | 0.05002  | 0.028122 | -2.52284 | -2.65092 | P30275   | Creatine ki  | Ckmt1    | HTDDL DASKIRSGYF |
| S | 1        | 600  | 0.009046 | 0.010693 | -3.19766 | -2.74735 | E9QKH0   | CLIP-assoc   | Clasp1   | GSLQRSRSDIDVNAA  |
| S | 1        | 376  | 0.005102 | 0.032672 | -2.73369 | -1.54326 | F7DCH5   | CLIP-assoc   | Clasp2   | GSLQRSRSDIDVNAA  |
| T | 0.860257 | 600  | 0.000222 | 0.117895 | -3.90077 | -0.75192 | F7DCH5   | CLIP-assoc   | Clasp2   | SAMRVLNTGSDVEEA  |
| S | 1        | 14   | 0.939704 | 0.005779 | 0.143142 | -2.26634 | F7DCH5   | CLIP-assoc   | Clasp2   | KRICDYKSFDDDEESV |
| S | 0.999969 | 319  | 0.993918 | 0.013908 | -0.02518 | -1.04136 | F7DCH5   | CLIP-assoc   | Clasp2   | TYLKSSGVSASLPQS  |
| S | 0.99999  | 247  | 0.950134 | 0.041247 | 0.143142 | -1.52386 | Q8BRT1-5 | CLIP-assoc   | Clasp2   | KSFDDEESVDGNRPS  |
| S | 0.992603 | 58   | 0.01017  | 0.80428  | -1.98986 | -0.22019 | Q99LI2   | Chloride c   | Clcc1    | KKEVSPDSSEAEELS  |
| S | 1        | 419  | 0.005601 | 0.969878 | -1.68839 | 0.059101 | Q8C5W0   | Calmin       | Clmn     | KDGRRSNSLPVKKTV  |
| S | 1        | 100  | 0.00148  | 0.508781 | -2.02645 | 0.272094 | Q923F1   |              | Clns1a   | EESKEPLSDEDEEDN  |
| S | 1        | 103  | 0.012203 | 0.950773 | -2.42926 | -0.13184 | B1AWE0   | Clathrin lig | Clta     | SEVDRLQSEPSIRK   |
| S | 0.999998 | 329  | 0.00011  | 0.096472 | -1.32998 | -0.23787 | Q9D4C9   | Clavesin-1   | Clvs1    | KPMKRSQSVEAGTL   |
| S | 1        | 317  | 0.003428 | 0.212659 | -4.10172 | -1.12427 | P47746   | Cannabino    | Cnr1     | IQRGTQKSIHHTSE   |
| S | 1        | 171  | 8.84E-05 | 0.834434 | -3.17567 | -0.11375 | Q5SU73   | Coilin       | Coil     | KKSKVTGSPAEEDDE  |
| S | 0.968484 | 261  | 0.000315 | 7.87E-05 | -5.32695 | -6.34931 | O88587   | Catechol C   | Comt     | VYQGPSPVKS       |
| S | 1        | 13   | 0.014695 | 0.013435 | -1.70404 | -1.55839 | O89079   | Coatomer     | Cope     | PGAVSGSGSEVDEL   |
| S | 1        | 141  | 0.542335 | 0.011984 | -0.18243 | -0.71463 | Q9CQI6   | Coactosin-   | Cotl1    | GANYDAQSE        |
| S | 1        | 54   | 0.005773 | 0.641638 | -1.31942 | -0.18844 | Q6P1J1   |              | Crmp1    | TIDFDAYSGRRGSA   |
| T | 1        | 623  | 0.00149  | 0.443199 | -2.24283 | 0.337167 | Q6P1J1   | Dihydropy    | Crmp1    | PVYEV PATPKHAAPA |
| S | 0.999997 | 557  | 0.042354 | 0.999373 | -0.86999 | 0.007238 | Q9R194   | Cryptochr    | Cry2     | ALSSGPASPKRKLEA  |
| S | 0.999786 | 2    | 0.032834 | 0.939815 | -2.11202 | 0.164351 | P67871   | Casein kin   | Csnk2b   | MSSSEEVSW        |
| S | 1        | 192  | 0.001155 | 0.264975 | -2.11977 | -0.41201 | P97315   | Cysteine ai  | Csrp1    | GAGALVHSE        |
| S | 1        | 641  | 0.005152 | 0.268919 | -3.03174 | -0.81497 | P26231   | Catenin al   | Ctnna1   | TPEELDDSDFETEDF  |
| S | 1        | 640  | 0.010423 | 0.849564 | -2.36521 | -0.22591 | Q61301   | Catenin al   | Ctnna2   | PEEELDDSDFEQEDY  |
| S | 1        | 637  | 0.024594 | 0.345303 | -3.55953 | -1.22112 | Q65CL1   | Catenin al   | Ctnna3   | PEELEDVSDLEDHDE  |

|   |          |      |          |          |          |          |          |                        |                   |
|---|----------|------|----------|----------|----------|----------|----------|------------------------|-------------------|
| S | 1        | 268  | 0.033214 | 0.998284 | -1.45891 | -0.01877 | P30999   | Catenin de Ctnnd1      | PQVRVGGSSVDLHRF   |
| S | 1        | 411  | 0.013033 | 0.311253 | -1.17513 | -0.36426 | E9QKH8   | Catenin de Ctnnd2      | PELRALQSPPEHHIDP  |
| S | 1        | 533  | 0.017159 | 0.999971 | -2.54667 | 0.003591 | E9QKH8   | Catenin de Ctnnd2      | ARSPSIDSIQKDPRE   |
| S | 0.999513 | 456  | 0.031332 | 0.104551 | 4.260664 | 2.643581 | E9QKH8   | Catenin de Ctnnd2      | FRTSTAPSSPGVDSV   |
| S | 0.998618 | 457  | 0.292119 | 0.02697  | 0.686568 | 1.421259 | E9QKH8   | Catenin de Ctnnd2      | RTSTAPSSPGVDSVP   |
| S | 1        | 407  | 0.000284 | 0.091012 | -5.43189 | 1.205798 | Q60598   | Src substrα Cttn       | QTPPASPSQPIEDR    |
| S | 0.999966 | 417  | 0.000628 | 0.853002 | 1.339968 | 0.067431 | Q60598   | Src substrα Cttn       | PIEDRPPSSPIYEDA   |
| S | 1        | 407  | 0.002592 | 0.014189 | 0.994132 | 0.598232 | Q60598   | Src substrα Cttn       | QTPPASPSQPIEDR    |
| S | 0.999966 | 417  | 0.007493 | 0.059207 | 1.224783 | 0.637398 | Q60598   | Src substrα Cttn       | PIEDRPPSSPIYEDA   |
| T | 1        | 401  | 0.002277 | 0.012847 | 1.056727 | 0.633275 | Q60598   | Src substrα Cttn       | QARAKKQTPPASPS    |
| S | 1        | 309  | 0.006506 | 0.169712 | -3.22944 | -1.12875 | Q9DBF7   | Pre-mRNA Cwc25         | RKERDPSPKKEAYQ    |
| S | 0.999509 | 332  | 0.011853 | 0.989949 | -1.04937 | 0.025136 | P97792   | Coxsackiev Cxadr       | DFERAPQSPTLAPAK   |
| S | 1        | 1163 | 0.004455 | 0.913838 | -3.49054 | -0.20085 | F6ZGR6   | D430041D               | RKRNVNTASDEEESGAG |
| S | 1        | 978  | 0.001291 | 0.049283 | -1.86442 | -0.69042 | Q3UHC7   | Disabled h Dab2ip      | SSSSKGDSPELKPRA   |
| S | 0.999999 | 409  | 0.013243 | 0.625828 | -1.49229 | 0.267937 | Q0PHV7   | Dapper ho Dact3        | RKAARSQSETSLGLR   |
| S | 0.999742 | 1032 | 0.021058 | 0.264903 | -1.72911 | -0.65883 | Q6WQJ1   | Sn1-specifici Dagla    | TPTGHGASPTKQDDL   |
| S | 1        | 142  | 0.002094 | 0.253989 | -2.10455 | 0.475561 | Q9QXS6   | Drebrin Dbn1           | NGLARLSSPVLHRLR   |
| S | 1        | 100  | 0.001031 | 0.104417 | -4.15544 | -1.15603 | Q8N7N5   | DDB1- and Dcaf8        | ESRGGHGSDEEDEEQ   |
| S | 0.99999  | 545  | 0.011088 | 0.073093 | 2.495436 | 1.336164 | Q91YD3   | mRNA-dec Dcp1a         | ERKASSPSPLTVGTA   |
| S | 1        | 33   | 0.001422 | 0.115929 | -1.07068 | -0.30772 | Q9CWS0   | N(G),N(G)- Ddah1       | CRHALRRSGGEEVD    |
| S | 1        | 247  | 0.026786 | 0.99584  | 4.139352 | 0.078293 | Q7TNV0   | Protein DE Dek         | EKKNKEESSEDEEKE   |
| S | 1        | 248  | 0.000811 | 0.344143 | 4.35922  | 0.680608 | Q7TNV0   | Protein DE Dek         | KKNKEESSEDEEKES   |
| S | 0.999946 | 656  | 0.002252 | 0.968813 | -2.51354 | 0.072931 | Q8K382   | DENN domr Dennd1a      | PSKSPITSPEKPSAL   |
| S | 0.997301 | 736  | 0.052659 | 0.006581 | -0.70944 | -1.08548 | Q3U1Y4   | DENN domr Dennd4b      | PSRSAPSSPAPRRTK   |
| S | 1        | 22   | 0.027474 | 0.806061 | -0.93282 | -0.13199 | O08808   | Protein dia Diaph1;Diz | RDKKKGRSPDELPAT   |
| S | 0.999916 | 1256 | 0.001323 | 0.126533 | -1.6934  | -0.46421 | Q8C9B9   | Death-indt Dido1       | TSTTPPGSPPPPPL    |
| S | 1        | 481  | 0.199672 | 0.044478 | 1.415211 | 2.124507 | Q9ESX5   | H/ACA ribc Dkc1        | KPKTVLESGGETGDG   |
| S | 1        | 40   | 0.04834  | 0.422714 | -5.41468 | -1.96178 | D3Z3B8   | Dlg1                   | KHWAKKGSDELQAE    |
| S | 1        | 28   | 0.035451 | 0.231494 | -1.21847 | -0.56972 | E9Q2L2   | Dlg2                   | EDGPHDHSPLRLTHE   |
| S | 0.999665 | 328  | 0.016704 | 0.259972 | 0.880356 | 0.319167 | E9Q2L2   | Dlg2                   | PISPGRYSPIPKHML   |
| S | 1        | 295  | 0.021932 | 0.719315 | -2.33013 | -0.3906  | Q62108   | Disks large Dlg4       | PTSPRRYSPVAKDLL   |
| S | 1        | 947  | 0.026543 | 0.542603 | -1.68899 | -0.42203 | Q9D415   | Disks large Dlgap1     | APLIRERSLESSRQ    |
| S | 1        | 509  | 0.046303 | 0.996709 | -1.44532 | -0.02829 | Q9D415   | Disks large Dlgap1     | RAIEKGCQDDECVS    |
| S | 1        | 154  | 0.002547 | 0.724338 | -3.85549 | -0.38332 | Q9D415   | Disks large Dlgap1     | KLFTKSHLEGPSKG    |
| S | 1        | 930  | 0.033295 | 0.943734 | -0.98289 | -0.07411 | Q6PFD5   | Disks large Dlgap3     | GVPVKERSLDSVDRQ   |
| S | 1        | 415  | 0.003313 | 0.997852 | 1.004413 | 0.008234 | B1AZP2-2 | Disks large Dlgap4     | EQSNPRRSLDRLDSV   |
| S | 1        | 421  | 0.003313 | 0.997852 | 1.004413 | 0.008234 | B1AZP2-2 | Disks large Dlgap4     | RSLDRRSLDMLLPS    |
| S | 1        | 87   | 0.043901 | 0.690528 | -1.417   | 0.305981 | Q9WV69   | Dematin Dmtn           | RSRECSLSPKSTSP    |
| S | 0.999978 | 289  | 0.016841 | 0.482665 | -1.23093 | 0.303241 | Q9WV69   | Dematin Dmtn           | SGTSKSSSLPSYGR    |
| S | 0.999982 | 110  | 0.031504 | 0.141294 | -2.22101 | -1.23726 | Q9WV69   | Dematin Dmtn           | SRTLGIISQASTPRT   |
| S | 0.999771 | 572  | 0.003019 | 0.699036 | -1.37987 | 0.150911 | Q6PNC0   | DmX-like p Dmx1        | TGLRTRSTMLISSAH   |
| S | 1        | 473  | 0.008938 | 0.526273 | -2.41182 | -0.47197 | Q8BPN8   | DmX-like p Dmx1        | EDGEREGSPRTHPRP   |
| S | 1        | 1288 | 0.002461 | 0.274206 | -1.81528 | -0.409   | Q8BPN8   | DmX-like p Dmx1        | FGNVADADSPVEETIQ  |
| S | 1        | 1856 | 0.003411 | 0.673186 | -0.96292 | 0.114403 | Q8BPN8   | DmX-like p Dmx1        | LIRRNLASPEGTLAT   |
| T | 1        | 2017 | 5.22E-05 | 0.006858 | -4.32352 | -1.36105 | Q8BPN8   | DmX-like p Dmx1        | SDPRALLTPQDEECA   |
| S | 1        | 1138 | 0.04293  | 0.128933 | 2.434139 | 1.529694 | Q8BPN8   | DmX-like p Dmx1        | KVGSVLDSRVSVDSN   |
| S | 1        | 1141 | 0.009406 | 0.002341 | -3.03325 | -3.73127 | Q8BPN8   | DmX-like p Dmx1        | SVLDSRVSVDSNLFV   |
| S | 1        | 1144 | 0.009406 | 0.002341 | -3.03325 | -3.73127 | Q8BPN8   | DmX-like p Dmx1        | DSRVSVDSNLFVYYSK  |
| S | 1        | 151  | 0.006482 | 0.044433 | -4.01077 | -2.19567 | P60904   | DnaJ homc Dnajc5       | EETEFYVSPEDLEAQ   |
| S | 0.999493 | 512  | 0.032336 | 0.00872  | -1.25505 | -1.5647  | P39053-4 | Dynammin-1 Dnm1        | QMNNKKTSGNQDEIL   |
| S | 0.989621 | 1629 | 0.032423 | 0.022068 | 2.338245 | 2.317103 | P59764   | Dedicator Dock4        | NSAPASMSPDGTRVI   |
| S | 1        | 440  | 0.002164 | 0.418134 | -2.99282 | -0.50928 | Q8R1A4   | Dedicator Dock7        | WSERRNSSLVGRRSL   |
| S | 1        | 527  | 0.010161 | 0.89558  | -0.99097 | 0.076748 | Q66L44   | Protein Do Dos         | ELPAPARRSPRSPRA   |
| S | 1        | 297  | 0.043333 | 0.359151 | -0.96589 | -0.37781 | Q66L44   | Protein Do Dos         | TLRRLRRHASLDGASPY |
| T | 1        | 509  | 0.003061 | 0.708648 | -2.08058 | 0.223404 | O08553   | Dihydropy Dpysl2       | PCVEVSVTPKTVTPA   |
| T | 1        | 512  | 0.000166 | 0.615135 | -7.35313 | -0.51361 | O08553   | Dihydropy Dpysl2       | EVSVTPKTVTPASSA   |
| S | 0.998998 | 631  | 0.018467 | 0.525089 | -2.1623  | 0.506932 | E9PWE8   | Dpysl3                 | KGGTPAGSTRGSPTR   |
| S | 0.999988 | 635  | 0.018467 | 0.525089 | -2.1623  | 0.506932 | E9PWE8   | Dpysl3                 | PAGSTRGSPTRPNPP   |
| T | 1        | 627  | 0.018467 | 0.525089 | -2.1623  | 0.506932 | E9PWE8   | Dpysl3                 | TTTTKGGTPAGSTRG   |
| S | 1        | 531  | 0.009178 | 0.025799 | 2.571559 | 1.775027 | Q9EQF6   | Dihydropy Dpysl5       | GMRDLHESSFSLSGS   |

|   |          |      |          |          |          |          |          |             |            |                     |
|---|----------|------|----------|----------|----------|----------|----------|-------------|------------|---------------------|
| S | 1        | 415  | 0.013263 | 0.872686 | -4.17058 | -0.38453 | S4R1P5   | Dystonin    | Dst        | PEDVDVSSPDEKSVI     |
| S | 0.999881 | 7473 | 0.004651 | 0.4175   | -0.858   | -0.17352 | S4R1P5   | Dystonin    | Dst        | SKMLRSESNSISITAT    |
| S | 1        | 168  | 0.000403 | 0.000145 | 3.187081 | 3.523479 | S4R1P5   | Dystonin    | Dst        | DFSQKSGSASPAPGD     |
| S | 1        | 170  | 0.000448 | 0.00014  | 2.425474 | 2.761872 | S4R1P5   | Dystonin    | Dst        | SQKSGSASPAPGDTL     |
| S | 1        | 3    | 0.001689 | 0.53557  | -0.87095 | 0.11489  | Q9ROP5   | Destrin     | Dstn       | ____MASGVQVADE      |
| S | 1        | 205  | 0.00227  | 0.919335 | -3.12164 | 0.149062 | Q9DD18   | D-tyrosyl-t | Dtd1       | GAEGDVSSEREP____    |
| S | 1        | 196  | 0.003577 | 0.587373 | -2.59267 | 0.368068 | Q9DD18   | D-tyrosyl-t | Dtd1       | RKEDRSASSGAEGDV     |
| S | 1        | 306  | 0.008269 | 0.912668 | -1.86257 | -0.12463 | Q9D2N4   | Dystrobrev  | Dtna       | LTNALSKSLSCASSR     |
| S | 0.965045 | 500  | 0.425029 | 0.025834 | -1.3229  | 3.48887  | Q8CFR5   | Dystrobrev  | Dtna       | LKTQGASSPRSSPSH     |
| S | 0.994322 | 531  | 0.617144 | 0.04111  | 0.84464  | -2.74829 | O70585-2 | Dystrobrev  | Dtnb       | QAAQATGSPHTSPTH     |
| S | 1        | 162  | 0.00656  | 0.728208 | -3.35495 | 0.409764 | O88485   | Cytoplasm   | Dync1i1    | TPLATHQSEDEEDE      |
| S | 0.9948   | 510  | 0.068424 | 0.037589 | 1.022132 | 1.090589 | Q8R1Q8   | Cytoplasm   | Dync1li1   | TRKPASVSPPTTPTSP    |
| S | 0.9966   | 516  | 0.001198 | 0.150327 | -4.33838 | 1.090589 | Q8R1Q8   | Cytoplasm   | Dync1li1   | VSPPTTPTSPTEGEAS    |
| Y | 1        | 312  | 0.029275 | 0.896464 | -1.73591 | 0.175031 | A1L341   | Dual specil | Dyrk1a;Dy  | LGQRIYQIYQSRFYR     |
| S | 1        | 768  | 0.011086 | 0.998122 | -4.93245 | -0.05008 | Q8C008   | Double zin  | Dzank1     | QGLEDQLSPPGNRIL     |
| S | 1        | 106  | 0.005773 | 0.719918 | -4.215   | -0.50953 | O70251   | Elongation  | Eef1b      | DDIDLFGSDDEEESE     |
| S | 1        | 157  | 0.015492 | 0.862893 | -1.35441 | -0.13529 | Q91VK2   | Elongation  | Eef1d      | KDIDLFGSDEEEEDK     |
| S | 0.987009 | 220  | 0.704273 | 0.009396 | -0.50816 | -2.89399 | Q8BG67   | Protein     | EF1Efr3a   | SRLGPPSPSPAADKE     |
| S | 1        | 540  | 0.004225 | 0.157011 | -1.03229 | -0.33702 | Q8CHW4   | Translatior | Eif2b5     | EEDSRAGSPQLDIR      |
| S | 0.999983 | 75   | 0.004692 | 0.23947  | -2.04028 | 0.568361 | Q8JZQ9   | Eukaryotic  | Eif3b      | SEETATSPAAASPTP     |
| S | 1        | 166  | 0.075851 | 0.030783 | -0.76442 | -0.8902  | Q8R1B4   | Eukaryotic  | Eif3c      | YKQNPQSADEDAEK      |
| S | 0.999953 | 42   | 0.043149 | 0.777507 | 0.816237 | 0.142095 | Q9Z1D1   | Eukaryotic  | Eif3g      | PLPTGDTSPEPELLP     |
| T | 0.998571 | 41   | 0.043149 | 0.777507 | 0.816237 | 0.142095 | Q9Z1D1   | Eukaryotic  | Eif3g      | IPLPTGDTSPEPELL     |
| S | 0.998648 | 504  | 0.800494 | 0.015841 | -0.26627 | -2.38642 | Q8BGD9   | Eukaryotic  | Eif4b      | SSDTEQPSPTSGGGK     |
| S | 0.999964 | 422  | 0.783007 | 0.016528 | 0.277283 | -0.82724 | Q8BGD9   | Eukaryotic  | Eif4b      | RERSRTGSESSQTGA     |
| S | 0.999956 | 425  | 0.783007 | 0.016528 | 0.277283 | -0.82724 | Q8BGD9   | Eukaryotic  | Eif4b      | SRTGSESSQTGASAT     |
| S | 1        | 1211 | 0.047313 | 0.994938 | -1.4687  | 0.035895 | Q6NZJ6   | Eukaryotic  | Eif4g1     | EGLRKAASLTEDRGR     |
| S | 0.999955 | 108  | 0.000831 | 0.008595 | -1.7312  | -0.91876 | Q05D44   | Eukaryotic  | Eif5b      | GQKGGKTSFDENDSE     |
| S | 1        | 114  | 0.000831 | 0.008595 | -1.7312  | -0.91876 | Q05D44   | Eukaryotic  | Eif5b      | TSFDENDSELEDKD      |
| S | 0.999997 | 191  | 0.00265  | 0.978289 | 3.583093 | -0.08958 | Q8OY81   | Zinc phosp  | Elac2      | GKQQPSQSPRTSPNR     |
| S | 0.9739   | 154  | 0.002036 | 0.858731 | 3.633919 | 0.230367 | E9QK48   |             | Eml2       | GYATSPSSPKKEASS     |
| S | 1        | 263  | 0.013718 | 0.413925 | -1.21189 | -0.31862 | P17182   | Alpha-eno   | Eno1       | KYDLDFKSPDDPSRY     |
| S | 1        | 508  | 0.005712 | 0.259257 | -1.20396 | -0.33758 | A2A842   | Protein 4.1 | Epb4.1;Epl | ASKRASRSLDGA AAA    |
| S | 1        | 737  | 0.047855 | 0.665611 | -1.06197 | 0.247793 | E9PV14   |             | Epb4.1i1   | QTEARADSSDETDT      |
| S | 1        | 69   | 0.009266 | 0.875677 | -2.04281 | 0.170371 | A2AUK5   | Band 4.1-li | Epb4.1i1;E | DMDDKDYSEADGLSE     |
| S | 1        | 677  | 0.04885  | 0.99766  | -1.1971  | -0.02006 | A2AUK5   | Band 4.1-li | Epb4.1i1;E | ESGGLEDSPDRGACS     |
| S | 1        | 544  | 0.024938 | 0.006699 | -1.21945 | -1.5089  | A2AUK5   | Band 4.1-li | Epb4.1i1;E | RLPSSPASPSKGTGTP    |
| S | 1        | 378  | 0.005759 | 0.516554 | -1.93899 | 0.348048 | A2AUK5   | Band 4.1-li | Epb4.1i1;E | HTFFRLVSPPEPPK      |
| T | 0.999967 | 475  | 0.012552 | 0.721302 | -1.9808  | -0.28713 | A2AUK5   | Band 4.1-li | Epb4.1i1;E | AEEGEVVRTPTKIKEL    |
| T | 1        | 685  | 0.007366 | 0.980056 | -5.54803 | 0.167723 | A2AUK5   | Band 4.1-li | Epb4.1i1;E | PDRGACSTPEMPQFE     |
| S | 1        | 540  | 0.049272 | 0.006388 | 3.204136 | 4.841084 | A2AUK5   | Band 4.1-li | Epb4.1i1;E | DRERRLPSSPASPS      |
| S | 1        | 544  | 0.000108 | 0.60931  | 2.824917 | 0.182555 | A2AUK5   | Band 4.1-li | Epb4.1i1;E | RLPSSPASPSKGTGTP    |
| S | 1        | 639  | 0.047921 | 0.539775 | -4.02765 | -1.19168 | Q9Z2H5   | Band 4.1-li | Epb4111    | AFEDFSRSLPELDRD     |
| S | 1        | 639  | 0.001817 | 0.000679 | -4.33254 | -4.78976 | Q9Z2H5   | Band 4.1-li | Epb4111    | AFEDFSRSLPELDRD     |
| S | 1        | 116  | 0.019343 | 0.986982 | -2.54506 | -0.0785  | O70318   | Band 4.1-li | Epb4112    | QILGKEESLPEEESR     |
| S | 0.999977 | 470  | 0.031507 | 0.818894 | -3.25456 | -0.4589  | Q9WV92   | Band 4.1-li | Epb4113    | IYMKDSVSAAEVGTG     |
| S | 1        | 451  | 0.015358 | 0.470214 | -3.34941 | -0.8235  | Q9WV92-ε | Band 4.1-li | Epb4113    | KRYTMSRSLDGEVGT     |
| T | 1        | 518  | 0.003037 | 0.604935 | -2.81421 | 0.372741 | Q9WV92   | Band 4.1-li | Epb4113    | RKKAEEATPV T ALRH   |
| T | 0.999998 | 923  | 0.009098 | 0.702962 | -1.74796 | 0.244365 | Q9WV92   | Band 4.1-li | Epb4113    | VHKETEITPEDGED_     |
| T | 1        | 495  | 0.000672 | 0.998566 | -2.64793 | 0.012532 | Q9WV92   | Band 4.1-li | Epb4113    | TNLIITTVTPEKKAEE    |
| S | 0.999638 | 99   | 0.024316 | 0.865178 | -2.10596 | -0.23392 | Q9WV92   | Band 4.1-li | Epb4113    | DDKLSQRSSSKLSR      |
| S | 0.999881 | 453  | 0.010005 | 0.41014  | -1.78667 | -0.43772 | Q80VP1   | Epsin-1     | Epn1       | SLAESVGSPPPAATP     |
| S | 0.993316 | 416  | 0.861458 | 0.000328 | 0.13138  | -2.47649 | Q80VP1   | Epsin-1     | Epn1       | LRTALPTS GSGSTGEL   |
| T | 0.920544 | 415  | 0.001414 | 0.870354 | 4.039721 | -0.22536 | Q80VP1   | Epsin-1     | Epn1       | LR L TALPTS GSGSTGE |
| S | 0.999691 | 173  | 0.006461 | 0.328386 | -1.10044 | -0.27975 | Q8CHU3   | Epsin-2     | Epn2       | ITFGRGSSQP NLSTS    |
| S | 1        | 255  | 0.000685 | 0.99987  | -2.27499 | -0.00325 | Q60902   | Epidermal   | Eps1511    | LNSTGSLSPKHSVKQ     |
| S | 1        | 211  | 0.006543 | 0.34663  | -3.04673 | -0.75239 | Q5EBJ4   | Ermin       | Ermn       | KRKHREGSPLKEESL     |
| T | 1        | 234  | 0.031997 | 0.782371 | -2.20754 | -0.34881 | Q5EBJ4   | Ermin       | Ermn       | SPGSQPGTPEQPVF      |
| S | 0.925195 | 343  | 0.155919 | 0.009202 | 1.155959 | -2.35647 | Q925F2   | Endothelia  | Esam       | TPTPSVSSQALSSPR     |
| S | 0.99972  | 663  | 0.016973 | 0.733527 | 2.608227 | 0.39596  | Q3TZZ7   | Extended ε  | Esyt2      | DLGRSSSLLASPSH      |

|   |          |      |          |          |          |          |          |                       |                  |
|---|----------|------|----------|----------|----------|----------|----------|-----------------------|------------------|
| S | 1        | 650  | 0.556838 | 0.048346 | 0.907445 | 2.522321 | Q3TZZ7   | Extended s Esyt2      | KQPPEASPLGHRDL   |
| T | 1        | 313  | 0.000316 | 0.750132 | -2.95568 | 0.176424 | Q6PGF7   | Exocyst co Exoc8      | EDDEELATPEAEEEK  |
| S | 0.991245 | 119  | 0.004506 | 0.999647 | -1.76804 | -0.0063  | Q8VE88   | Protein FA Fam114a2   | ETSLGIPSPTEISAE  |
| S | 1        | 140  | 0.000171 | 0.000954 | 1.363056 | 0.849375 | Q9DB52   | Protein FA Fam122a    | RIDFIPVSPAPSPTTR |
| S | 0.999456 | 144  | 0.000171 | 0.000954 | 1.363056 | 0.849375 | Q9DB52   | Protein FA Fam122a    | IPVSPAPSPTRGIGK  |
| T | 0.999909 | 306  | 0.00098  | 0.282605 | -2.60679 | 0.473235 | Q8C729-2 | Protein FA Fam126b    | KVLKVEVPTVPRIS   |
| S | 1        | 320  | 0.005266 | 0.052056 | -3.32227 | -1.65518 | Q9CQV4   | Protein FA Fam134c    | SEDLDGHSDPPEESFA |
| T | 0.999954 | 448  | 0.019604 | 0.68748  | -1.72365 | -0.30132 | A2ATK9   | Fam171a1              | QTSFDNLTPSGTLGK  |
| S | 1        | 533  | 0.021925 | 0.232157 | -1.83524 | -0.75343 | Q6PGL7   | WASH corr Fam21       | KTQKGLFSDEEDSED  |
| S | 1        | 723  | 0.030519 | 0.630158 | -2.46573 | 0.544414 | Q6PGL7   | WASH corr Fam21       | PKVPLLFSEEDSEV   |
| S | 1        | 157  | 0.024091 | 0.013177 | -3.79475 | -3.95649 | Q6PGL7   | WASH corr Fam21       | LDIKAGNSDSEEDDA  |
| S | 1        | 613  | 0.036388 | 0.034    | -1.1459  | -1.04434 | Q6PGL7   | WASH corr Fam21       | KTSALLFSSDEEDQW  |
| S | 1        | 614  | 0.036388 | 0.034    | -1.1459  | -1.04434 | Q6PGL7   | WASH corr Fam21       | TSALLFSSDEEDQWN  |
| S | 0.999995 | 168  | 0.139091 | 0.027366 | -0.48261 | 0.71561  | Q8BGR5   | Protein FA Fam53b     | SPMQRSSSFLPARA   |
| S | 1        | 103  | 0.003857 | 0.973739 | -3.57385 | 0.107084 | Q76LS9   | Protein FA Fam63a     | RPQELPQSPRIQQPE  |
| S | 0.996027 | 129  | 0.043844 | 0.962542 | -2.02071 | -0.13322 | E9PYD1   | Fam98c                | LRLQRDSSPVPSFGE  |
| S | 1        | 476  | 0.012547 | 0.92188  | -1.80914 | -0.12609 | Q6NS60   | F-box only Fbxo41     | QRRPRRHSTEGEEGD  |
| S | 1        | 280  | 5.79E-06 | 5.56E-06 | -1.82952 | -1.65005 | Q9D824   | Pre-mRNA Fip111       | DRYGRAESDLRRLP   |
| S | 1        | 1091 | 0.012982 | 0.931605 | -1.77474 | -0.11622 | Q6P9Q6   | FK506-bin1 Fkbp15     | QGNRRRLSLTPDPEK  |
| S | 0.999999 | 9    | 0.014827 | 0.646704 | -0.94281 | 0.167102 | P26883   | Peptidyl-pi Fkbp1a    | GQVQVETSPDGRTF   |
| S | 1        | 493  | 0.016973 | 0.542477 | -0.91449 | 0.203568 | Q9JL04   | Formin-2 Fmn2         | ADDSGGGSPVLAAKA  |
| S | 1        | 171  | 0.036654 | 0.911101 | -1.05776 | -0.10442 | A2APV2   | Formin-like Fmnl2     | KSKPWSRSIEDLHRG  |
| S | 0.998572 | 432  | 0.019396 | 0.734366 | -1.67776 | 0.262969 | Q8K2I1   | Protein far Fntb      | ECEDEVTSDPATD__  |
| S | 1        | 415  | 0.003856 | 0.143498 | 1.088172 | 0.360381 | Q3UCQ1   | Forkhead t Foxk2      | QEARFAQSAPGSPLS  |
| S | 0.999989 | 419  | 0.003856 | 0.143498 | 1.088172 | 0.360381 | Q3UCQ1   | Forkhead t Foxk2      | FAQSAPGSPSSQPV   |
| S | 0.999974 | 270  | 0.010577 | 0.603822 | 2.017558 | -0.35756 | F6XM46   | FERM dom Frmd5        | AGMVPSRSCPSITHG  |
| S | 0.998795 | 21   | 0.03927  | 0.752579 | -1.88921 | -0.34196 | Q3UFK8   | FERM dom Frmd8        | AERSHRSSVSSVGAR  |
| S | 0.999999 | 2815 | 0.018063 | 0.999716 | -1.33509 | 0.005944 | E9Q8I9   | Protein fur Fry       | KATFAGGSRDGVITC  |
| S | 0.949183 | 1939 | 0.982495 | 0.01806  | -0.06205 | -1.4098  | E9Q8I9   | Protein fur Fry       | FTVLSRSSPDLSSS   |
| S | 0.999999 | 1940 | 0.984188 | 0.020607 | -0.06205 | -1.4351  | E9Q8I9   | Protein fur Fry       | TVLSRSSPDLSSS    |
| S | 0.885877 | 3013 | 0.994809 | 0.032162 | 0.049393 | 1.779509 | E9Q8I9   | Protein fur Fry       | LTAFLPDSSVSGTSL  |
| S | 1        | 313  | 0.020401 | 0.138468 | 3.930194 | 1.966617 | Q7TPM6   | Fibronectin Fsd1      | EGKGRASPVNNSPAR  |
| S | 1        | 317  | 0.461392 | 0.001172 | 0.174202 | 1.006967 | Q7TPM6   | Fibronectin Fsd1      | RTASPVNSPARGTPS  |
| S | 1        | 335  | 0.107853 | 0.003779 | -0.70833 | -1.54852 | Q9DBE9   | pre-rRNA r Ftsj3      | KALDISLSEEEEEEG  |
| S | 1        | 336  | 0.107853 | 0.003779 | -0.70833 | -1.54852 | Q9DBE9   | pre-rRNA r Ftsj3      | ALDISLSEEEEEEGD  |
| S | 1        | 602  | 0.000739 | 0.203077 | 1.027791 | 0.205778 | Q9WVR4   | Fragile X r Fxr2      | RGNRTDGSISGDGRQP |
| S | 1        | 604  | 0.000739 | 0.203077 | 1.027791 | 0.205778 | Q9WVR4   | Fragile X r Fxr2      | NRTDGSISGDGRQVPT |
| S | 1        | 68   | 0.036059 | 0.152157 | 1.611877 | 0.905634 | P59648   | FXYD dom: Fxyd7       | PTCKSCKSELSSAP   |
| T | 1        | 929  | 0.001252 | 0.993101 | -1.42269 | -0.01691 | Q9WV18   | Gamma-ar Gabbr1       | RSRRHPPTPPDPSSGG |
| S | 1        | 193  | 0.021005 | 0.207675 | -5.59164 | -2.38872 | P06837   | Neuromod Gap43        | PTETAESSQAEEEEKD |
| S | 0.828055 | 208  | 0.025022 | 0.319454 | -0.75643 | 0.272794 | P16858   | Glyceralde Gapdh;Gm   | AQNIIPASTGAAKAV  |
| S | 0.969622 | 758  | 0.175354 | 0.008459 | -0.7028  | -1.53269 | Q6PAR5   | GTPase-actin Gapvd1   | TDVREVSSRPSTPGL  |
| S | 0.999999 | 103  | 0.040821 | 0.752807 | 1.447426 | 0.264724 | Q8CHY6   | Transcripti Gatad2a   | SPDVIVLSDSEQPSS  |
| S | 0.998212 | 259  | 0.008558 | 0.686596 | -0.98278 | 0.140333 | P47856   | Glutamine Gfpt1       | CGLSRVDDSTCLFPV  |
| S | 0.999519 | 413  | 0.309001 | 0.039431 | -1.05563 | 2.030689 | Q99MR1   | PERQ amir Gigyf1      | SLSPRISSPPGPPGD  |
| S | 1        | 368  | 0.946841 | 0.047966 | -0.25143 | -2.47897 | P23242   | Gap junctin Gja1      | QRPSSRASSRASSRP  |
| S | 1        | 261  | 0.003436 | 0.990829 | -2.84113 | -0.04867 | Q921C1   | Gap junctin Gjc3      | KDTTDELSVVEAKEP  |
| S | 0.992348 | 121  | 0.000871 | 0.710733 | -3.35815 | -0.27283 | Q64516   | Glycerol ki Gk;Gyk;Gy | WLDLRTQSTVENLSK  |
| S | 1        | 139  | 0.029471 | 0.237342 | -1.23266 | -0.54157 | Q8K3I9   | Glucocortic Glcci1    | PERRSPGSPVCRVDR  |
| T | 0.999999 | 2503 | 0.015288 | 0.77907  | -1.53531 | 0.201974 | E9Q2E4   | Gm15800               | GWERTEGTPPPPGQP  |
| S | 0.976319 | 8    | 0.021138 | 0.175855 | -2.53646 | -1.16549 | J3QPK1   | Gm21833               | KKQEDNPSTKLKEDS  |
| S | 0.999963 | 99   | 0.499116 | 0.003142 | 0.331178 | -1.64409 | Q3UPT2   | Gm26596               | RENRLGASPSRSGLF  |
| S | 1        | 319  | 0.007661 | 0.580407 | -1.29438 | 0.221784 | A2AJA9   | Uncharacter Gm996     | SEEPFRPSPRRGGSY  |
| S | 1        | 207  | 0.023609 | 0.090732 | -1.07573 | -0.64945 | P18872   | Guanine n Gnao1       | FDVGGQSRKKKWIH   |
| S | 1        | 21   | 0.035768 | 0.964006 | -2.30692 | -0.14069 | P62881-2 | Guanine n Gnb5        | SLKSEAESLKGKLEE  |
| S | 0.999763 | 8    | 0.006781 | 0.439817 | -1.23684 | -0.26281 | Q9CXP8   | Guanine n Gng10       | MSSGASVSALQRLVE  |
| S | 0.999949 | 324  | 0.000872 | 0.009473 | -1.83268 | -0.96023 | P36916   | Guanine n Gnl1        | GASWGNVSGEEEEEE  |
| S | 1        | 188  | 0.007755 | 0.817101 | 1.370592 | 0.136588 | Q8BUV3   | Gephyrin;I Gphn       | DELEDLSPPPPPLSP  |
| S | 1        | 194  | 0.007755 | 0.817101 | 1.370592 | 0.136588 | Q8BUV3   | Gephyrin;I Gphn       | PSPPPPPLSPPTTSP  |
| S | 1        | 318  | 0.044397 | 0.116938 | -0.83686 | -0.55019 | P35803   | Neuronal r Gpm6b      | QELQDIQSRKEQLN   |

|   |          |      |          |          |          |          |          |                       |                  |
|---|----------|------|----------|----------|----------|----------|----------|-----------------------|------------------|
| S | 0.998107 | 869  | 0.008257 | 0.195797 | -0.92071 | 0.32052  | Q8C419   | Probable C Gpr158     | KEDSEAEATESVPLV  |
| S | 1        | 904  | 0.0332   | 0.485604 | -1.54192 | -0.45168 | Q8C419   | Probable C Gpr158     | SMLQKLSLVIASAKE  |
| S | 1        | 539  | 0.044324 | 0.707031 | -0.86648 | -0.18092 | Q3UN16   | Probable C Gpr162     | GFSPRRRLSLGSPDSR |
| S | 1        | 626  | 0.024938 | 0.474957 | -2.69626 | 0.744695 | Q5U4C1   | G-protein i Gprasp1   | SVEAEVNSKSSLEDE  |
| S | 0.996129 | 679  | 0.003593 | 0.659167 | -1.66785 | 0.206374 | Q3UNH4   | G protein-i Gprin1    | REPSASTSQKDLAAA  |
| S | 1        | 694  | 0.043295 | 0.078435 | -2.28879 | -1.71041 | Q80TI0-4 | GRAM don Gramd1b      | LAEIHRQSPKEKASK  |
| S | 1        | 885  | 0.021635 | 0.215422 | -0.85477 | -0.36197 | H7BX90   | Glutamate Grip1       | SQLGRQASQFQERSSS |
| S | 1        | 900  | 0.005921 | 0.185756 | -0.81046 | 0.26693  | Q68ED2   | Metabotrc Grm7        | CENVDPNPSAAKKKY  |
| S | 1        | 163  | 0.038566 | 0.834318 | -1.07196 | -0.15175 | D3Z7I0   | General tr: Gtf3c2;Gm | KGLDQPESPHPKRPP  |
| S | 1        | 206  | 0.020391 | 0.800842 | -1.58685 | 0.21095  | Q9JKS5   | Intracellul: Habb4    | PGNRAFDSFDQQRGKR |
| S | 1        | 114  | 0.010244 | 0.704347 | -1.58298 | 0.22699  | Q8K2C9   | Very-long- Hacd3      | FDRWLDESDAEMELR  |
| S | 1        | 588  | 0.015339 | 0.661017 | -1.98436 | 0.344591 | O88704   | Potassium, Hcn1       | DRIGKKNKILLQKFQ  |
| S | 0.995639 | 818  | 0.017525 | 0.992467 | -4.888   | 0.111587 | O88703   | Potassium, Hcn2       | SARPASSSTPRLGPA  |
| S | 1        | 119  | 1.67E-05 | 0.728003 | -5.41063 | 0.18653  | O88703   | Potassium, Hcn2       | SAAEEAGSEEGAGPAG |
| S | 1        | 131  | 0.000401 | 0.214029 | -0.85748 | 0.147351 | O88703   | Potassium, Hcn2       | PAGEPRGSQASFLQR  |
| S | 1        | 834  | 0.743567 | 0.016211 | 0.394464 | 2.154887 | O88703   | Potassium, Hcn2       | TARTAAPSPDRRDSA  |
| S | 0.999863 | 807  | 0.019447 | 0.111706 | -1.17142 | 0.626238 | O88703   | Potassium, Hcn2       | PHGVVAPSPAASARP  |
| S | 0.999458 | 465  | 0.328882 | 0.003065 | -0.82269 | -3.07179 | Q6NZM9   | Histone de Hdac4      | RPLGRTQSAPLPQNA  |
| S | 1        | 165  | 0.001421 | 0.994949 | -2.28214 | -0.02384 | P51859   | Hepatoma Hdgf         | AGDVLDESPPKRPKE  |
| S | 0.999915 | 659  | 0.726484 | 0.019914 | -0.27819 | -1.38412 | Q3UMU9   | Hepatoma Hdgfrp2      | HERTRLASEANDDN   |
| S | 1        | 31   | 0.046123 | 0.963526 | -1.23686 | 0.081611 | Q8VDJ3   | Vigilin Hdlbp         | IKVATLNSEENDPP   |
| S | 0.999951 | 388  | 0.015938 | 0.642557 | -2.54354 | 0.462822 | Q6NVF4   | DNA helica Helb       | AKPNDPGSAEAVEGS  |
| S | 1        | 301  | 0.016873 | 0.881397 | -2.04695 | 0.192668 | Q640R3   | Hepatocyt: Hepacam    | EADTLPRSGEQERKN  |
| T | 1        | 297  | 0.008446 | 0.752251 | -3.23531 | 0.395428 | Q640R3   | Hepatocyt: Hepacam    | RLKSEADTLPRSGEQ  |
| S | 0.996022 | 323  | 0.036115 | 0.211321 | -2.28925 | -1.1218  | Q8VD75   | Huntingtin Hip1       | AEVSSPDSEPVLEKD  |
| S | 1        | 2    | 0.010012 | 0.257422 | -0.92565 | 0.297315 | P43277   | Histone H1Hist1h1d    | _____MSETAPAAP   |
| S | 1        | 302  | 0.024717 | 0.230746 | -3.06472 | -1.30198 | Q8R1M0   | Embryonic Hmces       | PKKEVPDSPKKDASG  |
| S | 1        | 6    | 0.014915 | 0.864434 | -0.99288 | 0.097621 | Q9DCB1   | High mobil Hmgn3      | ___MPKRKSPENTEGK |
| S | 1        | 4    | 0.030284 | 0.960509 | -2.357   | -0.14406 | Q5EBP8   | Heterogen Hnrnpa1     | ___MSKSESPKEPE   |
| S | 0.999993 | 359  | 0.028076 | 0.948886 | -1.18865 | 0.081387 | Q8BG05   | Heterogen Hnrnpa3;C   | FGGRSSGSPYGGGYG  |
| S | 1        | 116  | 0.067656 | 0.040853 | -1.5615  | -1.62181 | Q8BG05   | Heterogen Hnrnpa3;C   | RAVSREDSVKPGAHL  |
| S | 1        | 226  | 0.040354 | 0.97909  | -2.91637 | -0.13933 | Q00PI9   | Heterogen Hnrnpul2    | AYHSRSKSPPPPEEE  |
| S | 1        | 226  | 0.041009 | 0.971399 | -0.80843 | -0.04552 | P11499   | Heat shock Hsp90ab1   | KEREKESDDEAESEE  |
| S | 0.999999 | 24   | 0.048878 | 0.995577 | -4.23724 | 0.097705 | Q8K0U4   | Heat shock Hspa12a    | APTSTYSSPARSLGD  |
| S | 0.999993 | 631  | 0.005127 | 0.865737 | -0.77172 | -0.05849 | Q8K0U4   | Heat shock Hspa12a    | LRLDLTGSGGTAVPA  |
| S | 1        | 276  | 0.034727 | 0.961521 | -1.09697 | 0.068678 | Q9CZJ2   | Heat shock Hspa12b    | GRLGERRSIDSSFRH  |
| T | 1        | 545  | 0.00672  | 0.115136 | -2.86358 | -1.16877 | P48722   | Heat shock Hspa4l     | QKCHAEHTPEEIEDH  |
| S | 1        | 810  | 0.038973 | 0.560377 | -2.24755 | 0.604368 | Q61699   | Heat shock Hsph1      | QPKPKIESPKEERTP  |
| S | 1        | 441  | 0.988775 | 0.019675 | 0.058402 | -1.62529 | Q8BGC0   | HIV Tat-sp: Htatsf1   | KAEEGGESEGDASEK  |
| S | 1        | 242  | 0.017406 | 0.231141 | -2.35545 | -0.91331 | Q8BGC0   | HIV Tat-sp: Htatsf1   | KDYKKKLSLQKQLD   |
| S | 1        | 679  | 0.038978 | 0.474084 | -2.40665 | -0.75169 | Q8BGC0   | HIV Tat-sp: Htatsf1   | DEKLFDDSDKEDEE   |
| S | 1        | 705  | 8.43E-05 | 0.456811 | -4.68145 | -0.37628 | Q8BGC0   | HIV Tat-sp: Htatsf1   | DKVFEDNSNEKLFDE  |
| S | 1        | 1395 | 0.005545 | 0.188515 | -1.1512  | 0.371101 | Q7TMY8   | E3 ubiquiti Huwe1     | PMDQRAESPPEVACR  |
| S | 0.994727 | 3818 | 0.1084   | 0.030277 | -1.68981 | -2.22701 | Q7TMY8   | E3 ubiquiti Huwe1     | PMDVDQPSPAQDQTQ  |
| S | 0.999999 | 1215 | 0.016049 | 0.83942  | -1.8948  | 0.208925 | E9PZ19   | Igsf9b                | PLSSRTGSPELAARA  |
| S | 0.999895 | 437  | 0.032704 | 0.987009 | -1.37834 | 0.048798 | P46660   | Alpha-inte Ina        | RILSSTASKVSSAGL  |
| S | 1        | 941  | 0.035206 | 0.673923 | -1.66915 | 0.350902 | Q8CDA1   | Phosphatic Inpp5f     | LESPLKKSADSIIH   |
| S | 1        | 943  | 0.035292 | 0.781726 | -1.60182 | -0.26048 | Q8CDA1   | Phosphatic Inpp5f     | SPLKKSADSIIHTR   |
| S | 0.996133 | 266  | 0.00349  | 0.994586 | -1.79011 | -0.02361 | P59644   | Phosphatic Inpp5j     | RAAGPATSPPRQAQAF |
| S | 1        | 872  | 0.146145 | 0.048482 | 0.852019 | 1.097911 | P59644   | Phosphatic Inpp5j     | LLAPKSRSPGKSK    |
| S | 1        | 874  | 0.146145 | 0.048482 | 0.852019 | 1.097911 | P59644   | Phosphatic Inpp5j     | APKSRSPGKSKRHH   |
| S | 0.999916 | 183  | 0.059007 | 0.037088 | 3.134732 | 3.207984 | E9PUA3   | IQ motif ar Iqsec1    | YFEGKQVSVTNDGSQ  |
| S | 1        | 412  | 0.023132 | 0.271351 | -2.08947 | -0.80591 | A4GZ26   | IQ motif ar Iqsec2    | YFEGKQVSVTNDGSQ  |
| S | 0.985662 | 228  | 0.049011 | 0.280088 | -4.03924 | -1.88482 | A4GZ26   | IQ motif ar Iqsec2    | HSTSTSPATTLQAMA  |
| S | 1        | 256  | 0.002472 | 0.249538 | -1.30495 | -0.30855 | Q3TES0   | IQ motif ar Iqsec3    | ERPGAVGSPRAGPLR  |
| S | 0.932357 | 1072 | 0.015488 | 0.128174 | 3.772496 | 1.811686 | Q3TES0   | IQ motif ar Iqsec3    | PAPSPTSPPLPPD    |
| S | 1        | 195  | 0.023801 | 0.136157 | -0.90759 | 0.475724 | Q8K3X4   | Interferon Irf2bpl    | PELNRQSPNSSSAA   |
| S | 0.999963 | 303  | 0.018334 | 0.972263 | -3.0993  | 0.138494 | P81122   | Insulin rec: Irs2     | EFRPRSKQSSGSSA   |
| S | 1        | 30   | 0.003714 | 0.973205 | -1.82772 | -0.05486 | Q9D7P6   | Iron-sulfur Iscu      | RLPARELSAPARLYH  |
| S | 1        | 1573 | 0.003546 | 0.69841  | -2.15856 | -0.24508 | P11881-4 | Inositol 1,4 ltpr1    | RNAARRDSVLAASRD  |



|   |          |      |          |          |          |          |          |                      |                  |
|---|----------|------|----------|----------|----------|----------|----------|----------------------|------------------|
| S | 1        | 335  | 0.009589 | 0.891041 | -0.93707 | 0.073257 | Q9Z0R4   | Intersectin Itsn1    | RLPEEPSEDEQQPE   |
| S | 1        | 623  | 0.001355 | 0.023737 | -2.42662 | -1.11115 | Q9Z0R4   | Intersectin Itsn1    | QQLQKQKRSLEAARLK |
| S | 1        | 75   | 0.011394 | 0.008494 | 2.306774 | -2.21419 | Q9QXM1   | Junction-r Jmy       | DGSRGPGSPAARGRS  |
| S | 0.997127 | 172  | 0.007266 | 0.638095 | -1.1184  | -0.16971 | Q8K0T4   | Katanin p6 Katnal1   | KNVQDGDASDEIPKF  |
| S | 1        | 441  | 0.004331 | 0.99953  | -1.35653 | 0.005524 | P63141   | Potassium Kcna2      | SCPPIPSSPDLKKS   |
| S | 1        | 14   | 0.015021 | 0.273908 | 0.869978 | 0.299102 | P62482   | Voltage-ga Kcnab2    | TGSPARLSLRQTGSP  |
| S | 1        | 552  | 0.024667 | 0.005152 | -2.31893 | -3.04057 | Q9Z0V2   | Potassium Kcnd2      | VSGSHRGSVQELSTI  |
| S | 1        | 552  | 0.016109 | 0.000482 | -1.25568 | -2.47681 | Q9Z0V2   | Potassium Kcnd2      | VSGSHRGSVQELSTI  |
| S | 1        | 546  | 0.261604 | 0.001524 | -0.60052 | -2.3128  | Q9Z0V2   | Potassium Kcnd2      | RIPNANVSGSHRGSV  |
| S | 1        | 548  | 0.016109 | 0.000482 | -1.25568 | -2.47681 | Q9Z0V2   | Potassium Kcnd2      | PNANVSGSHRGSVQE  |
| S | 1        | 938  | 0.026832 | 0.002956 | 1.463137 | 2.2247   | Q08460   | Calcium-ac Kcnma1    | HGMLRQPSITTVNI   |
| S | 1        | 479  | 0.024108 | 0.0491   | 0.754381 | 0.554351 | B7ZBW2   | Potassium Kcnq2      | GAASRQNSSEASLPG  |
| S | 1        | 47   | 0.000144 | 0.975143 | -3.16031 | 0.045538 | Q6ZPR4   | Potassium Kcnt1      | RGGGSVGSVDVQVRVQ |
| S | 0.977506 | 178  | 0.039189 | 0.159934 | -1.52911 | -0.86222 | Q6WVG3   | BTB/POZ d Kctd12     | GASAGAPSPTELELAS |
| S | 0.935653 | 200  | 0.008542 | 0.578214 | -4.43532 | -0.78294 | Q6WVG3   | BTB/POZ d Kctd12     | AGPLLTQPSQLDGSR  |
| S | 1        | 221  | 0.451015 | 0.030018 | 0.308081 | -0.8155  | Q7TSH8   | Uncharacti Kiaa0195  | GDLFPFPSPPPSPRG  |
| S | 1        | 225  | 0.451015 | 0.030018 | 0.308081 | -0.8155  | Q7TSH8   | Uncharacti Kiaa0195  | PPFPSPSPRGEVGR   |
| S | 1        | 275  | 0.012473 | 0.91136  | -1.22403 | 0.091165 | Q8ROA7   | Uncharacti Kiaa0513  | TKTVMISPEDEQKQ   |
| T | 1        | 47   | 0.034962 | 0.30425  | -2.24762 | -0.91164 | Q80TL4   | Protein Kif Kiaa1045 | LPGSRRTGTVEGVSQE |
| S | 1        | 180  | 0.023744 | 0.056313 | -1.20461 | -0.84663 | Q148V7   | LisH doma Kiaa1468   | GQLNRRAGSITLDSL  |
| S | 1        | 966  | 0.009067 | 0.86287  | -1.5712  | -0.13771 | A2A7S8-2 | Uncharacti Kiaa1522  | QLERPVSPEAQADL   |
| S | 1        | 205  | 0.027359 | 0.981615 | -1.80796 | -0.07272 | Q8BRV5   | Uncharacti Kiaa1671  | KSPRRDESDEEPPRV  |
| S | 1        | 1578 | 0.001273 | 0.834006 | -1.50731 | 0.094601 | E9Q9B7   | Kidins220            | KAERVAKSPEHSVEP  |
| S | 0.99985  | 1660 | 0.020008 | 0.566622 | -2.57206 | -0.57195 | Q9QXL2   | Kinesin-liki Kif21a  | NLQDQQLSDTDGLGE  |
| S | 0.998655 | 1217 | 0.025628 | 0.542062 | -1.08117 | 0.267907 | Q9QXL1   | Kinesin-liki Kif21b  | SRGATDTSPLTRRKS  |
| S | 0.993818 | 545  | 0.035009 | 0.890346 | -3.6732  | -0.40132 | P28740-1 | Kinesin-liki Kif2a   | GGSRPDLSPSYDYDD  |
| T | 1        | 396  | 0.042729 | 0.503546 | -1.14828 | 0.350047 | P28738   | Kinesin he: Kif5c    | SLEPCDNTPIIDNIT  |
| S | 1        | 151  | 0.026326 | 0.889697 | -2.5507  | 0.258805 | Q91YS4   | Klc2                 | RKLDEDASPNEEKGD  |
| S | 1        | 60   | 0.00782  | 0.417766 | -1.44393 | 0.329301 | Q35344   | Importin si Kpna3    | QEELEDSDVDADFK   |
| S | 1        | 60   | 0.0108   | 1        | -2.36484 | -0.00024 | Q35343   | Importin si Kpna4    | QEDICEDSDIDGDYR  |
| S | 1        | 518  | 0.022732 | 0.41105  | -3.06209 | -0.9196  | Q61097   | Kinase sup Ksr1      | EEPEAGKSEAEDDEE  |
| S | 1        | 81   | 0.020567 | 0.895775 | -1.27947 | 0.117978 | Q6ZQ58   | La-related Larp1     | AAEAPAGSDGEDGGR  |
| S | 1        | 739  | 0.000678 | 0.375711 | -1.92785 | -0.27439 | Q6A0A2   | La-related Larp4b    | EQNTPPKSPQ_____  |
| S | 1        | 299  | 0.009489 | 0.648279 | -1.48671 | -0.23555 | Q8C351   | Layilin Layn         | YNVIRKQSEADLAEP  |
| S | 1        | 631  | 0.049043 | 0.381676 | -2.74961 | -1.07247 | Q5XJE5   | RNA polyr Leo1       | LKAKKLNSDEEGESS  |
| S | 1        | 659  | 0.001474 | 0.56112  | -1.81574 | -0.22224 | Q5XJE5   | RNA polyr Leo1       | KHKKYVSDDEEEED   |
| S | 0.85895  | 371  | 0.006484 | 0.960575 | -1.12879 | -0.04695 | Q9ERG0   | LIM domai Lima1      | RITSSLPESSPKTAK  |
| S | 0.912144 | 523  | 0.838579 | 0.001582 | -0.20291 | -2.50758 | D3YU59   | LIM and ca Limch1    | IASAGTGSPIKITP   |
| S | 0.999999 | 390  | 0.276185 | 0.008246 | 0.590085 | 1.595262 | P48678   | Prelamin-1 Lmna      | EEERLRLSPSPTSQR  |
| S | 0.999907 | 392  | 0.008371 | 0.778543 | -1.64897 | -0.18763 | P48678   | Prelamin-1 Lmna      | ERLRLSPSPTSQRSR  |
| S | 1        | 411  | 0.01028  | 0.768333 | -1.02837 | 0.126358 | Q7TQ95   | Protein lur Lnp      | SPVLRADSVPNLEPS  |
| S | 1        | 982  | 0.000818 | 0.672378 | 2.742587 | 0.238931 | E9Q3Y4   | Lipopolysa Lrba      | DRKDSPISPHFTRNS  |
| S | 1        | 660  | 0.004987 | 0.023448 | -2.04368 | -1.25421 | Q8R4U7   | Leucine zif Luzp1    | SGREKPDSDDDLDIE  |
| S | 1        | 280  | 0.019132 | 0.966217 | -1.13762 | -0.05686 | E9QA63   | Microtubu Macf1      | AEDVDVSPDEKSVI   |
| S | 1        | 3883 | 0.014777 | 0.052724 | -1.54816 | -0.98307 | E9QA63   | Microtubu Macf1      | SLLRQKQGSFSEVIS  |
| S | 1        | 266  | 0.042735 | 0.861711 | -1.49091 | 0.195991 | Q3UYG8   | O-acetyl-A Macro2    | GPEPKGLSPPHKSK   |
| S | 1        | 1229 | 0.164024 | 0.005188 | -1.62883 | -3.87501 | A2AGQ7   | Madd                 | PKEKPAGSPIRSSD   |
| S | 0.99999  | 1038 | 4.63E-06 | 0.868891 | -6.94914 | -0.11978 | A2AGQ7   | Madd                 | EPDKRKRSPTEENVNT |
| S | 0.994094 | 547  | 0.002381 | 0.010988 | -1.73402 | -1.09026 | P20917   | Myelin-ass Mag       | KNVTESSSFSGGDNP  |
| S | 0.994094 | 547  | 0.002381 | 0.010988 | -1.73402 | -1.09026 | P20917-2 | Myelin-ass Mag       | KNVTESSSFSGGDNP  |
| S | 0.994094 | 547  | 0.734337 | 0.03516  | -0.82148 | -3.57958 | P20917   | Myelin-ass Mag       | KNVTESSSFSGGDNP  |
| S | 0.994094 | 547  | 0.81418  | 0.045766 | -0.82148 | -4.1352  | P20917-2 | Myelin-ass Mag       | KNVTESSSFSGGDNP  |
| S | 1        | 667  | 0.001207 | 0.578112 | -2.08765 | -0.23732 | Q9QYR6   | Microtubu Map1a      | EMEEVHPSDEEEET   |
| S | 1        | 1606 | 0.000185 | 0.959583 | -2.01575 | -0.03928 | Q9QYR6   | Microtubu Map1a      | RALGLEESSPEEEGKA |
| S | 1        | 644  | 0.016398 | 0.842759 | -2.26285 | -0.24785 | Q9QYR6   | Microtubu Map1a      | IAAAREESEPEVKED  |
| S | 1        | 908  | 0.000593 | 0.002431 | -1.20303 | -0.79341 | Q9QYR6   | Microtubu Map1a      | EEDKGFKSPPCEDFS  |
| S | 0.996349 | 384  | 0.006324 | 0.193694 | -2.48725 | -0.8171  | Q9QYR6   | Microtubu Map1a      | PERVRTESSEALKAE  |
| S | 1        | 1205 | 0.370845 | 0.048975 | 0.390101 | 0.785767 | Q9QYR6   | Microtubu Map1a      | DISSKQLSPESLGLT  |
| S | 1        | 2162 | 0.018393 | 0.157374 | -1.30102 | -0.60335 | Q9QYR6   | Microtubu Map1a      | PSPAEPSPAPCGSLA  |
| S | 0.999989 | 1023 | 0.001232 | 0.72312  | -4.32406 | 0.367787 | Q9QYR6   | Microtubu Map1a      | PQDFQEDSWGDTKHA  |

|   |          |      |          |          |          |          |          |                     |                  |
|---|----------|------|----------|----------|----------|----------|----------|---------------------|------------------|
| S | 0.999465 | 895  | 0.005839 | 0.328973 | -0.80251 | 0.199061 | Q9QYR6   | Microtubu Map1a     | VPSAGTISPTSSLEE  |
| T | 1        | 633  | 3.98E-05 | 0.320549 | -3.09441 | 0.269311 | Q9QYR6   | Microtubu Map1a     | KPREALTPENIAAAA  |
| T | 0.999991 | 504  | 0.026381 | 0.985295 | -5.49895 | 0.195601 | Q9QYR6   | Microtubu Map1a     | ELSEPRTPPAQKGA   |
| S | 0.985263 | 1634 | 0.027212 | 0.999094 | -4.09864 | -0.03628 | Q9QYR6   | Microtubu Map1a     | VQGWRETSPTRGPEV  |
| S | 1        | 1205 | 0.011458 | 0.047236 | 1.575836 | 0.970665 | Q9QYR6   | Microtubu Map1a     | DISSKQLSPESLGLT  |
| S | 1        | 1208 | 0.01513  | 0.066866 | 1.575836 | 0.936628 | Q9QYR6   | Microtubu Map1a     | SKQLSPESLGLTLQFG |
| S | 1        | 1218 | 0.000769 | 0.004451 | 1.91684  | 1.166218 | Q9QYR6   | Microtubu Map1a     | TLQFGELSLGKEEK   |
| S | 1        | 995  | 0.015295 | 0.054938 | 5.44373  | 3.444177 | Q9QYR6   | Microtubu Map1a     | KMASPPSPGPPSAAH  |
| S | 0.961767 | 898  | 0.047154 | 0.124991 | 1.04539  | 0.682681 | Q9QYR6   | Microtubu Map1a     | AGTISPTSSLEEDKG  |
| S | 0.992914 | 899  | 0.04105  | 0.126474 | 1.028149 | 0.642482 | Q9QYR6   | Microtubu Map1a     | GTISPTSSLEEDKGF  |
| S | 1        | 1523 | 0.007024 | 0.874847 | -1.37184 | -0.10755 | P14873   | Microtubu Map1b     | SISEGTVSDKSATPV  |
| S | 0.999476 | 1815 | 0.015019 | 0.389297 | -0.85749 | 0.240401 | P14873   | Microtubu Map1b     | AAHQASSPPIDAAT   |
| S | 1        | 974  | 0.022444 | 0.744169 | -3.77224 | 0.599468 | P14873   | Microtubu Map1b     | SPTEDDESAAKAEADV |
| S | 1        | 2068 | 0.000401 | 0.620198 | -7.52032 | 0.625405 | P14873   | Microtubu Map1b     | CYTTEKKSPEARQD   |
| S | 1        | 1775 | 0.046073 | 0.980928 | -2.50306 | -0.11852 | P14873   | Microtubu Map1b     | SLEGEKLSPKSDISP  |
| S | 1        | 1781 | 0.010305 | 0.556226 | -1.50941 | 0.289945 | P14873   | Microtubu Map1b     | LSPKSDISLTPRES   |
| S | 1        | 2267 | 0.001347 | 0.522994 | -2.12777 | -0.27312 | P14873   | Microtubu Map1b     | KSKPLAASPKPGALK  |
| S | 0.983029 | 2094 | 0.000393 | 0.966134 | -3.982   | 0.082898 | P14873   | Microtubu Map1b     | KHPKTELSPSFINPN  |
| T | 1        | 905  | 9.93E-06 | 0.687287 | -2.5919  | 0.088138 | P14873   | Microtubu Map1b     | GEGECEQTPEEELPV  |
| T | 1        | 1629 | 0.023046 | 0.176363 | -1.56502 | -0.73459 | P14873   | Microtubu Map1b     | PKTAKSRTPVKEQHRS |
| S | 0.999878 | 608  | 0.009305 | 0.179568 | -1.17262 | -0.43573 | P14873   | Microtubu Map1b     | SVTEKEVSSVEEQSP  |
| S | 1        | 1508 | 0.614863 | 0.02171  | 0.370008 | -1.42481 | P14873   | Microtubu Map1b     | IDVSQFGSFKEDTKM  |
| S | 1        | 1395 | 0.032496 | 0.306121 | 0.782151 | 0.309882 | P14873   | Microtubu Map1b     | KVLSPLRSPLLGSE   |
| S | 1        | 1391 | 0.032496 | 0.306121 | 0.782151 | 0.309882 | P14873   | Microtubu Map1b     | SPVEKVLSPRSPPL   |
| S | 1        | 1247 | 0.031232 | 0.268251 | 1.032693 | 0.434021 | P14873   | Microtubu Map1b     | DVSDERLSPAKSPSL  |
| S | 1        | 1251 | 0.031232 | 0.268251 | 1.032693 | 0.434021 | P14873   | Microtubu Map1b     | ERLSPAKSPSLSPSP  |
| S | 1        | 1161 | 0.04607  | 0.893094 | -1.06679 | -0.12421 | P20357   | Microtubu Map2      | DEGKKTSPETSLIQ   |
| S | 0.999998 | 447  | 0.011457 | 0.100157 | -2.72137 | -1.32424 | P20357   | Microtubu Map2      | LDEKSTVSIEEAVAK  |
| S | 0.999982 | 520  | 0.016572 | 0.682454 | -1.58104 | -0.2677  | P20357   | Microtubu Map2      | KTLGKVTSEPEAVSE  |
| T | 1        | 1620 | 0.030114 | 0.50566  | -1.38568 | 0.381931 | P20357   | Microtubu Map2      | YSSRTPGTPGTPSY   |
| T | 0.999458 | 1260 | 0.03044  | 0.017834 | -1.72282 | -1.77255 | P20357   | Microtubu Map2      | KLLFRSDTLQISDLL  |
| S | 0.999395 | 1796 | 0.720608 | 0.001785 | 0.399309 | -3.44446 | P20357   | Microtubu Map2      | VASPRRLSNVSSSGS  |
| T | 0.999834 | 1609 | 0.00031  | 0.000354 | 2.962518 | 2.577767 | P20357   | Microtubu Map2      | STAITPGTPPSYSSR  |
| S | 1        | 1161 | 0.045656 | 0.252959 | 2.109955 | 1.015511 | P20357   | Microtubu Map2      | DEGKKTSPETSLIQ   |
| S | 0.997436 | 1165 | 0.014064 | 0.057371 | 2.818018 | 1.723573 | P20357   | Microtubu Map2      | KETSPETSLIQDEVA  |
| T | 0.999999 | 43   | 0.048594 | 0.343414 | -2.14509 | -0.89124 | Q60700   | Mitogen-a Map3k12   | CTPEKDLTPTQCCLR  |
| S | 1        | 667  | 0.023536 | 0.971555 | -1.39    | 0.06711  | P27546-3 | Microtubu Map4      | MIKTPSPKPKAKP    |
| S | 0.999371 | 261  | 0.00219  | 0.436623 | -1.97188 | 0.326122 | Q7TSJ2   | Microtubu Map6      | KPLPPAQSQTQEGGP  |
| S | 1        | 544  | 0.003611 | 0.302081 | -0.87053 | 0.202991 | A2AJI0   | MAP7 dor Map7d1     | KEPAAPASPAPSPVP  |
| S | 1        | 401  | 0.004906 | 0.979164 | -3.40329 | -0.09573 | A2AJI0   | MAP7 dor Map7d1     | RKPGAGGSPALARRR  |
| S | 1        | 460  | 0.00342  | 0.843288 | -2.34357 | 0.176857 | A2AJI0   | MAP7 dor Map7d1     | LSTGSELSPKSKARP  |
| S | 1        | 357  | 0.004811 | 0.083609 | -1.35514 | 0.570944 | A2AG50   | MAP7 dor Map7d2     | AKPTYLGSVPKYYFP  |
| S | 0.995086 | 415  | 0.00165  | 0.52126  | -2.94032 | 0.3956   | Q80W82   | Mitogen-a Mapk10    | GVVKGQSPSAQVQQ   |
| S | 1        | 28   | 2.08E-05 | 0.960806 | -2.84229 | -0.03485 | Q9WV19   | C-Jun-amir Mapk8ip1 | FLGLHIASPPNFRLT  |
| T | 1        | 42   | 0.040873 | 0.999586 | -4.42892 | -0.02964 | P10637-5 | Microtubu Mapt      | EEAGIGDTPNQEDQA  |
| S | 0.999929 | 486  | 0.035171 | 0.435183 | 1.248125 | 0.404588 | A2A5Y6   | Microtubu Mapt      | IPAKTTPSPKTPPGS  |
| T | 1        | 489  | 0.035171 | 0.435183 | 1.248125 | 0.404588 | A2A5Y6   | Microtubu Mapt      | KTTPSPKTPPGSGEP  |
| S | 1        | 704  | 0.04203  | 0.982618 | 0.894724 | 0.039367 | A2A5Y6   | Microtubu Mapt      | GAEIVYKSPVVS     |
| S | 1        | 708  | 0.037476 | 0.986671 | 0.918697 | 0.034214 | A2A5Y6   | Microtubu Mapt      | VYKSPVVS         |
| S | 1        | 112  | 0.001992 | 0.545634 | -0.73742 | 0.099077 | P26645   | Myristoyla Marcks   | EAEPAPSSPAEAE    |
| S | 1        | 113  | 0.001992 | 0.545634 | -0.73742 | 0.099077 | P26645   | Myristoyla Marcks   | AEPAPSSPAEAE     |
| T | 1        | 79   | 0.001682 | 0.996054 | -1.59992 | 0.015314 | P26645   | Myristoyla Marcks   | PASGSAATPAAAEKD  |
| S | 1        | 22   | 0.003081 | 0.049159 | -1.72058 | -0.77196 | P28667   | MARCKS-rr Marcks1   | AEEAAGASPAKANGQ  |
| T | 1        | 85   | 0.008128 | 0.160598 | -2.0072  | -0.75586 | P28667   | MARCKS-rr Marcks1   | GEVAAKTPKPKKKK   |
| T | 0.985734 | 613  | 0.022353 | 0.98707  | -1.54766 | 0.049384 | Q8VHJ5   | Serine/thri Mark1   | RGSSSRSTFHGEQLR  |
| S | 1        | 1414 | 0.018421 | 0.999671 | -1.81916 | 0.008764 | Q9R1L5   | Microtubu Mast1     | ALAKAALSPVQEHET  |
| S | 0.998783 | 1112 | 0.922332 | 0.02887  | -0.22499 | 2.092567 | Q9R1L5   | Microtubu Mast2;Ma  | SLLHTSRSLSSLNRS  |
| S | 0.979775 | 935  | 0.009215 | 0.008536 | 0.867204 | 0.789944 | E9Q8S5   | Microtubu Mast3     | NPSSRDSSPRDPSP   |
| S | 0.99999  | 2517 | 0.003422 | 0.340286 | -0.95759 | 0.20614  | Q811L6   | Microtubu Mast4     | SQMIKSDSLPSFRLS  |
| S | 1        | 139  | 0.010109 | 0.400955 | -1.5411  | 0.384428 | P04370-4 | Myelin bas Mbp      | GLSLSRFSWGAEGQK  |

|   |          |      |          |          |          |          |          |             |          |                  |
|---|----------|------|----------|----------|----------|----------|----------|-------------|----------|------------------|
| T | 1        | 174  | 0.018796 | 0.895747 | -3.46519 | 0.312267 | P04370-4 | Myelin bas  | Mbp      | GAYDAQGTLKIFKL   |
| S | 0.980749 | 547  | 0.003992 | 0.000233 | -1.29729 | -2.13874 | Q99J21   | Mucolipin-  | Mcoln1   | YIEQCQDSPTSQKFR  |
| S | 1        | 4827 | 0.004896 | 0.139977 | -1.16719 | -0.41204 | A2ANY6   |             | Mdn1     | HQDEKEDSEPEDVEQ  |
| S | 1        | 5012 | 0.024882 | 0.728698 | -1.19093 | -0.20186 | A2ANY6   |             | Mdn1     | EEEEGEQSDAAEQVP  |
| S | 1        | 438  | 0.040887 | 0.857202 | -3.56398 | -0.47112 | Q9Z2D6-2 | Methyl-Cp   | Mecp2    | EKMMPRGGSLESDGCP |
| T | 1        | 11   | 0.000523 | 0.44988  | -2.09221 | 0.248628 | D3Z183   | Major facil | Mfsd6    | DDKVAILTDDDEEQK  |
| S | 0.999996 | 1404 | 0.001326 | 0.001514 | 3.013807 | 2.619556 | Q8CJ19   | Protein-mε  | Mical3   | PPLLTPKSPDKELR   |
| S | 1        | 1406 | 0.003027 | 0.003965 | 2.490595 | 2.096343 | Q8CJ19   | Protein-mε  | Mical3   | LLTPKSPDKELRSS   |
| T | 1        | 785  | 0.002074 | 0.945869 | -2.01512 | 0.076384 | Q9JM52   | Misshaper   | Mink1    | FVLLKERTLDEAPKP  |
| S | 0.969406 | 766  | 0.027459 | 0.099549 | -3.99104 | -2.43044 | Q8VE19   | WD repeat   | Mios     | SQYGVSGSPTKSKVT  |
| S | 1        | 237  | 3.48E-05 | 0.337076 | -1.26664 | 0.10418  | Q99KX1   | Myeloid le  | Mlf2     | AIQGPEDSPSRQSR   |
| S | 0.999999 | 1719 | 0.036984 | 0.995741 | -1.99516 | 0.041688 | Q9QZQ1   | Afadin      | Mllt4    | YLKTQVLSPDSLFTA  |
| S | 0.999996 | 1083 | 0.003093 | 0.736781 | -1.39391 | -0.14049 | Q9QZQ1   | Afadin      | Mllt4    | ELMTRTSSVVVLEVA  |
| S | 1        | 85   | 0.038815 | 0.495853 | -1.4871  | 0.447031 | Q9D2P8   | Myelin-ass  | Mobp     | PKHQPAASPVVVRAP  |
| S | 0.999917 | 38   | 0.005528 | 0.639497 | -0.74217 | 0.105384 | Q9CWE0   | Mitochonc   | Mtfr1l   | LKPCPRASFETLPNI  |
| S | 1        | 58   | 0.038103 | 0.999485 | -1.48755 | -0.01089 | Q9Z2D1   | Myotubulε   | Mtmr2    | STSADNFSPDLRVL   |
| S | 1        | 575  | 0.008024 | 0.768916 | -1.56296 | -0.18073 | Q6P9S0   | MTSS1-like  | Mtss1l   | VGPTRAGSEECVFYT  |
| S | 1        | 419  | 0.039002 | 0.996692 | -1.72999 | -0.03232 | Q6P9S0   | MTSS1-like  | Mtss1l   | MVLTRGLSLEHQKSS  |
| S | 0.993195 | 307  | 0.031593 | 0.99152  | -2.15838 | -0.06104 | Q6KAU4   | Multivesic  | Mvb12b   | AAARLPPSPTRCQOI  |
| S | 0.964721 | 199  | 0.042597 | 0.6106   | 0.749215 | -0.1884  | Q6KAU4   | Multivesic  | Mvb12b   | VPRNHDSQPPTTSPQ  |
| T | 1        | 3954 | 0.008154 | 0.689153 | -2.70766 | -0.38013 | Q7TPH6   | E3 ubiquiti | Mycbp2   | ISGDAEPTQEETKEA  |
| S | 1        | 214  | 0.18915  | 0.000719 | -0.78392 | -3.05561 | Q5SV64   |             | Myh10    | DHNIPQESPKPVKPK  |
| S | 1        | 1973 | 0.033175 | 0.911205 | -2.55832 | 0.245538 | Q6URW6   | Myosin-14   | Myh14    | RLEEGVASDEEEAEG  |
| S | 1        | 1943 | 0.046788 | 0.381233 | -1.04363 | -0.40183 | Q8VDD5   | Myosin-9    | Myh9     | RKGTGDCSDEEVDGK  |
| S | 1        | 20   | 0.005793 | 0.367206 | -2.77427 | -0.64277 | Q3THE2   | Myosin reε  | Myl12b;M | KRPQRATSNVFMFMD  |
| S | 1        | 1460 | 0.01655  | 0.994852 | -2.5452  | 0.047298 | Q6PDN3   | Myosin ligl | Mylk     | PKDEVEVSDDDEKPEP |
| S | 1        | 2028 | 0.003625 | 0.996788 | -1.5168  | 0.015524 | Q9JMH9-6 | Unconvent   | Myo18a   | KPLAPDPSDDEHDPV  |
| S | 1        | 1259 | 0.002877 | 0.38678  | -1.44729 | -0.27665 | Q8C170   | Unconvent   | Myo9a    | IVRQRPKSLEDLHQK  |
| S | 1        | 2138 | 0.002525 | 0.023548 | -5.26673 | -2.7695  | P70670   | Nascent pc  | Naca     | TPTVQEESSEEEVDE  |
| S | 1        | 284  | 0.784821 | 0.029518 | 0.26052  | -1.35751 | Q9CWZ7   | Gamma-sc    | Napg     | GGGIKKSPATPQAK   |
| S | 0.97915  | 999  | 0.017593 | 0.23545  | 6.708202 | 2.585529 | Q9EPN1   | Neurobear   | Nbea     | EIEDLSQSQSPSESET |
| T | 0.999446 | 795  | 0.9766   | 0.042093 | 0.086655 | -1.35397 | Q35136   | Neural cell | Ncam2    | VNEPNETTLPTEPEK  |
| S | 0.999281 | 22   | 0.017205 | 0.1796   | -3.48799 | -1.50727 | Q3UYV9   | Nuclear ca  | Ncbp1    | PHKRRKTSANETED   |
| S | 0.99837  | 286  | 0.023825 | 0.788097 | -2.41655 | -0.34721 | Q9ESJ4   | NCK-intera  | Nckipsd  | LEAQDALSPETTEEK  |
| S | 1        | 403  | 0.010271 | 0.003931 | -1.32831 | -1.4863  | P09405   | Nucleolin   | Ncl      | TLLAKNLSFNITEDE  |
| S | 1        | 215  | 0.640362 | 0.022217 | -0.17988 | -0.72336 | Q9ERR1   | Nuclear di: | Ndel1    | SAVQASLSLPAVPGV  |
| T | 1        | 219  | 0.640362 | 0.022217 | -0.17988 | -0.72336 | Q9ERR1   | Nuclear di: | Ndel1    | ASLSLPATPVKGTGE  |
| S | 1        | 2    | 0.027909 | 0.360504 | -1.45021 | -0.50114 | Q62433   | Protein NC  | Ndrg1    | _____MSRELHDVD   |
| S | 1        | 332  | 0.013383 | 0.650987 | -1.81972 | -0.31175 | Q9QYG0   | Protein NC  | Ndrg2    | LSRRTASLTSAAASI  |
| T | 0.999379 | 20   | 0.009822 | 0.975078 | -1.70282 | 0.061747 | Q9QYG0   | Protein NC  | Ndrg2    | KPLLPQGTPETAKEA  |
| S | 1        | 342  | 0.015522 | 0.196395 | -3.74235 | -1.51709 | Q9QYG0   | Protein NC  | Ndrg2    | SAASIDGSRSRRTL   |
| S | 0.999296 | 334  | 0.041139 | 0.060448 | 1.76778  | 1.412431 | Q9QYF9   | Protein NC  | Ndrg3    | SRTHSTSSSIGSGES  |
| T | 0.809258 | 308  | 0.036548 | 0.106798 | -2.10106 | 1.350014 | Q8BTG7   | Protein NC  | Ndrg4    | AVPSASMTRLARSRT  |
| S | 1        | 480  | 0.025902 | 0.996011 | -0.7259  | 0.013324 | E9PXB7   | E3 ubiquiti | Nedd4l   | DTLSNPQSPQSPYPN  |
| S | 1        | 508  | 0.00948  | 0.762179 | -1.7355  | 0.212548 | P19246   | Neurofilan  | Nefh     | PPAEAAASPEKETKS  |
| S | 1        | 809  | 0.006824 | 0.691582 | -2.23083 | 0.298754 | P19246   | Neurofilan  | Nefh     | KPPAEAKSPEKAKSP  |
| S | 1        | 769  | 0.036768 | 0.906981 | -1.85617 | 0.187941 | P19246   | Neurofilan  | Nefh     | KSPIEVKSPEKAKTP  |
| S | 1        | 631  | 4.86E-05 | 0.917159 | -6.09326 | -0.13154 | P19246   | Neurofilan  | Nefh     | KSPAFAKSPAFAKSP  |
| S | 1        | 637  | 0.000069 | 0.918113 | -5.70623 | -0.13154 | P19246   | Neurofilan  | Nefh     | KSPAFAKSPATVKSP  |
| S | 1        | 679  | 0.017999 | 0.988544 | -3.17332 | -0.09009 | P19246   | Neurofilan  | Nefh     | KSPAFAKSPGFAKSP  |
| S | 1        | 619  | 0.027075 | 0.465261 | -2.2347  | 0.641288 | P19246   | Neurofilan  | Nefh     | KSPAFAKSPAFAKSP  |
| S | 1        | 655  | 0.046455 | 0.902558 | -1.8344  | 0.203542 | P19246   | Neurofilan  | Nefh     | KSPFAKSPAFAKSP   |
| S | 1        | 589  | 0.008838 | 0.990027 | -3.59179 | -0.07984 | P19246   | Neurofilan  | Nefh     | KSPATVKSPEKAKSP  |
| S | 1        | 595  | 0.034487 | 0.991194 | -2.70413 | -0.07984 | P19246   | Neurofilan  | Nefh     | KSPGFAKSPAFAKSP  |
| S | 1        | 553  | 0.029559 | 0.981823 | -2.46091 | 0.100477 | P19246   | Neurofilan  | Nefh     | KSPGFAKSPAFAKSP  |
| S | 1        | 605  | 0.160474 | 0.038504 | -2.10757 | 3.009043 | P08553   | Neurofilan  | Nefm     | EKPEFAKSPMPKSPV  |
| S | 1        | 502  | 0.033522 | 0.731935 | -1.85345 | -0.33777 | P08553   | Neurofilan  | Nefm     | EEPEFAKSPVKSPEA  |
| S | 1        | 769  | 0.003302 | 0.244436 | -2.28949 | -0.58323 | P08553   | Neurofilan  | Nefm     | VTNGLDVSFAEKKKG  |
| S | 0.999996 | 30   | 0.044583 | 0.94541  | -2.369   | 0.190832 | P08553   | Neurofilan  | Nefm     | SFSRVSGSPSSGFRS  |
| S | 0.999972 | 1071 | 0.032508 | 0.728758 | -1.13925 | 0.207438 | P51954   | Serine/thr  | Nek1     | EQPGDEYSEEEESVL  |

|   |          |      |          |          |          |          |          |                      |                  |
|---|----------|------|----------|----------|----------|----------|----------|----------------------|------------------|
| S | 1        | 904  | 0.042632 | 0.79416  | 1.077235 | 0.178281 | Q5NCX5   | Neuralized Neur14    | SNTATEKSFPLHSPV  |
| S | 1        | 909  | 0.042632 | 0.79416  | 1.077235 | 0.178281 | Q5NCX5   | Neuralized Neur14    | EKSFPLHSPVAGVAH  |
| S | 0.999998 | 2804 | 0.014718 | 0.995902 | -1.42958 | -0.02301 | Q04690   | Neurofibrc Nf1       | DRNVELSPTAGHCN   |
| S | 0.969001 | 51   | 0.00091  | 0.785181 | -1.65152 | -0.11232 | B1AY10   | Transcripti Nfx1     | GRRNYSSSPCHLPR   |
| S | 1        | 606  | 0.009167 | 0.656733 | -1.55372 | 0.240018 | Q8CHT1   | Ephexin-1 Ngef       | NRRTKFVSFTRSLLD  |
| T | 0.998623 | 299  | 0.026316 | 0.226559 | 2.569793 | -1.11949 | Q91VE6   | MKI67 FH/ Nifk       | VKEDTQKTPTSASPG  |
| S | 1        | 38   | 0.022794 | 0.996089 | -0.72044 | -0.01266 | O70311   | Glycylpept Nmt2      | ETEHAKGSPGGDLGA  |
| S | 1        | 563  | 0.022544 | 0.135496 | -3.62309 | -1.87575 | E9Q5C9   | Nolc1                | NGKAAKESEEEEEEE  |
| S | 1        | 513  | 0.006388 | 0.440109 | -1.06597 | 0.223252 | Q9D6Z1   | Nucleolar j Nop56    | APKEELASDLEEMAT  |
| S | 1        | 509  | 0.04081  | 0.690855 | -2.24824 | 0.475145 | Q6DFW4   | Nucleolar j Nop58    | HIKEEPLSEEEPCTS  |
| S | 1        | 892  | 0.015995 | 0.943065 | -1.50277 | -0.0941  | F8WGF2   | Nitric oxidr Nos1    | YSDSRKSSGDGPDLR  |
| S | 1        | 125  | 0.002069 | 0.003373 | -4.10746 | -3.29581 | Q61937   | Nucleophc Npm1       | AVEEDAEESEDEEED  |
| S | 1        | 20   | 0.003262 | 0.578683 | -3.16516 | -0.44716 | Q91V36   | Nuclear re Nrbp2     | EREREDESEDESIL   |
| S | 1        | 1178 | 0.001192 | 0.207658 | -2.2597  | -0.49622 | Q810U4   | Neuronal c Nrcam     | DGTFGEYSDAEDHKP  |
| S | 1        | 85   | 0.005506 | 0.371586 | -2.07399 | -0.47135 | Q8BHG1   | Nardilysin Nrd1      | ARLGADESEEEGRSF  |
| S | 1        | 207  | 0.02498  | 0.995401 | -1.82689 | -0.03567 | P46460   | Vesicle-fus Nsf      | KTKENRQSIINPDWN  |
| S | 1        | 31   | 0.006186 | 0.644973 | -1.91932 | 0.276702 | Q5NCR9   | Nuclear sp Nsrp1;Ccd | QKPSVFGSDSDDEDET |
| S | 1        | 33   | 0.016654 | 0.984772 | -2.07251 | 0.066621 | Q5NCR9   | Nuclear sp Nsrp1;Ccd | PSVFGSDSDDEDETV  |
| S | 1        | 368  | 0.008684 | 0.876994 | -1.85415 | -0.15137 | Q02819   | Nucleobinr Nucb1     | NARAQRLSQVTEALG  |
| S | 1        | 181  | 0.009754 | 0.398169 | -1.41025 | 0.350424 | Q80XU3   | Nuclear ub Nucks1    | LKATVTPSPVKEKAK  |
| S | 1        | 113  | 0.00163  | 0.257242 | -2.00173 | -0.4255  | Q80XU3   | Nuclear ub Nucks1    | MLEDLSESEEEPEED  |
| S | 1        | 58   | 0.416444 | 0.028366 | 1.083623 | -2.74733 | Q80XU3   | Nuclear ub Nucks1    | GKNSQEDSEDESEK   |
| S | 0.985484 | 244  | 0.00034  | 0.73098  | -5.40283 | -0.34336 | Q9QZS3-2 | Protein nu Numb      | PSPSPSTPTPDGTA   |
| S | 1        | 411  | 5.51E-05 | 0.176596 | -4.44858 | -0.55113 | O08919   | Numb-like Numbl      | PGHKRTPSEAEERWLE |
| T | 1        | 279  | 0.016976 | 0.208011 | -1.89312 | 0.765355 | O08919   | Numb-like Numbl      | GEKGEAGTPVAAGTT  |
| S | 1        | 238  | 0.026144 | 0.91488  | -1.11705 | 0.098277 | Q3B7Z2   | Oxysterol- Osbp      | TALQRSLSELESLKL  |
| S | 0.844783 | 58   | 0.043099 | 0.383114 | -1.01051 | -0.37878 | S4R1M9   | Oxysterol- Osbpl10   | LGGGGRSSPGSVAA   |
| S | 1        | 214  | 0.019084 | 0.562195 | -1.00356 | 0.22223  | Q62422   | Osteoclast Ostf1     | DYLDDESD_____    |
| T | 0.999999 | 176  | 0.001384 | 0.972039 | -2.80881 | -0.06928 | Q4KMM3   | Oxidation   Oxr1     | AEFDKTTTDPVAHPK  |
| T | 1        | 72   | 0.003298 | 0.528964 | -2.66241 | 0.411924 | Q4KMM3   | Oxidation   Oxr1     | SELKRFYITDTGQKK  |
| S | 0.999999 | 346  | 0.00209  | 0.108372 | -3.19454 | -1.02279 | Q4KMM3   | Oxidation   Oxr1     | AFTSELSPIREELL   |
| T | 0.988976 | 175  | 0.286801 | 0.039457 | -0.92569 | -1.70994 | Q9DBN4   | Putative m P33monox  | HPASQAQSTPSTPHA  |
| S | 0.879487 | 779  | 0.001036 | 0.694699 | -1.15223 | 0.100667 | Q8K212   | Phosphofu Pacs1      | SLTVPSTSPSSSGL   |
| T | 1        | 181  | 0.036737 | 0.576533 | -1.25079 | -0.32133 | Q61644   | Protein kir Pacsin1  | SKTEQSVTEPQKQKL  |
| S | 0.999994 | 186  | 0.000823 | 0.954956 | -3.98949 | 0.112507 | Q61036   | Serine/thr Pak3      | PPLAPPVSEEEDEEE  |
| T | 1        | 141  | 0.040306 | 0.722891 | -1.3853  | 0.271488 | Q9Z0P4-2 | Paralemmi Palm       | TLVNAQQTPLGTPEKE |
| T | 1        | 145  | 0.00353  | 0.794969 | -1.25256 | 0.111444 | Q9Z0P4-2 | Paralemmi Palm       | AQQTPLGTPKENRTS  |
| S | 1        | 355  | 0.001288 | 0.353068 | -1.15201 | -0.19559 | Q8BR92   | Paralemmi Palm2      | SPEGKEESLATDPAP  |
| S | 1        | 42   | 0.019856 | 0.760807 | 1.336949 | 0.19734  | V9GX56   | Pank2                | DPLRRRASSAAPSGS  |
| S | 1        | 264  | 0.048495 | 0.949908 | -1.74034 | -0.13733 | P58501   | PAX3- and Paxbp1     | REDENDASDDEDDDE  |
| S | 1        | 788  | 0.022775 | 0.246495 | -1.13134 | 0.455868 | F7BJK1   | Pcdh1                | MSDAPGDSPRIHLPL  |
| S | 1        | 2288 | 0.040704 | 0.130812 | -0.74046 | -0.45589 | Q9QYX7   | Protein pic Pclo     | QTKEQPGSPHSVSGE  |
| S | 0.966368 | 4598 | 0.023857 | 0.002305 | -2.58104 | -4.02027 | Q9QYX7   | Protein pic Pclo     | PSPGQPGSPSVSKKK  |
| S | 1        | 3582 | 0.001375 | 0.234204 | -1.8207  | 0.390295 | Q9QYX7   | Protein pic Pclo     | KPLPDDISPVQLHP   |
| S | 0.999983 | 2502 | 0.033539 | 0.173312 | 0.993104 | 0.519121 | Q9QYX7   | Protein pic Pclo     | SPHSNKSSPRYSKSL  |
| S | 1        | 1766 | 0.010609 | 0.018972 | 1.314043 | 1.017354 | Q9QYX7   | Protein pic Pclo     | KTPPSNLSPIEDASP  |
| S | 0.999993 | 1772 | 0.010609 | 0.018972 | 1.314043 | 1.017354 | Q9QYX7   | Protein pic Pclo     | LSPIEDASPTHEELRQ |
| T | 1        | 1760 | 0.010609 | 0.018972 | 1.314043 | 1.017354 | Q9QYX7   | Protein pic Pclo     | RRRERPKTPPSNLSP  |
| S | 1        | 302  | 0.015817 | 0.202451 | -2.64852 | -1.06453 | P59913   | Protein-L-i Pcmtd1   | LIPQPLDSEDEKME   |
| S | 1        | 362  | 0.016259 | 0.987649 | -1.9428  | -0.05584 | P49586   | Choline-ph Pcyt1a    | RAVTCDISDEEED__  |
| S | 1        | 319  | 0.539527 | 0.01912  | 0.550027 | -1.90785 | P49586   | Choline-ph Pcyt1a    | QAISPQSPSSSPTH   |
| S | 0.985195 | 323  | 0.420704 | 0.012636 | 0.550027 | -1.72757 | P49586   | Choline-ph Pcyt1a    | PKQSPSSSPTHERSP  |
| S | 0.995366 | 232  | 0.003315 | 0.840521 | -2.90039 | 0.219547 | P35486   | Pyruvate d Pdha1     | NRYGMGTSVERAAAS  |
| S | 1        | 1359 | 0.020321 | 0.955191 | -3.15001 | 0.185011 | F8WHU5   | Pds5b                | AQQSRAESPTS SAVE |
| S | 0.999981 | 1255 | 0.01431  | 0.279078 | -1.16487 | 0.391874 | Q4VA53   | Sister chro Pds5b    | RKRGRITASDSEQQW  |
| S | 1        | 1356 | 0.044595 | 0.980426 | -3.89233 | 0.185011 | Q4VA53   | Sister chro Pds5b    | RAQQRAESPSSAVE   |
| S | 1        | 748  | 0.018578 | 0.578346 | -1.02733 | -0.21945 | Q99K01   | Pyridoxal-c Pdxcd1   | HDNLEAHSPEQPPRA  |
| S | 1        | 282  | 0.016752 | 0.962787 | -2.21269 | -0.11238 | Q69Z38   | Pseudopoc Peak1      | NFRANTLSPVRFVVS  |
| S | 1        | 426  | 0.001765 | 0.000138 | 2.280397 | 3.496955 | F8SLQ3   | PEX5-relat Pex5l     | LVKNKKGSPGLTRRM  |
| S | 0.999733 | 175  | 0.151844 | 0.0033   | -1.16155 | -2.97011 | Q8CAA7   | Glucose 1, Pgm2l1    | AGVMITASHNRKEDN  |

|   |          |      |          |          |          |          |          |                     |                  |
|---|----------|------|----------|----------|----------|----------|----------|---------------------|------------------|
| S | 1        | 181  | 9.62E-05 | 0.525704 | -1.34045 | -0.09839 | O55022   | Membrane Pgrmc1     | GEEPTVYSDDEEPKD  |
| T | 1        | 205  | 0.005054 | 0.741665 | -2.09992 | 0.233754 | Q80UU9   | Membrane Pgrmc2     | GEEPEYTDDEEDTKD  |
| S | 0.99934  | 91   | 0.000191 | 0.799272 | -1.63143 | 0.076697 | Q501J7-2 | Phosphata Phactr4   | IGSARSSSPVLVEEE  |
| S | 1        | 207  | 0.004128 | 0.478542 | -1.41346 | 0.250894 | E9Q3L2   | Pi4ka               | VSSISQVSPERGIPP  |
| S | 1        | 1204 | 0.009472 | 0.551145 | -2.00933 | 0.381655 | O35954   | Membrane Pitpnm1    | VDFLRKQSQLLRSRG  |
| T | 0.990822 | 287  | 0.040849 | 0.996459 | -3.04209 | -0.05959 | O35954   | Membrane Pitpnm1    | PGTSTAGTPDGPEAP  |
| S | 0.752697 | 397  | 0.017303 | 0.999666 | -3.02416 | 0.014457 | Q6ZPQ6   | Membrane Pitpnm2    | SEFRVASSVEQLNII  |
| S | 1        | 321  | 0.049662 | 0.829628 | -0.75389 | -0.11662 | Q3UHE1   | Membrane Pitpnm3    | SSKRLSKSNVDVSSG  |
| T | 1        | 231  | 0.015814 | 0.884065 | -1.67447 | -0.15312 | O55176   | E3 ubiquiti Pja1    | KPKVFFDTDDDDVDP  |
| S | 0.999909 | 536  | 0.015995 | 0.942906 | 1.090831 | 0.068408 | P70268   | Serine/thr Pkn1     | AVATGTFSPNASPGA  |
| S | 1        | 540  | 0.015995 | 0.942906 | 1.090831 | 0.068408 | P70268   | Serine/thr Pkn1     | GTFSPNASPGAIEIRH |
| S | 0.999999 | 220  | 0.022041 | 0.957846 | -2.32681 | 0.135214 | Q68FH0   | Plakophilin Pkp4    | SVPSRAQSPSYVTST  |
| S | 1        | 775  | 0.003845 | 0.001819 | -1.94003 | -2.04935 | Q68FH0   | Plakophilin Pkp4    | DDLLGKESPSKDSEP  |
| S | 1        | 514  | 0.017159 | 0.999971 | -2.54667 | 0.003591 | Q68FH0   | Plakophilin Pkp4    | TRSPSIDSIQKDPRE  |
| S | 1        | 394  | 0.032668 | 0.927864 | -1.13577 | -0.09713 | Q68FH0   | Plakophilin Pkp4    | SSYASQHSQLGQELR  |
| S | 0.974624 | 336  | 0.035619 | 0.774994 | -0.81711 | -0.13571 | Q68FH0   | Plakophilin Pkp4    | QGQVGVSSSPKRSGMT |
| S | 1        | 313  | 0.007594 | 0.978545 | -1.51189 | -0.04778 | Q68FH0   | Plakophilin Pkp4    | QTTTRVGSPLTLTDA  |
| S | 1        | 1197 | 0.031151 | 0.903118 | 1.392723 | 0.137735 | Q9Z1B3   | 1-phospha Plcb1     | AAKVNLSKSPSEIEE  |
| S | 1        | 1199 | 0.031151 | 0.903118 | 1.392723 | 0.137735 | Q9Z1B3   | 1-phospha Plcb1     | KVNLSKSPSEIEERE  |
| S | 1        | 676  | 0.005826 | 0.637557 | -1.07561 | 0.155184 | A2AP18-2 | 1-phospha Plch2     | SKIKKVASVEEGDET  |
| T | 1        | 557  | 0.000702 | 0.006508 | -3.55923 | -1.94607 | Q3USB7   | Inactive pI Plcl1   | DLLEGEVTEDEEAE   |
| S | 1        | 1324 | 0.042632 | 0.5754   | -1.52018 | 0.408101 | Q9QXS1-6 | Plectin Plec        | AQLEPVASPAKKPKV  |
| S | 0.999999 | 574  | 0.004215 | 0.979941 | -1.89319 | 0.050455 | E9Q6H8   | Plekha5             | TYRSEVTSPQRGDV   |
| T | 0.999997 | 116  | 0.037155 | 0.032834 | -2.43412 | -2.25281 | P60202   | Myelin prc Plp1     | CGKGLSATVTGGQKG  |
| S | 0.999999 | 726  | 0.029345 | 0.996641 | -0.99062 | 0.017248 | A2AJT4   | Arginine/si Pnir    | RTFCRSGSISVKVIR  |
| S | 1        | 306  | 0.01186  | 0.476749 | -3.2596  | -0.74355 | Q9EQ28   | DNA polyn Pold3     | RGKRVLDLDEEAKET  |
| S | 1        | 17   | 0.032368 | 0.677724 | -1.01588 | -0.20703 | B8QI35   | Liprin-alpha Ppfia3 | SEDGRRGSALGPDEA  |
| S | 1        | 683  | 0.026625 | 0.815192 | -4.47697 | -0.61051 | B8QI35   | Liprin-alpha Ppfia3 | TPRLAPPSPAREGTD  |
| S | 0.999998 | 435  | 0.020673 | 0.972466 | -2.48895 | -0.11426 | Q8C8U0   | Liprin-beta Ppfibp1 | SSLQKSSSLGNLKKE  |
| S | 1        | 939  | 0.049852 | 0.729875 | -3.65878 | -0.74981 | A2ARP1   | Inositol he Ppip5k1 | EMKTDPGSIENLCPG  |
| S | 1        | 545  | 0.007788 | 0.942083 | -1.14559 | -0.06077 | Q80TL0   | Protein ph Ppm1e    | GYEGRVDSFTDRTSL  |
| S | 1        | 157  | 0.035599 | 0.956052 | -2.52326 | 0.170382 | Q8R4S0   | Protein ph Ppp1r14c | IRGMRLKSPQKKSIV  |
| S | 1        | 156  | 0.014182 | 0.046271 | -0.87847 | 0.573646 | Q60829-2 | Protein ph Ppp1r1b  | GEEPQHPSPP_____  |
| S | 1        | 61   | 0.019608 | 0.021532 | -1.65076 | -1.44126 | Q60829-2 | Protein ph Ppp1r1b  | NLSENAQASEEDELG  |
| S | 1        | 54   | 0.001073 | 0.084357 | 0.854679 | 0.257634 | A2AJW4   | Protein ph Ppp1r3d  | IIQRRSRLPTSPER   |
| S | 0.996712 | 58   | 0.001073 | 0.084357 | 0.854679 | 0.257634 | A2AJW4   | Protein ph Ppp1r3d  | RSRSLPTSPERRAKA  |
| S | 1        | 81   | 0.014772 | 0.639123 | -1.06946 | 0.192237 | Q9CW07   | Protein ph Ppp1r3g  | ELRARSFSLPADPIL  |
| S | 0.999733 | 75   | 0.033457 | 0.986606 | -3.62293 | 0.131072 | Q9CW07   | Protein ph Ppp1r3g  | RLQEVRRSRARSFSL  |
| S | 1        | 497  | 0.10563  | 0.049413 | 1.097352 | 1.248908 | Q60996   | Serine/thr Ppp2r5c  | RPLVRRKSELQDPH   |
| S | 1        | 81   | 0.002643 | 0.07861  | 1.279812 | 0.480642 | Q91V89   | Ppp2r5d             | KKERRQSSFPFNLNK  |
| S | 1        | 565  | 0.005393 | 0.412546 | -1.74949 | -0.36909 | Q91V89   | Ppp2r5d             | KVLLRRKSELQPDVY  |
| S | 1        | 80   | 0.006533 | 0.009149 | 1.556349 | 1.285638 | Q91V89   | Ppp2r5d             | VKKERRQSSFPFNLN  |
| S | 1        | 81   | 0.034166 | 0.385832 | 1.556349 | 0.54407  | Q91V89   | Ppp2r5d             | KKERRQSSFPFNLNK  |
| S | 1        | 479  | 0.035138 | 0.562794 | -1.77935 | 0.462843 | P48453   | Serine/thr Ppp3cb   | SPPHRICSFEEAKGL  |
| S | 0.966381 | 670  | 0.007237 | 0.725746 | -0.89797 | -0.11288 | Q8R3Q2   | Serine/thr Ppp6r2   | PGLAAPSSTQKEGP   |
| S | 1        | 209  | 0.048235 | 0.840503 | -1.6333  | -0.24114 | Q9EQC8   | Prcc                | HAFSRKPSDISSDAK  |
| S | 1        | 108  | 0.228354 | 0.046803 | -1.48827 | -2.33883 | Q9R078   | 5'-AMP-ac Prkab1    | SKLPLTRSQNNFVAI  |
| T | 0.999737 | 198  | 0.024854 | 0.510214 | -2.31967 | 0.602665 | P68181   | cAMP-dep Prkaca;Prk | RVKGRTWTLCTGTPY  |
| S | 1        | 112  | 0.0094   | 0.728333 | -0.7943  | -0.10559 | P31324   | cAMP-dep Prkar2b    | NRFRRASVCAEAYN   |
| S | 0.999996 | 319  | 0.02553  | 0.647335 | -1.27732 | 0.259918 | Q4VA93   | Protein kir Prkca   | PAGNKVISPEDRQK   |
| S | 0.99983  | 11   | 0.003477 | 0.664761 | -1.08006 | 0.131144 | P68404-2 | Protein kir Prkcb   | PAAGPPPSEGEESTV  |
| S | 0.999251 | 206  | 0.008143 | 0.942397 | -3.15989 | 0.168904 | P68404-2 | Protein kir Prkcb   | KLIPDPKSESQKQTK  |
| T | 0.99992  | 642  | 0.020523 | 0.960612 | -3.44825 | 0.189931 | P68404   | Protein kir Prkcb   | TRQPVELTPTDKLFI  |
| T | 1        | 641  | 0.005716 | 0.996537 | -1.30658 | -0.01541 | P68404-2 | Protein kir Prkcb   | TRHPVLTPTDQVEVI  |
| S | 1        | 660  | 0.000274 | 0.076102 | -5.83658 | -1.36283 | P68404-2 | Protein kir Prkcb   | QSEFEGFSFVNSEFL  |
| S | 0.999996 | 643  | 0.011131 | 0.436132 | -1.17929 | -0.28373 | P28867   | Protein kir Prkcd   | LNEKPQLSFSKDNLI  |
| S | 1        | 729  | 0.002311 | 0.759777 | -1.22153 | -0.10894 | P16054   | Protein kir Prkce   | QEEFKGFSYFGEDLM  |
| T | 1        | 655  | 0.0102   | 0.300503 | -1.3862  | 0.412705 | P63318   | Protein kir Prkcg   | TRAAPALTPPDRVLV  |
| S | 0.999886 | 18   | 0.005956 | 0.478386 | -1.28377 | -0.24794 | Q9WTX2   | Interferon Prkra    | PPLQREDSGTFSGLGK |
| S | 1        | 619  | 0.008241 | 0.203597 | -1.64072 | -0.56125 | Q922U1   | U4/U6 sm Prpf3      | KGDDDEESDEEAVKK  |

|   |          |      |          |          |          |          |          |                          |                  |
|---|----------|------|----------|----------|----------|----------|----------|--------------------------|------------------|
| S | 1        | 88   | 0.01675  | 0.966353 | -2.17566 | 0.104914 | Q61136   | Serine/thr Prpf4b        | RKEVIEASDKEGLSP  |
| S | 1        | 363  | 0.047453 | 0.97908  | -1.47907 | -0.07404 | Q7TSC1   | Protein PR Prcc2a        | EGHKDSQSAAAEEPE  |
| S | 0.999421 | 378  | 0.027035 | 0.999979 | -0.79863 | 0.001077 | Q7TSC1   | Protein PR Prcc2a        | TDGKKGTSPGSELPP  |
| S | 1        | 799  | 0.054614 | 0.031017 | 0.734146 | 0.771054 | Q6PE13   | Proline-ric Prrt3        | ELDLRPPSPINLSRS  |
| S | 0.99766  | 44   | 0.001991 | 0.024128 | -1.52401 | -0.75563 | E9PUC5   | Psd3                     | KSMKISNSSEFSAKE  |
| S | 1        | 342  | 0.023778 | 0.426758 | -4.33341 | -1.28232 | E9PUC5   | PH and SE(Psd3           | KKSHSSPSLNPDASP  |
| T | 0.999921 | 273  | 0.010456 | 0.221055 | -1.02878 | 0.359044 | Q3TXS7   | 26S protea Psm�1         | QNLRTVGTPIASVPG  |
| T | 0.999623 | 20   | 0.03319  | 0.876049 | -1.1338  | 0.130621 | Q8VDM4   | 26S protea Psm�2         | SQQPSATTPSGADEK  |
| T | 1        | 250  | 0.015804 | 0.045902 | 2.786818 | 1.873956 | O35226   | 26S protea Psm�4         | AAEAGIATPGTEDSD  |
| T | 1        | 253  | 0.022231 | 0.086079 | 2.309687 | 1.396825 | O35226   | 26S protea Psm�4         | AGIATPGTEDSDDAL  |
| S | 1        | 153  | 0.011503 | 0.349893 | -1.80182 | 0.506087 | Q8BHL8   | Proteasom Psmf1          | WEKARANSPPREFPP  |
| S | 1        | 576  | 0.001253 | 0.001965 | -4.24481 | -3.44238 | B9EKR1   | Receptor-t Ptprz1        | KEVSADVSEENFLT   |
| S | 1        | 572  | 0.094728 | 0.027716 | -1.60709 | -2.07078 | B9EKR1   | Receptor-t Ptprz1        | ITEYKEVSADVSEEE  |
| S | 1        | 576  | 0.127375 | 0.014416 | -1.52113 | -2.57378 | B9EKR1   | Receptor-t Ptprz1        | KEVSADVSEENFLT   |
| S | 1        | 342  | 0.020647 | 0.428167 | -1.24439 | -0.35411 | Q8R4E6   | Purine-ric Purg          | RMDGRRASGEEQECL  |
| S | 0.999997 | 159  | 0.025519 | 0.327374 | 1.749693 | 0.62545  | Q8R4E6   | Purine-ric Purg          | RQKHSAPSPVSVGS   |
| S | 1        | 163  | 0.025519 | 0.327374 | 1.749693 | 0.62545  | Q8R4E6   | Purine-ric Purg          | SAPSPVSVGSEEHPP  |
| S | 1        | 166  | 0.025519 | 0.327374 | 1.749693 | 0.62545  | Q8R4E6   | Purine-ric Purg          | SPPVSVGSEEHPHSV  |
| T | 1        | 301  | 0.031988 | 0.562348 | -1.31024 | 0.332405 | Q80V76   | Pygo2                    | SSRGGGTDPANSLA   |
| S | 0.997145 | 1007 | 0.019722 | 0.999887 | -1.09353 | -0.00314 | E9Q9Q2   | R3hdm1                   | RQAKKAASTDLGAGE  |
| S | 1        | 278  | 0.038887 | 0.511704 | -1.23241 | -0.36071 | Q9DCB4   | R3H doma R3hdm1;R        | QDGRRSKSIIEEREE  |
| S | 0.999972 | 381  | 0.027371 | 0.904166 | -1.19502 | -0.11346 | Q80TM6   | R3H doma R3hdm2          | PPVTKASSFSGISIL  |
| S | 0.999738 | 923  | 0.025084 | 0.439805 | -0.95523 | -0.28043 | Q80TM6   | R3H doma R3hdm2          | RQALKSASTDLGTAD  |
| S | 1        | 530  | 0.00121  | 0.218028 | -1.28067 | 0.276025 | Q8R361   | Rab11 fam Rab11fip5      | TAAPVEASPRDKQPR  |
| S | 1        | 410  | 0.00273  | 0.155048 | -1.17515 | -0.34952 | O35551   | Rab GTPas Rabep1         | RRAQSTDSLGTSSSL  |
| S | 1        | 594  | 0.002742 | 0.991935 | -2.47027 | -0.03771 | Q5U3K5   | Rab-like pr Rabl6        | FPVREDLSVDTDEDT  |
| S | 1        | 483  | 0.000632 | 0.304585 | -2.99948 | -0.47629 | Q5U3K5   | Rab-like pr Rabl6        | SKNLSLSEEEAEGGL  |
| S | 1        | 594  | 0.047982 | 0.978136 | 0.846486 | 0.043474 | Q5U3K5   | Rab-like pr Rabl6        | FPVREDLSVDTDEDT  |
| T | 1        | 597  | 0.047982 | 0.978136 | 0.846486 | 0.043474 | Q5U3K5   | Rab-like pr Rabl6        | REDLSVDTDEDTGPA  |
| S | 0.999999 | 160  | 7.19E-05 | 0.341226 | -3.83108 | 0.362868 | P54728   | UV excisioi Rad23b       | AQTPVLTPAPADST   |
| S | 1        | 270  | 0.037562 | 0.352474 | -1.0049  | 0.381884 | Q64012   | RNA-bindii Raly          | APQEDTASEAGTPQG  |
| T | 1        | 274  | 0.004023 | 0.292698 | -1.30032 | 0.316068 | Q64012   | RNA-bindii Raly          | DTASEAGTPQGEVQT  |
| S | 0.999997 | 788  | 0.031522 | 0.096129 | -0.72108 | 0.461213 | Q9ERU9   | E3 SUMO- $\gamma$ Ranbp2 | SPTKYSLSPSKSYKY  |
| S | 1        | 148  | 0.002259 | 0.632616 | -2.47129 | -0.2907  | Q9CT10   | Ran-bindin Ranbp3        | NLTQRSPESAETH    |
| S | 0.995153 | 708  | 0.02307  | 0.070491 | 4.853861 | 3.160461 | Q5SVL6   | Rap1 GTPa Rap1gap2       | DKLSHASSSAGH___  |
| S | 0.997132 | 597  | 0.013077 | 0.703192 | -4.4736  | -0.68256 | E9Q912   | Rap1gds1                 | KSVAQQASLTEQRLT  |
| S | 1        | 192  | 0.027515 | 0.375265 | -3.02591 | 1.015614 | G5E867   | Raph1                    | NQHRRTASAGETVSDA |
| S | 1        | 218  | 0.000918 | 0.999961 | -2.00927 | -0.00168 | P42208   | Septin-2 Sept2           | YHLPPDAESDEDVFK  |
| S | 1        | 118  | 0.044103 | 0.936376 | -1.84395 | 0.160481 | P28661   | Septin-4 Sept4           | KLDPYDSSEDDKEYV  |
| S | 1        | 225  | 0.019377 | 0.039041 | -2.02281 | -1.49989 | Q9Z2Q6   | Septin-5 Sept5           | YQFPECDSDEDEDK   |
| T | 1        | 13   | 0.00014  | 0.692885 | -4.77062 | 0.274783 | Q9Z2Q6   | Septin-5 Sept5           | RYKSKLATPEDKQDI  |
| T | 0.999659 | 336  | 0.005266 | 0.432629 | -1.49558 | 0.303337 | Q9Z2Q6   | Septin-5 Sept5           | IPILPLPTDAETEK   |
| T | 0.984848 | 418  | 0.001012 | 0.931967 | -5.01443 | 0.183464 | Q9R1T4   | Septin-6 Sept6           | SQAGGSQTLKRDKK   |
| S | 0.980126 | 422  | 5.71E-06 | 0.374366 | -5.63662 | 0.301485 | O55131   | Septin-7 Sept7           | RILEQQNSSRTLEKN  |
| T | 1        | 227  | 0.02204  | 0.489451 | -2.65258 | 0.692021 | O55131   | Septin-7 Sept7           | KIVEFPETDDEEENK  |
| S | 0.99716  | 788  | 0.000265 | 0.000977 | -2.82402 | -1.91822 | E9PW37   | Rasal2                   | SSPNVSGSLSSGLQR  |
| S | 1        | 14   | 0.032391 | 0.68196  | 0.937816 | 0.189449 | Q9CW46   | Ribonuclec Raver1        | VTHRPLSPEAEAEA   |
| S | 1        | 1145 | 0.002977 | 0.974844 | -1.6687  | 0.046148 | P97868-2 | E3 ubiquiti Rbbp6        | GTEIVKPSPKRKMEG  |
| S | 1        | 723  | 0.02796  | 0.97847  | -2.19283 | 0.096131 | Q99KG3   | RNA-bindii Rbm10         | LASDDRPSPPRGLVA  |
| S | 1        | 293  | 0.023282 | 0.571111 | -1.42626 | 0.327211 | Q0VBL3   | Rbm15                    | GGGQRSLSPPGGAALG |
| S | 1        | 698  | 0.006175 | 0.037911 | -2.20979 | 1.251175 | B2RY56   | RNA-bindii Rbm25         | NKFEDESDDVPRKR   |
| S | 1        | 578  | 0.042191 | 0.801419 | -1.52951 | -0.24702 | B2RY56   | RNA-bindii Rbm25         | QIKQEPSEEEEEEK   |
| S | 1        | 42   | 8.11E-05 | 0.020403 | -2.36495 | -0.6241  | A0A023T6 | RNA-bindii RBM8          | RKGRFGFSEEGSRAR  |
| S | 0.99999  | 56   | 0.040779 | 0.443014 | -1.01912 | -0.33979 | A0A023T6 | RNA-bindii RBM8;Rbn      | RMREDYDSVEQDGDDE |
| S | 1        | 205  | 0.000831 | 0.363912 | -1.35235 | 0.205091 | Q91VM5   | RNA bindir Rbmxl1;Rb     | SRRDVYLSRDDGYS   |
| S | 1        | 108  | 0.629264 | 0.038362 | 1.011693 | 3.43585  | Q9JHG6   | Calcipressi Rcan1;Rca    | PTKQFLISPPASPPV  |
| S | 0.999968 | 120  | 0.515912 | 0.000413 | -0.20777 | -1.64524 | Q3UZA1   | CapZ-inter Rcsd1         | AIVSPFHSPSTPSS   |
| S | 0.995172 | 123  | 0.515912 | 0.000413 | -0.20777 | -1.64524 | Q3UZA1   | CapZ-inter Rcsd1         | SPFHSPSTPSSPGI   |
| T | 0.995552 | 124  | 0.515912 | 0.000413 | -0.20777 | -1.64524 | Q3UZA1   | CapZ-inter Rcsd1         | PFHSPSTPSSPGIR   |

|   |          |      |          |          |          |          |          |                        |                  |
|---|----------|------|----------|----------|----------|----------|----------|------------------------|------------------|
| S | 0.954145 | 537  | 0.026519 | 0.212798 | -6.2531  | -2.80884 | A2AFI8   | RalBP1-ass Reps2       | PSQAAESSPTKMDAP  |
| S | 1        | 68   | 0.046062 | 0.325869 | 1.009033 | -0.42567 | P35601   | Replicator Rfc1        | KKRIYDSDSESEET   |
| S | 0.99942  | 241  | 0.001902 | 0.013861 | -2.20818 | -1.2483  | O54829   | Regulator Rgs7         | QNDIRSHSPTHTPTP  |
| T | 0.999721 | 247  | 0.915575 | 0.000362 | -0.1776  | -4.30392 | O54829   | Regulator Rgs7         | HSPHTHTPTPETKPPT |
| S | 0.999427 | 38   | 0.000134 | 0.9787   | -4.90032 | 0.064311 | Q8BQP9   | Regulator Rgs7bp       | GDWERRGSGSESAAHK |
| S | 1        | 346  | 0.04558  | 0.956389 | -2.06377 | 0.148841 | Q99NE5   | Regulating Rims1       | RRLEKGRSQDYDPDL  |
| S | 0.999993 | 563  | 0.011092 | 0.205055 | 0.986318 | 0.361182 | Q99NE5   | Regulating Rims1       | RPSISVISPTSPGAL  |
| S | 0.999978 | 566  | 0.011092 | 0.205055 | 0.986318 | 0.361182 | Q99NE5   | Regulating Rims1       | ISVISPTSPGALKDA  |
| S | 0.98015  | 719  | 0.013965 | 0.07922  | 1.078376 | 0.595503 | Q3V3V9-2 | Leucine-ric Rltpr      | PYPTEPSSPERSPPS  |
| S | 0.999999 | 723  | 0.013965 | 0.07922  | 1.078376 | 0.595503 | Q3V3V9-2 | Leucine-ric Rltpr      | EPSSPERSPPSPATD  |
| S | 0.999995 | 726  | 0.013965 | 0.07922  | 1.078376 | 0.595503 | Q3V3V9-2 | Leucine-ric Rltpr      | SPERSPPSPATDQRG  |
| T | 1        | 13   | 0.494322 | 0.045219 | -1.80804 | -4.59519 | Q8BFU3   | RING finge Rnf214      | VAGLGAGTPSPSESS  |
| S | 0.992426 | 64   | 0.003441 | 0.01754  | -2.59688 | -1.57859 | Q9D0L8   | mRNA cap Rnmt          | NSSVYQDQSPSKKRKL |
| S | 0.866098 | 1403 | 0.00358  | 0.318313 | -1.93996 | 0.438524 | G5E843   | Roundabout Robo1       | SQCPRPTSPVSTDSN  |
| S | 1        | 118  | 0.00551  | 0.204819 | -4.23587 | -1.31537 | Q9D7S7   | 60S riboso Rpl22l1     | ISQDEDGSESED___  |
| S | 0.999955 | 863  | 0.785796 | 0.027719 | 0.514478 | 1.698791 | Q8K4Q0   | Regulatory Rptor       | LTQSAPASPTNKGMMH |
| S | 1        | 1347 | 0.001753 | 0.999795 | -1.82497 | -0.00402 | E9Q4Y2   | Rsf1                   | KKPYRIESDEEEDFE  |
| S | 0.999999 | 6    | 0.009794 | 0.52     | -2.20605 | -0.4461  | Q9DBU6   | Serine/Arg Rsrc1       | __MGRRSSDTEEESR  |
| S | 0.999036 | 16   | 0.011499 | 0.397271 | -1.03271 | 0.267435 | Q8K0T0   | Reticulon- Rtn1        | DEPLSLGSPGSPWFG  |
| T | 0.998251 | 332  | 0.003487 | 0.601774 | -1.50392 | 0.206685 | Q8K0T0   | Reticulon- Rtn1        | DDSPGVSPTPSSWGTE |
| S | 0.999651 | 217  | 0.003251 | 0.919439 | -2.66952 | 0.137975 | Q9E597   | Reticulon- Rtn3        | HICTYLSVPELVA    |
| S | 0.999998 | 953  | 0.048675 | 0.626222 | -0.93361 | -0.2368  | Q99P72   | Reticulon- Rtn4        | EAEKLPDTEKEDR    |
| S | 1        | 145  | 0.031671 | 0.246467 | -1.13766 | 0.500545 | Q99P72   | Reticulon- Rtn4        | PPAPAGASPLAEPAA  |
| S | 0.999986 | 836  | 0.033199 | 0.041668 | 4.567194 | 3.834091 | Q99P72   | Reticulon- Rtn4        | MKESETFSDSSPIEI  |
| S | 0.958274 | 838  | 0.028477 | 0.104294 | 5.224    | 3.161387 | Q99P72   | Reticulon- Rtn4        | ESETFSDSSPIEIID  |
| T | 0.938899 | 834  | 0.024075 | 0.029927 | 4.781054 | 4.035474 | Q99P72   | Reticulon- Rtn4        | DKMKESETFSDSSPI  |
| T | 1        | 1864 | 0.008153 | 0.877155 | -1.99263 | 0.160131 | E9Q401   | Ryanodine Ryr2         | VP EEGGTPEKEISI  |
| S | 0.99945  | 2807 | 0.037637 | 0.010265 | -2.34526 | -2.93224 | E9Q401   | Ryanodine Ryr2         | YNRTRRISQTSQVSI  |
| S | 0.999975 | 2813 | 0.098126 | 0.018031 | -2.34526 | -3.42067 | E9Q401   | Ryanodine Ryr2         | ISQTSQVSDAAHGY   |
| S | 1        | 366  | 0.034982 | 0.990516 | -1.49851 | 0.046108 | D3YXK2   | Scaffold at Safb;Safb2 | RAPTAALSPEPQDSK  |
| S | 0.999999 | 241  | 0.008523 | 0.00019  | -0.47511 | -0.97383 | F8VQK5   | SAM and S Sash1        | TCNSREQSDDETEDS  |
| S | 1        | 831  | 0.033731 | 0.152193 | -1.0621  | -0.58578 | F8VQK5   | SAM and S Sash1        | ESWPRSHSLDDLQGD  |
| S | 0.999602 | 694  | 0.007976 | 0.018872 | -2.69057 | -1.94838 | F8VQK5   | SAM and S Sash1        | LQEYDSNSDQSGSQE  |
| S | 1        | 20   | 0.031002 | 0.962559 | -0.95422 | -0.0571  | Q6ZPE2   | Myotubule Sbf1         | FGPHPRGSGEGGQGI  |
| S | 1        | 493  | 0.046057 | 0.972132 | -1.73893 | -0.09989 | Q5U4C3   | Splicing fac Scaf1     | RYRQRASASGPPPAR  |
| S | 1        | 691  | 0.111717 | 0.048642 | -1.73917 | -2.02791 | Q5U4C3   | Splicing fac Scaf1     | KREYVLDSEGLSADE  |
| S | 1        | 695  | 0.108869 | 0.044433 | -1.73917 | -2.06289 | Q5U4C3   | Splicing fac Scaf1     | LVDSEGLSPARGGK   |
| S | 1        | 617  | 0.003353 | 0.830245 | -1.11471 | -0.0877  | Q6DID3   | Protein SC.Scaf8       | EPVQTAQSPAPVEKE  |
| S | 1        | 270  | 0.007796 | 0.180769 | -3.3469  | -1.18913 | Q03517   | Secretogran Scg2       | TQEEVRDSKENTENK  |
| S | 0.999983 | 532  | 0.032757 | 0.99922  | -1.1363  | -0.00981 | Q03517   | Secretogran Scg2       | KRVSPVSSDDLQEQ   |
| S | 1        | 205  | 0.001561 | 0.166431 | -1.02724 | -0.26264 | P12961   | Neuroendocr Scg5       | KKSVPHFSEEEKEAE  |
| S | 0.999998 | 1939 | 0.00043  | 0.999869 | -2.84606 | 0.003708 | A2APX8   | Sodium ch Scn1a        | KRTVKQASFTYNKNK  |
| S | 1        | 715  | 0.411233 | 0.033974 | 0.892071 | 2.134631 | A2APX8   | Sodium ch Scn1a        | SQRQRAMSIASILT   |
| S | 1        | 718  | 0.701167 | 0.034431 | 0.525761 | 2.134631 | A2APX8   | Sodium ch Scn1a        | QRAMSIASILTNTVE  |
| S | 1        | 558  | 0.044705 | 0.865837 | 1.837635 | 0.240574 | B1AWN6   | Sodium ch Scn2a1       | RFSSPHQSLLSIRGS  |
| S | 0.864026 | 288  | 0.034088 | 0.530214 | 1.54011  | 0.420818 | Q63918   | Serum dep Sdpr         | KASSGKSSPFKV SPL |
| S | 1        | 7    | 0.012085 | 0.319587 | -1.70973 | 0.512563 | Q80ZX0   | Sec24b                 | _MSAPAGSPHPAAGA  |
| S | 1        | 782  | 0.006786 | 0.89671  | -2.50503 | 0.175242 | O09126   | Semaphorin Sema4d      | KTPKSDFSDLQSVK   |
| T | 1        | 223  | 0.00845  | 0.680908 | -0.98467 | 0.141891 | Q99NB9   | Splicing fac Sf3b1     | SSWDQAETPGHTPSL  |
| T | 1        | 227  | 0.00845  | 0.680908 | -0.98467 | 0.141891 | Q99NB9   | Splicing fac Sf3b1     | QAETPGHTPSLRWDE  |
| S | 0.99931  | 398  | 0.026759 | 0.77273  | -0.71463 | -0.11049 | Q8VD37-8 | SH3-contai Sgip1       | DYLETLSSPKCEGLG  |
| S | 1        | 300  | 0.042329 | 0.178406 | -1.77522 | -0.97857 | Q8VD37-8 | SH3-contai Sgip1       | SIFGPVLSPKSVAVN  |
| S | 0.998038 | 265  | 0.000052 | 0.823418 | -5.75355 | -0.19192 | Q8VD37-8 | SH3-contai Sgip1       | ATPPRTGSPLVATG   |
| S | 1        | 78   | 0.003443 | 0.612355 | -1.99423 | -0.26789 | Q8VD37-8 | SH3-contai Sgip1       | IDWERYNSPELDEEG  |
| T | 1        | 180  | 0.060145 | 0.030657 | -2.96293 | -3.2137  | Q8VD37-8 | SH3-contai Sgip1       | VARRRSTPTPELTS   |
| S | 1        | 484  | 0.007801 | 0.635407 | 1.132332 | 0.175652 | Q8VD37-8 | SH3-contai Sgip1       | GDVSRPFSPPIHSSS  |
| S | 0.999995 | 306  | 0.983255 | 0.000102 | 0.061043 | -4.44274 | Q8BJU0-2 | Small glut Sgta        | VVRSRTPSASHEEQQ  |
| S | 0.999995 | 306  | 0.003906 | 0.439873 | -1.70267 | -0.31867 | Q8BJU0-2 | Small glut Sgta        | VVRSRTPSASHEEQQ  |
| S | 0.999995 | 306  | 0.000698 | 0.788296 | -3.04925 | 0.194244 | Q8BJU0-2 | Small glut Sgta        | VVRSRTPSASHEEQQ  |
| S | 0.993792 | 219  | 0.010941 | 0.788635 | -1.63065 | -0.19233 | Q91ZM2-6 | SH2B adap Sh2b1        | ALANDGTSPGERWTH  |

|   |          |      |          |          |          |          |          |             |            |                  |
|---|----------|------|----------|----------|----------|----------|----------|-------------|------------|------------------|
| S | 0.987967 | 103  | 0.000487 | 0.816498 | -5.67967 | -0.30789 | Q8BG73   | SH3 domai   | Sh3bgrl2   | GLKPRPASTAEP___  |
| S | 1        | 377  | 0.039069 | 0.288574 | -2.68011 | -1.15372 | Q99LH9   | SH3 domai   | Sh3bp5l    | QSRGRRGSDIGVRRG  |
| S | 1        | 342  | 0.00441  | 0.877082 | -2.3997  | 0.167262 | Q99LH9   | SH3 domai   | Sh3bp5l    | LSLRTVASDLQKDCS  |
| S | 1        | 413  | 0.028994 | 0.880758 | -0.74062 | -0.0805  | D3YZU5   |             | Shank1     | DVVPFQESPKYAARR  |
| S | 1        | 1377 | 0.023527 | 0.060246 | -2.00401 | 1.376751 | D3YZU5   |             | Shank1     | QPPRRPPSPRYDAPP  |
| S | 1        | 1013 | 0.021091 | 0.128782 | -1.23572 | -0.64079 | D3Z5K8   | SH3 and m   | Shank2     | KQSNVEDSPEKTCSE  |
| S | 1        | 354  | 0.033448 | 0.496204 | -1.4398  | 0.415048 | Q61120   | SHC-transf  | Shc3       | PMLSKAASVEICISPV |
| T | 0.849693 | 3    | 0.041766 | 0.294919 | -2.4111  | -1.04547 | A2ALU4-2 | Protein Sh  | Shroom2    | ____METSRSPPSQ   |
| S | 1        | 493  | 0.03483  | 0.009707 | -2.2975  | -2.84941 | Q6P4S6   | Serine/thr  | Sik3       | GPLGRRASDGGGANIQ |
| T | 1        | 411  | 0.010371 | 0.988454 | -2.20737 | 0.054895 | Q6P4S6   | Serine/thr  | Sik3       | YLSMRRHTVGVADPR  |
| S | 1        | 533  | 0.028684 | 0.974624 | 0.799919 | 0.038394 | Q6P4S6   | Serine/thr  | Sik3       | VTPVDEESSDGEPPDQ |
| S | 1        | 534  | 0.028684 | 0.974624 | 0.799919 | 0.038394 | Q6P4S6   | Serine/thr  | Sik3       | TPVDEESSDGEPPDQE |
| S | 1        | 1564 | 4.65E-06 | 0.199459 | -4.59172 | 0.327281 | Q8COT5   | Signal-ind  | Sipa1l1    | RALHRTLSDESIYSS  |
| S | 0.999125 | 1544 | 0.004421 | 0.641551 | 0.898531 | -0.12072 | Q8COT5   | Signal-ind  | Sipa1l1    | FKFHALSSPQSPFPT  |
| S | 1        | 1547 | 0.004421 | 0.641551 | 0.898531 | -0.12072 | Q8COT5   | Signal-ind  | Sipa1l1    | HALSSPQSPFPTTPT  |
| S | 0.999995 | 1538 | 0.005575 | 0.551334 | -1.63186 | 0.273553 | G3X9J0   |             | Sipa1l3    | KSLQRTLSDSELCSG  |
| S | 1        | 368  | 0.006855 | 0.020911 | -1.37054 | -0.93281 | Q8VDQ8   | NAD-depe    | Sirt2      | PNPSTTISPQKSPPP  |
| S | 0.998212 | 1905 | 0.00383  | 0.999057 | -2.60222 | 0.014601 | A2AQ25   | Sickle tail | ƒ Skt;Etl4 | SSPPSPASPTSLNQG  |
| S | 0.999932 | 960  | 0.004637 | 0.005663 | -4.84626 | -4.14012 | Q91V14   | Solute carr | Slc12a5    | IQSITDESRTSIRRK  |
| S | 1        | 491  | 0.049801 | 0.992486 | -1.27279 | 0.038511 | P53986   | Monocarb    | Slc16a1    | GDPTEEESPV____   |
| S | 1        | 24   | 0.00117  | 0.893575 | -4.62323 | -0.22196 | P43006   | Excitatory  | Slc1a2     | RMHDSHLSDESPEKHR |
| S | 1        | 562  | 0.040899 | 0.431467 | -1.53956 | 0.523854 | P43006   | Excitatory  | Slc1a2     | NGKSADCSVEEPPWK  |
| S | 1        | 268  | 0.01793  | 0.632872 | -1.57926 | 0.301724 | Q80UP8   | Sodium-de   | Slc20a2    | RKVQEAESPGFKELP  |
| S | 0.993286 | 312  | 0.049012 | 0.62503  | -1.41866 | -0.36139 | Q8BUN9   |             | Slc24a2    | VPEAQAKSPTAGDKD  |
| S | 0.99523  | 149  | 0.037415 | 0.532861 | -1.62166 | -0.45259 | P48962   | ADP/ATP t   | Slc25a4    | AADVKGSSQREFNG   |
| S | 1        | 634  | 0.039874 | 0.434738 | -1.1483  | -0.3858  | Q3UHK1   | Proton my   | Slc2a13    | HLSNDNDASDVE____ |
| S | 1        | 52   | 0.034702 | 0.168519 | -1.18557 | -0.63279 | Q8K2P7   | Sodium-co   | Slc38a1    | SDRESRRSLTNSHLE  |
| S | 1        | 258  | 0.013232 | 0.930727 | -1.57019 | -0.10401 | E9Q585   |             | Slc4a1ap   | KKMLGEDSDDEEEAN  |
| S | 1        | 198  | 9.64E-05 | 0.524161 | -0.9998  | 0.073625 | P16283   | Anion excl  | Slc4a3     | VGLQSDQSPQSRGSS  |
| S | 1        | 22   | 0.000179 | 0.000013 | -2.15367 | -3.29422 | Q6PGE7   | Sodium-de   | Slc6a7     | PDLLMTPSDQGDVDL  |
| T | 1        | 20   | 0.000179 | 0.000013 | -2.15367 | -3.29422 | Q6PGE7   | Sodium-de   | Slc6a7     | ITPDLLMTPSDQGDV  |
| S | 1        | 600  | 0.018842 | 0.99765  | -3.33427 | 0.043214 | P28571-1 | Sodium- ar  | Slc6a9     | YAPTTTTSPEDGFEV  |
| T | 0.806717 | 597  | 0.001994 | 0.987813 | -2.46646 | 0.043214 | P28571-1 | Sodium- ar  | Slc6a9     | TGRYAPTTTTSPEDG  |
| T | 0.997075 | 598  | 0.022542 | 0.996823 | -2.73708 | 0.043214 | P28571-1 | Sodium- ar  | Slc6a9     | GRYAPTTTTSPEDGF  |
| S | 1        | 527  | 0.777679 | 0.003841 | -0.09474 | -0.79582 | Q9QXW9   | Large neut  | Slc7a8     | TPVKDPDSEEQ____  |
| S | 1        | 21   | 0.021044 | 0.853318 | -1.9944  | -0.22374 | Q9QXW9   | Large neut  | Slc7a8     | NHPGSDTSPAEASS   |
| S | 1        | 282  | 0.596325 | 0.014487 | -0.65487 | -2.69878 | Q68FLO   | Sodium/ca   | Slc8a1     | HEGDRPCLTIEMD    |
| S | 1        | 801  | 0.117373 | 0.027126 | -0.87762 | 1.225322 | Q61165   | Sodium/hy   | Slc9a1     | QRIQRCLSDPGPHPE  |
| S | 1        | 697  | 0.042549 | 0.892779 | -3.21422 | 0.366387 | Q61165   | Sodium/hy   | Slc9a1     | VPAHKLDSPTLSRAR  |
| S | 0.999151 | 647  | 0.001317 | 0.048554 | -3.12007 | -1.16555 | O54988   | STE20-like  | Slk        | EQVSESNIEELERL   |
| S | 1        | 289  | 0.013027 | 0.899374 | -1.03326 | 0.083315 | Q8CH25   | SAFB-like   | t Sltm     | VQDAIAQSPEKEAKD  |
| S | 1        | 283  | 0.005081 | 0.229456 | -1.3496  | -0.39068 | Q3UID0   | SWI/SNF c   | Smarrcc2   | TLTDEVNSPDSRRRD  |
| S | 0.999944 | 488  | 0.04713  | 0.495197 | 1.123284 | 0.357297 | Q3UMB5   | Smith-Ma    | Mag Smcr8  | SVLSKSDQASLTVP   |
| S | 1        | 200  | 0.390325 | 0.013478 | -0.79265 | -2.32752 | Q80U23   | Syntaphilir | Snph       | KEEGTGESAGGSPAR  |
| S | 0.999734 | 208  | 0.022942 | 0.995409 | -4.24785 | -0.08104 | Q80U23   | Syntaphilir | Snph       | AGGSPARSLTRSSTY  |
| S | 1        | 226  | 0.023155 | 0.297041 | -2.42815 | -0.89329 | Q62376   | U1 small n  | Snrnp70    | YDERPGPSPLPHRDR  |
| S | 1        | 194  | 0.089062 | 0.03047  | 1.963674 | -2.41615 | Q61234   | Alpha-1-sy  | Snta1      | SPLQRQPSSPGPQPR  |
| S | 1        | 195  | 0.018726 | 0.822601 | 2.750666 | -0.33413 | Q61234   | Alpha-1-sy  | Snta1      | PLQRQPSSPGPQPRN  |
| S | 1        | 75   | 0.000686 | 0.038623 | -1.23804 | 0.429419 | Q61235   | Beta-2-syn  | Sntb2      | NRGLGPPSPAPPARG  |
| S | 0.998536 | 29   | 0.013144 | 0.973665 | -1.63752 | -0.06556 | Q8C080   | Sorting ne: | Snx16      | NRNQRSSSFGSVSTS  |
| S | 1        | 49   | 0.015699 | 0.74591  | -1.46143 | -0.21107 | Q3UHD6   | Sorting ne: | Snx27      | VRIVKSESGYGFNVR  |
| S | 0.99332  | 639  | 0.035127 | 0.94491  | -2.01506 | 0.152501 | Q6NZL0   | Protein SO  | Soga3      | LMREQSELSLRQH    |
| S | 1        | 1723 | 0.020849 | 0.80299  | -1.37774 | -0.18302 | Q9QX47   | Protein SO  | Son        | QAVAVALSPEKESSED |
| S | 1        | 62   | 0.046343 | 0.034498 | -0.77446 | -0.75288 | Q62417   | Sorbin and  | Sorbs1     | SPVSPQESPKHESKS  |
| S | 0.999999 | 58   | 0.029204 | 0.484613 | 1.474004 | -0.4177  | Q62417   | Sorbin and  | Sorbs1     | TPSSSPVSPQESPKH  |
| S | 1        | 62   | 0.029204 | 0.484613 | 1.474004 | -0.4177  | Q62417   | Sorbin and  | Sorbs1     | SPVSPQESPKHESKS  |
| S | 0.96391  | 446  | 0.436154 | 0.006585 | -0.88386 | 3.329989 | D3Z080   | Sorbin and  | Sorbs2     | FISSSPSPSRAQDH   |
| S | 0.96391  | 497  | 0.432438 | 0.017763 | -1.05794 | 3.113258 | Q3UTJ2-2 | Sorbin and  | Sorbs2     | FISSSPSPSRAQGG   |
| S | 1        | 819  | 0.003108 | 0.987686 | -1.80729 | -0.03512 | Q6PHU5   | Sortilin    | Sort1      | KSGYHDDSDLEDLLE_ |
| S | 0.999992 | 716  | 0.030687 | 0.203081 | 1.35986  | -0.6486  | Q58A65-2 | C-Jun-amir  | Spag9      | GSKQRSASQSSLDKL  |



|   |          |      |          |          |          |          |          |                      |                  |
|---|----------|------|----------|----------|----------|----------|----------|----------------------|------------------|
| S | 0.996953 | 719  | 0.030687 | 0.203081 | 1.35986  | -0.6486  | Q58A65-2 | C-Jun-amir Spag9     | QRSASQSSLDKLDQE  |
| S | 0.999991 | 888  | 0.006509 | 0.919415 | -1.36297 | -0.08257 | Q2KN98   | Cytospin-A Specc11   | VSPMQRHSISGPIST  |
| S | 1        | 2042 | 0.014819 | 0.661523 | -0.96854 | 0.166578 | Q62407   | Striated m Spag      | RSLHKAASVELPQRR  |
| S | 1        | 749  | 0.008713 | 0.027336 | -3.25948 | -2.1882  | Q62504   | Msx2-inter Spen      | RPIERSQSPVHLRRP  |
| S | 1        | 1077 | 0.995532 | 0.001123 | -0.02283 | -1.95635 | Q62504   | Msx2-inter Spen      | ERLNSALSPKDCQDP  |
| S | 1        | 286  | 0.000932 | 0.215159 | -2.01371 | -0.41277 | Q6P6N5   | Sprouty-re Spred3    | TPAPAKASPEEEAAA  |
| S | 1        | 1029 | 0.009795 | 0.025122 | -4.17858 | -2.95026 | A3KGU7   | Spectrin al Sptan1   | KKLDPAQASARENLL  |
| S | 1        | 1031 | 0.001907 | 0.000445 | -3.2979  | -4.02977 | A3KGU7   | Spectrin al Sptan1   | LDPAQASARENLLLE  |
| S | 1        | 2296 | 0.152336 | 0.046096 | 0.541119 | -0.71906 | Q91ZE6   | Sptbn4               | RRIERQESSEQETPT  |
| S | 0.99812  | 74   | 0.000809 | 0.12784  | -1.83142 | -0.45003 | P05480   | Neuronal $\zeta$ Src | NSSDVTVSPQRAGPL  |
| S | 1        | 1077 | 0.019449 | 0.078973 | -1.93199 | -1.16087 | B1AQX9   | Srcin1               | VFIKKAESSELEVQK  |
| S | 0.999999 | 546  | 1.91E-05 | 0.985712 | -5.16337 | -0.03718 | B1AQX9   | Srcin1               | RQSFRRKDSGSSVFA  |
| S | 0.999936 | 900  | 0.041332 | 0.563367 | -2.30962 | -0.62808 | B1AQX9   | Srcin1               | DFEIPPPSPPLNLHE  |
| S | 1        | 1037 | 0.922617 | 0.002122 | -0.07874 | 1.369044 | B1AQX9   | Srcin1               | RTEKPSKSPPPPPPR  |
| S | 0.999775 | 319  | 0.003582 | 0.871856 | -2.6944  | 0.183363 | B1AQX9   | Srcin1               | RREMVYASRESSPTR  |
| S | 0.999726 | 323  | 0.005271 | 0.908743 | -2.97278 | 0.183363 | B1AQX9   | Srcin1               | VYASRESSPTRRLNN  |
| S | 1        | 868  | 0.006028 | 0.044011 | -3.93529 | -2.1241  | Q812A2   | SLIT-ROBO Srgap3     | AAIPRRRSGGDTHSP  |
| S | 1        | 309  | 0.04781  | 0.359076 | 1.100981 | 0.443087 | O70551   | SRSF prote Srpk1     | RPNKQEESESPVDRP  |
| S | 1        | 311  | 0.04781  | 0.359076 | 1.100981 | 0.443087 | O70551   | SRSF prote Srpk1     | NKQEESESPVDRPLT  |
| S | 1        | 260  | 0.000627 | 0.416484 | -2.27457 | 0.297178 | E9PUK6   | Serine/arg Srrm1     | VPEPKESPEKNSKK   |
| S | 1        | 429  | 0.011267 | 0.696834 | -1.77087 | -0.26421 | E9PUK6   | Serine/arg Srrm1     | RKSRVSVSPGRTSGK  |
| S | 1        | 635  | 0.004129 | 0.000784 | -2.76704 | -3.56251 | E9PUK6   | Serine/arg Srrm1     | PPKRRTASPPPPPKR  |
| T | 1        | 633  | 0.031756 | 0.017579 | -2.95186 | -3.08345 | E9PUK6   | Serine/arg Srrm1     | SPPPKRRTASPPPPP  |
| S | 1        | 723  | 0.042844 | 0.884201 | -3.58282 | 0.426908 | E9PUK6   | Serine/arg Srrm1     | PPVRRGASASPQGRQ  |
| S | 1        | 725  | 0.017692 | 0.669546 | -2.41363 | 0.426908 | E9PUK6   | Serine/arg Srrm1     | VRRGASASPQGRQSP  |
| S | 1        | 731  | 0.017395 | 0.597444 | -2.1049  | 0.426908 | E9PUK6   | Serine/arg Srrm1     | ASPQGRQSPSPSTRP  |
| S | 1        | 2648 | 0.005203 | 0.986352 | -1.90224 | 0.043764 | Q8BTI8   | Serine/arg Srrm2     | DSRSLSYSPVERRQP  |
| S | 1        | 2535 | 0.007132 | 0.606009 | -2.53567 | 0.407455 | Q8BTI8   | Serine/arg Srrm2     | VALKRVPSPTVPKKE  |
| S | 1        | 888  | 0.018894 | 0.176334 | -1.48014 | 0.66003  | Q8BTI8   | Serine/arg Srrm2     | QSPSRSSSPQPKVKT  |
| S | 0.999975 | 1360 | 0.014142 | 0.163902 | -1.09484 | 0.467635 | Q8BTI8   | Serine/arg Srrm2     | FSSQKVSSPVLETVQ  |
| T | 1        | 1448 | 0.002049 | 0.514816 | -2.53921 | 0.362244 | Q8BTI8   | Serine/arg Srrm2     | EPKALPQTTPRARSHS |
| S | 0.999985 | 2075 | 0.022348 | 0.535825 | -2.05771 | 0.497296 | Q8BTI8   | Serine/arg Srrm2     | CFSRPSMSPTPLDRK  |
| S | 0.999999 | 850  | 0.455786 | 0.00514  | -0.18072 | -0.74536 | Q8BTI8   | Serine/arg Srrm2     | QRQSHSESSPDGEVK  |
| S | 1        | 851  | 0.175335 | 0.033462 | -0.4844  | -0.74536 | Q8BTI8   | Serine/arg Srrm2     | RQSHSESSPDGEVKS  |
| S | 1        | 2052 | 0.000222 | 0.850251 | -3.27805 | 0.134072 | Q8BTI8   | Serine/arg Srrm2     | PPATRNHSGSRTPPV  |
| S | 1        | 2054 | 0.003856 | 0.968511 | -4.07748 | 0.134072 | Q8BTI8   | Serine/arg Srrm2     | ATRNHSGSRTPPVAL  |
| S | 1        | 1687 | 0.01816  | 0.374439 | -3.11225 | 0.938748 | Q8BTI8   | Serine/arg Srrm2     | RRRSVSGSSPPEKTEK |
| S | 1        | 777  | 0.03778  | 0.01957  | 1.456653 | 1.553234 | Q8BTI8   | Serine/arg Srrm2     | LRRSLSGSSPCPKQK  |
| S | 1        | 757  | 0.043946 | 0.636672 | -2.72261 | -0.65696 | Q8BTI8   | Serine/arg Srrm2     | SHVSSRRSRSLSSPR  |
| T | 1        | 2056 | 0.000831 | 0.923004 | -3.57882 | 0.134072 | Q8BTI8   | Serine/arg Srrm2     | RNHSGSRTPPVALSS  |
| S | 1        | 4    | 0.018932 | 0.982033 | -1.21922 | -0.04403 | Q99MR6   | Serrate RN Srrt      | ___MGDSDDEYDRR   |
| S | 1        | 67   | 0.047657 | 0.655901 | -0.88743 | -0.21096 | Q99MR6   | Serrate RN Srrt      | RNRRERFSPRHELS   |
| S | 1        | 74   | 0.047657 | 0.655901 | -0.88743 | -0.21096 | Q99MR6   | Serrate RN Srrt      | SPPRHLSPPQKRMR   |
| S | 1        | 477  | 0.007314 | 0.209679 | -2.13649 | -0.70134 | E9Q6E5   | Srsf11               | KRPTEAVSPKTKES   |
| S | 1        | 291  | 0.024459 | 0.854666 | -3.76689 | -0.4372  | Q8VE97   | Serine/arg Srsf4     | AGKAKSHSPSRHDSK  |
| S | 1        | 303  | 0.002963 | 0.106989 | -1.39529 | -0.48482 | Q3TWW8   | Serine/arg Srsf6     | RSQSRSHSPLPAPPS  |
| S | 1        | 260  | 0.040059 | 0.734123 | -1.17364 | 0.223583 | Q8BL97   | Serine/arg Srsf7     | PSGSPHRASAPERMD  |
| S | 1        | 262  | 0.040059 | 0.734123 | -1.17364 | 0.223583 | Q8BL97   | Serine/arg Srsf7     | GSPHRASAPERMD__  |
| S | 1        | 221  | 0.845579 | 0.004069 | -0.18897 | -1.94239 | Q8BL97   | Serine/arg Srsf7     | IGSRYFQSRSRSRSR  |
| S | 1        | 219  | 0.040059 | 0.734123 | -1.17364 | 0.223583 | Q8BL97-4 | Serine/arg Srsf7     | PSGSPHRASAPERMD  |
| S | 1        | 221  | 0.040059 | 0.734123 | -1.17364 | 0.223583 | Q8BL97-4 | Serine/arg Srsf7     | GSPHRASAPERMD__  |
| S | 1        | 320  | 0.026395 | 0.172938 | -0.75693 | 0.371211 | Q3U4B1   | Ssbp4                | MDGLPKNSPGAVGGL  |
| S | 1        | 16   | 0.023723 | 0.012153 | -1.95581 | -2.07168 | P54227   | Stathmin Stmn1       | KELEKRASGQAFELI  |
| S | 1        | 63   | 0.010708 | 0.770575 | -1.22712 | -0.15136 | P54227   | Stathmin Stmn1       | AAEERRKSQAEVLK   |
| S | 1        | 16   | 0.912631 | 0.006109 | 0.11575  | -1.48541 | P54227   | Stathmin Stmn1       | KELEKRASGQAFELI  |
| S | 1        | 25   | 0.912631 | 0.006109 | 0.11575  | -1.48541 | P54227   | Stathmin Stmn1       | QAFELILSPRSKESV  |
| S | 1        | 50   | 0.848074 | 0.043533 | -0.38523 | -2.21086 | P55821   | Stathmin-2 Stmn2     | KQINKRASGQAFELI  |
| S | 0.99962  | 62   | 0.848074 | 0.043533 | -0.38523 | -2.21086 | P55821   | Stathmin-2 Stmn2     | ELILKPPSPISEAPR  |
| S | 1        | 81   | 0.00261  | 0.927363 | -1.50598 | 0.070134 | O70166   | Stathmin-3 Stmn3     | PPKRKDasLEELQKR  |
| S | 1        | 223  | 0.005949 | 0.017291 | -1.55649 | -1.07602 | P58404   | Striatin-4 Strn4     | VEGAPRASPGGGLS   |

|   |          |      |          |          |          |          |          |                        |                  |
|---|----------|------|----------|----------|----------|----------|----------|------------------------|------------------|
| S | 0.999979 | 598  | 0.033898 | 0.391717 | -1.54039 | -0.53198 | Q5DQR4   | Syntaxin-b Stxbp5l     | GSTNTVSSEGVTKDS  |
| S | 0.992883 | 733  | 0.014563 | 0.089622 | -0.75356 | 0.403838 | Q8CH09   | SURP and Sugp2         | KPCQPSSPGALGPS   |
| T | 1        | 11   | 0.016501 | 0.377965 | -1.37812 | 0.403287 | P63046   | Sulfotransf Sult4a1    | SEAETPGTGFEFESK  |
| S | 1        | 642  | 0.005035 | 0.018993 | 1.269088 | 0.824282 | O88935-1 | Synapsin-1 Syn1        | PQLAQKPSQDVPPPI  |
| S | 0.999996 | 67   | 0.04978  | 0.357759 | 0.871215 | 0.355581 | O88935   | Synapsin-1 Syn1        | VASPAAPSPGSSGGG  |
| T | 0.961084 | 512  | 0.033574 | 0.200416 | 1.635583 | 0.804138 | O88935   | Synapsin-1 Syn1        | PQRLPSPTAAPQQSA  |
| S | 1        | 426  | 0.038732 | 0.696439 | -2.7037  | 0.556238 | Q64332   | Synapsin-2 Syn2        | LSRTPALSPQRPLTT  |
| S | 0.999997 | 540  | 0.018934 | 0.040473 | -1.43576 | -1.04763 | Q8JZP2   | Synapsin-3 Syn3        | PHLNKSQLTNSLST   |
| S | 1        | 8306 | 0.002238 | 0.243319 | -1.75654 | 0.411298 | Q6ZWR6-4 | Nesprin-1 Syne1        | SASRTLPEDEEGEE   |
| S | 1        | 1070 | 0.000569 | 0.047761 | -1.35634 | -0.42545 | F6SEU4   | Ras/Rap G Syngap1      | PPLQRGKSQQLTVSA  |
| S | 0.999997 | 87   | 0.024375 | 0.140055 | -0.84037 | 0.438554 | F6SEU4   | Ras/Rap G Syngap1      | KLLRRTVSVPEGRP   |
| S | 1        | 258  | 0.031477 | 0.966583 | -3.79362 | 0.214991 | E9Q3E2   | Synaptopo Synpo        | RHLEKVASEEEEEVPL |
| T | 1        | 128  | 0.010656 | 0.920589 | -3.14088 | 0.212223 | P46097   | Synaptotax Syt2        | DDAETGLTEGEGEGE  |
| S | 1        | 163  | 0.007268 | 0.449715 | -1.31242 | 0.278738 | Q9R1Q8   | Transgelin Tagln3      | QQNRRRGFSEEQLRQG |
| S | 1        | 1446 | 0.035058 | 0.742379 | 0.76519  | -0.13765 | A2A690   | Protein TA Tanc2       | QGLPVIQSPSSPAH   |
| S | 1        | 965  | 0.007723 | 0.157467 | -0.85184 | -0.31941 | Q5F2E8   | Serine/thr Taok1       | SSMGVRNSPQALRRT  |
| S | 1        | 22   | 0.000647 | 0.293646 | -1.71716 | 0.279528 | Q8BHL3   | TBC1 dom: Tbc1d10b     | HGAPAAPSPPPRGRSR |
| S | 0.994745 | 58   | 3.09E-05 | 0.004588 | -1.70507 | -0.52938 | Q80VE5   | Tbc1d22b               | LKNKASSHFHEFARN  |
| S | 0.998709 | 751  | 0.036874 | 0.014784 | 0.644414 | 0.73262  | Q8BYJ6-2 | TBC1 dom: Tbc1d4       | RETELLPLSPLSPTME |
| S | 0.986813 | 754  | 0.119322 | 0.015417 | 0.481772 | 0.78279  | Q8BYJ6-2 | TBC1 dom: Tbc1d4       | LLPLSPLSPTMEEEP  |
| S | 0.999958 | 565  | 0.540588 | 0.001031 | 0.427393 | -2.9098  | Q80XQ2   | TBC1 dom: Tbc1d5       | KTISSSPLSMEEPPG  |
| S | 0.998669 | 561  | 0.980297 | 0.041491 | 0.095684 | 1.638481 | Q80XQ2   | TBC1 dom: Tbc1d5       | GQSSKTISSSPSIES  |
| S | 0.999999 | 210  | 0.01277  | 0.016506 | -2.45096 | -2.0567  | Q62313   | Trans-Golgi Tgoln1;Tgc | TLTSKTESGETLAGD  |
| S | 1        | 243  | 0.005895 | 0.816011 | -1.60745 | 0.150765 | Q569Z6   | Thyroid hc Thrap3      | RASVSDLSPRRERSPA |
| S | 1        | 248  | 0.006363 | 0.252748 | -1.58294 | -0.46087 | Q569Z6   | Thyroid hc Thrap3      | DLSPRRERSPALKSPL |
| S | 1        | 253  | 0.009883 | 0.827591 | -0.87141 | -0.08888 | Q569Z6   | Thyroid hc Thrap3      | ERSPALKSPLQSVVV  |
| S | 1        | 935  | 2.47E-05 | 0.025196 | -3.02011 | -0.59153 | Q569Z6   | Thyroid hc Thrap3      | GEIEDGESTENREE   |
| S | 1        | 669  | 0.007726 | 0.11084  | -3.71987 | -1.5901  | Q569Z6   | Thyroid hc Thrap3      | EAAKKNKSPPIHRRRI |
| S | 1        | 912  | 0.005545 | 0.255035 | -1.37958 | 0.387328 | B9EHJ3   | Tjp1                   | QAIHRIDSPGLKPAS  |
| S | 1        | 912  | 0.005545 | 0.255035 | -1.37958 | 0.387328 | P39447   | Tight junct Tjp1       | QAIHRIDSPGLKPAS  |
| S | 1        | 175  | 0.020083 | 0.002819 | -2.21515 | -3.15551 | P39447   | Tight junct Tjp1       | SPRSDRRSVASSQPA  |
| S | 0.98158  | 467  | 0.255336 | 0.036757 | -0.5065  | -0.89936 | Q80W04   | Transmem Tmcc2         | GSATLVSSPKYGSDD  |
| S | 1        | 60   | 0.012933 | 0.132145 | -2.36601 | -1.07434 | Q8C996   | Transmem Tmem163       | ISESGQFSDGLEDRG  |
| S | 1        | 56   | 0.006292 | 0.01686  | -1.02137 | -0.71992 | Q8C996   | Transmem Tmem163       | RQPRISESGQFSDGL  |
| S | 1        | 60   | 0.006292 | 0.01686  | -1.02137 | -0.71992 | Q8C996   | Transmem Tmem163       | ISESGQFSDGLEDRG  |
| S | 0.999906 | 327  | 0.018567 | 0.866038 | -1.2259  | -0.12653 | B1AZA5   | Transmem Tmem245       | SSRSPPSPSPTLGR   |
| S | 0.999999 | 114  | 0.02552  | 0.361003 | -1.67901 | -0.56606 | Q99LG1   | Transmem Tmem51        | PHSQEEDSPEEEEDV  |
| S | 0.860163 | 151  | 0.02616  | 0.034021 | 1.309725 | 1.091165 | Q99LG1   | Transmem Tmem51        | QEKNPRLSISLPSYE  |
| T | 0.99945  | 159  | 0.018805 | 0.999102 | -1.11224 | -0.0089  | Q61029   | Lamina-as: Tmpo        | GTESRSSTPLPTVSS  |
| T | 0.99945  | 159  | 0.018805 | 0.999102 | -1.11224 | -0.0089  | Q61033   | Lamina-as: Tmpo        | GTESRSSTPLPTVSS  |
| S | 1        | 245  | 0.016333 | 0.412886 | -6.01891 | -1.65572 | Q8VBTO   | Thioredoxi Tmx1        | EADEEDVSEEEAEDR  |
| S | 1        | 72   | 0.002063 | 0.756037 | -1.44188 | 0.126628 | Q80YX1   | Tenascin Tnc           | SVDLESASGEKDLTP  |
| S | 1        | 740  | 0.028752 | 0.996691 | -1.20001 | -0.02062 | E9PUL9   | Traf2 and Ttnk         | ANSKSEGSVPVLPHEP |
| S | 0.999961 | 581  | 0.027121 | 0.247719 | -3.07804 | -1.29565 | E9PUL9   | Traf2 and Ttnk         | PALTASQSVHEQPTK  |
| S | 1        | 1612 | 0.049604 | 0.562059 | -1.6138  | 0.463625 | P58871   | 182 kDa ta Tnks1bp1    | RASRVSSDEEVVEE   |
| S | 1        | 429  | 0.000404 | 0.762294 | -3.57819 | -0.21798 | P58871   | 182 kDa ta Tnks1bp1    | SLAQRRFSEGLVQPP  |
| S | 1        | 911  | 0.005203 | 0.820622 | -1.83146 | 0.164424 | P58871   | 182 kDa ta Tnks1bp1    | KNLSRGYSSQDAEEQ  |
| S | 0.999998 | 1373 | 0.004665 | 0.016874 | 2.332822 | 1.534355 | P58871   | 182 kDa ta Tnks1bp1    | LDPKSSGSLSPGLET  |
| S | 0.998992 | 724  | 0.101345 | 0.027714 | -0.53354 | 0.703474 | Q8BYI9   | Tenascin-R Tnr         | RITFTPSSGISSEVT  |
| S | 0.996921 | 1313 | 0.042803 | 0.299287 | -1.11421 | -0.48266 | Q8BK12   | Trinucleoti Tnrc6b     | RQPSMKHSPSPVGP   |
| S | 0.999976 | 462  | 0.037357 | 0.356961 | 1.190591 | 0.448271 | O88746   | Target of T Tom1       | DRLPNLASPSAEGPP  |
| S | 0.999997 | 472  | 0.037357 | 0.356961 | 1.190591 | 0.448271 | O88746   | Target of T Tom1       | AEGPPRPSPGTAPRR  |
| S | 1        | 138  | 0.000835 | 0.986262 | -3.19418 | -0.04925 | Q9DCC8   | Mitochondonc Tomm20    | QRIVSAQSLAEDDVE  |
| S | 1        | 15   | 0.002833 | 0.993887 | -2.11238 | 0.028257 | Q9CPQ3   | Mitochondonc Tomm22    | AGAGEQLSPEELLPK  |
| S | 0.999755 | 479  | 0.146688 | 0.017287 | 0.898883 | 1.532551 | Q8CG79   | Apoptosis- Tp53bp2;T   | GTLRKNQSSDILRD   |
| S | 0.997304 | 168  | 0.043416 | 0.997977 | 1.273643 | 0.019171 | A2AUD5   | Tpd52l2                | HPLSQSFSSYSIRHS  |
| S | 0.999872 | 159  | 0.040783 | 0.871192 | -1.20688 | 0.150443 | Q7TQD2   | Tubulin po Tppp        | GVTKAVSSPTVSRILT |
| S | 1        | 2141 | 0.000109 | 0.27769  | -4.79086 | -0.55387 | F6ZDS4   | Nucleopro Tpr          | QTPQAPQSPRRPPHP  |
| S | 0.997229 | 14   | 0.042908 | 0.004145 | 1.397502 | 2.240913 | Q9DBS2   | Tumor pro Tprg1;Tpr    | TVDSAGTSPATAVLAA |
| S | 1        | 440  | 0.026605 | 0.996482 | -2.41021 | -0.04184 | Q9ESN6   | Tripartite r Trim2     | GVKRRVKSPSGSHVK  |

|   |          |      |          |          |          |           |          |                        |                  |
|---|----------|------|----------|----------|----------|-----------|----------|------------------------|------------------|
| S | 1        | 473  | 0.153886 | 0.011854 | -0.40846 | -0.77923  | Q62318   | Transcripti Trim28     | SGMKRSRSGEGEVSG  |
| S | 1        | 427  | 0.003379 | 0.997647 | -2.65327 | -0.02287  | Q9R1R2   | Tripartite r Trim3     | RPGLDPPSPDDVKRR  |
| S | 1        | 7    | 0.012575 | 0.910444 | -1.53972 | -0.115544 | Q9R1R2   | Tripartite r Trim3     | _MAKREDSPGPEVQP  |
| T | 1        | 41   | 0.013445 | 0.091848 | -3.88333 | -2.0237   | Q8C7M3   | E3 ubiquiti Trim9      | ARNILVQTPESESPQ  |
| S | 1        | 822  | 0.0312   | 0.734034 | -1.70796 | 0.303682  | A2AU91   | Tumor sup Trp53bp1;    | KDAVTEDSPQPPLPS  |
| S | 0.982093 | 268  | 0.043544 | 0.730977 | -3.17768 | -0.62456  | A2AU91   | Tumor sup Trp53bp1;    | RSEDRPSSPQVSVAA  |
| S | 1        | 533  | 0.00279  | 0.000209 | -1.85433 | -2.88691  | A2AU91   | Tumor sup Trp53bp1;    | SKMESLGSPrTEEDR  |
| S | 1        | 1096 | 0.000373 | 0.899066 | -4.12865 | -0.15109  | A2AU91   | Tumor sup Trp53bp1;    | AAPEDSASPVSQORA  |
| S | 0.999886 | 15   | 0.000341 | 0.153547 | -1.76563 | -0.33709  | Q9WTR1   | Transient r Trpv2      | PAFRLETSDGDEEGS  |
| S | 0.999177 | 1797 | 0.0276   | 0.884404 | -1.04929 | -0.11063  | F7CGG2   | Transform: Trrap       | AVFGRSQSLPGADSL  |
| S | 0.995463 | 1366 | 0.958594 | 0.027829 | -0.20702 | -1.26089  | Q61037-6 | Tuberin Tsc2           | QPLSKSSSSPELQTL  |
| S | 0.99981  | 38   | 0.946985 | 0.037167 | -0.18508 | 1.965049  | D3YZZ4   | Tsc22d4                | GCVSSPCSPRGSSPI  |
| S | 1        | 3    | 0.271407 | 0.007589 | -1.25139 | -3.41933  | O88852   | Testis-spec Tspyl1     | ____MSSPERDEGT   |
| S | 1        | 1222 | 0.031035 | 0.965633 | -1.03349 | 0.059192  | Q6PCN3   | Tau-tubuli Ttbk1       | SKPAAPRSPGLPAST  |
| T | 1        | 41   | 0.001051 | 0.018865 | -1.91525 | -0.881    | P05213   | Tubulin al; Tuba1b;Tu  | GQMPSDKTIGGGDDSD |
| S | 1        | 340  | 0.010394 | 0.280242 | -1.38514 | 0.429961  | P05213   | Tubulin al; Tuba1b;Tu  | AAIKTKRSIQFVDWC  |
| T | 1        | 55   | 0.04016  | 0.909226 | -1.12362 | -0.11509  | P68372   | Tubulin be Tubb4b      | NVYYNEATGGKYVPR  |
| S | 1        | 79   | 0.015444 | 0.872911 | -1.62891 | 0.15582   | P26369   | Splicing fac U2af2     | EHGLIRSPRHEKKK   |
| S | 1        | 202  | 0.013697 | 0.941856 | -1.3987  | 0.085201  | Q6NV83   | U2 snRNP- U2surp       | GEKEKKKSNLELFKE  |
| S | 1        | 146  | 0.026033 | 0.765468 | -1.91192 | -0.29921  | Q8BH48   | Ubiquitin-; Ubap1      | ATKQKVLSPHTKAD   |
| S | 0.999943 | 1761 | 0.021225 | 0.993624 | -2.62469 | 0.057871  | A2AN08-5 | E3 ubiquiti Ubr4       | LVRHASTSPADKAKV  |
| S | 0.999999 | 952  | 0.115278 | 0.016327 | -0.53598 | -0.8479   | A2RSJ4   | UHRF1-bin Uhrf1bp1     | PLLFKASDNTNLQKG  |
| S | 1        | 668  | 0.031077 | 0.771618 | -1.24955 | -0.20174  | Q7TMI3   | E3 ubiquiti Uhrf2      | EATKRPASDDECPGD  |
| S | 0.999999 | 450  | 0.715064 | 0.026736 | 0.280635 | -0.96461  | O70405   | Serine/thr; Ulk1       | RIEQNLQSPTQQQTA  |
| S | 1        | 2044 | 0.007095 | 0.261055 | -0.8714  | 0.256114  | B1AY13   | Ubiquitin c Usp24      | QRVSDQNSPVLPKKS  |
| S | 0.936641 | 796  | 0.838544 | 0.040763 | -0.12513 | -0.7066   | E9Q6Y8   | Ubiquitin c Usp31      | SKQASVTSAASSRRT  |
| S | 1        | 929  | 0.002931 | 0.967294 | -1.23647 | 0.038977  | M0QWN7   | Ubiquitin c Usp35      | DPAAEPGSPRVRAEP  |
| S | 1        | 675  | 0.012727 | 0.668571 | -2.12246 | -0.34649  | P35123   | Ubiquitin c Usp4       | EEGKEQLSEVEGSGE  |
| S | 1        | 779  | 0.002272 | 0.763144 | -2.12788 | -0.18741  | P56399   | Ubiquitin c Usp5       | MDISEGRSAAESISE  |
| T | 1        | 623  | 0.000597 | 0.902229 | -2.16094 | 0.085791  | P56399   | Ubiquitin c Usp5       | DIAPPLVTPDEPKGS  |
| S | 1        | 775  | 0.019574 | 0.007613 | -2.15539 | -2.43008  | P56399   | Ubiquitin c Usp5       | AEAAMDISEGRSAAE  |
| S | 0.999988 | 2547 | 0.004565 | 0.999732 | -1.03226 | -0.00321  | P70398   | Probable u Usp9x       | YEGGEEVSPQTKGS   |
| S | 1        | 63   | 0.385708 | 0.016394 | 0.308853 | -0.85695  | Q62442   | Vesicle-ass Vamp1      | LERDQKSELDDRAD   |
| S | 1        | 61   | 0.385708 | 0.016394 | 0.308853 | -0.85695  | P63044   | Vesicle-ass Vamp2;Va   | LERDQKSELDDRAD   |
| S | 1        | 30   | 0.003399 | 0.560862 | -1.88315 | -0.27729  | O70480   | Vesicle-ass Vamp4      | RNLLEDSDSEEDDF   |
| S | 0.999791 | 756  | 0.020107 | 0.473249 | -5.07348 | -1.32869  | Q8CDG3   | Deubiquiti Vcpi1       | TIRDGPSSAPATPTK  |
| T | 0.985187 | 760  | 1.99E-06 | 0.180356 | -5.45453 | -0.34194  | Q8CDG3   | Deubiquiti Vcpi1       | GSSAPATPKAPYS    |
| T | 0.978683 | 1397 | 0.003064 | 0.976885 | -5.3298  | 0.142081  | Q8BX70-2 | Vacuolar p Vps13c      | KACREVSTPQDVHTT  |
| S | 1        | 871  | 0.133775 | 0.022826 | -1.19006 | -1.82421  | Q8BX70-2 | Vacuolar p Vps13c      | LLLDGVESEDEEFF   |
| S | 1        | 873  | 0.133775 | 0.022826 | -1.19006 | -1.82421  | Q8BX70-2 | Vacuolar p Vps13c      | LDGVESEDEEFFDA   |
| S | 0.99988  | 223  | 0.00643  | 0.790451 | -3.66268 | -0.37878  | Q8VHI6   | Wiskott-AI Wasf3       | PDNRLSQSVHHGASS  |
| S | 0.999983 | 233  | 0.026369 | 0.593162 | -2.2519  | -0.51278  | Q8VHI6   | Wiskott-AI Wasf3       | HGASSEGLSPDTRS   |
| S | 0.999996 | 1942 | 0.00481  | 0.677196 | -4.33143 | 0.551671  | Q6VNB8   | WD repeat Wdfy3        | TGMNRSQSEYCNVGT  |
| S | 0.919614 | 208  | 0.034987 | 0.061723 | -2.95152 | -2.23942  | Q8K1X1   | WD repeat Wdr11        | VYISSPHSSPAHNKL  |
| S | 0.999261 | 347  | 0.001155 | 0.269505 | -2.89278 | 0.557457  | Q3UWE6   | WD repeat Wdr20        | FGRDRANSTQSRLSK  |
| S | 0.999468 | 175  | 0.2395   | 0.004425 | -0.69055 | -2.00996  | Q6PEV3   | WAS/WAS Wipf2          | TGMKHHSSAPPPPPP  |
| S | 1        | 211  | 0.022237 | 0.863386 | -0.90067 | 0.098457  | P0C7L0   | WAS/WAS Wipf3          | PIKAQLVSPAPPTK   |
| S | 1        | 665  | 0.045797 | 0.350827 | -1.23879 | -0.49944  | Q9Z0U0   | Xenotropic Xpr1        | RSWKYNQSIslRRPR  |
| S | 0.965002 | 1105 | 0.017662 | 0.60344  | -2.6207  | 0.527637  | B2RR83   | Probable A Ythdc2      | DGIPNDSSDSEMEDR  |
| S | 0.997606 | 210  | 0.016698 | 0.177661 | -2.48854 | -1.07211  | P62259   | 14-3-3 pro Ywhae       | IAELDTLSEESYKDS  |
| S | 0.998912 | 207  | 0.005109 | 0.024741 | -2.78527 | -1.69474  | P63101   | 14-3-3 pro Ywhae       | IAELDTLSEESYKDS  |
| S | 0.998513 | 64   | 0.000156 | 0.932526 | -3.6776  | 0.090399  | P63101   | 14-3-3 pro Ywhaz       | SSWRVVSIEQKTEG   |
| S | 1        | 198  | 0.002153 | 0.847091 | -2.03505 | 0.136617  | E9Q784   | Zc3h13                 | IIIQKEVSPVVRSK   |
| S | 1        | 77   | 0.03833  | 0.457244 | -0.76807 | -0.24568  | E9Q784   | Zc3h13                 | YSSNYRRSPERPTGD  |
| S | 0.999693 | 1059 | 0.086545 | 0.000851 | -0.76612 | -2.15436  | B0V2M3   | Zinc finger Zfp318;Zni | NEKSCIKSPSSTESL  |
| S | 0.999958 | 465  | 0.003715 | 0.440671 | -1.99069 | -0.36786  | A2A482   | Zmynd8                 | QAGSLSGSPKPFSPQ  |
| S | 0.999968 | 461  | 0.691987 | 0.048712 | -0.21177 | -0.76374  | A2A482   | Zmynd8                 | TKTGQAGSLSGSPKP  |
| S | 0.999958 | 465  | 0.691987 | 0.048712 | -0.21177 | -0.76374  | A2A482   | Zmynd8                 | QAGSLSGSPKPFSPQ  |
| S | 0.999996 | 559  | 0.009756 | 0.472086 | -4.46747 | -0.97975  | Q8BZ47   | Zinc finger Znf609     | VPQKGLSPPARSATP  |
| S | 1        | 606  | 0.017467 | 0.853412 | -1.58729 | -0.16972  | Q61464   | Zinc finger Znf638;Zfn | ETVDKGLSPAQKPKL  |

|   |          |     |          |          |          |          |        |                       |                 |
|---|----------|-----|----------|----------|----------|----------|--------|-----------------------|-----------------|
| S | 0.999926 | 18  | 0.021949 | 0.996967 | -2.96949 | -0.04549 | Q71FD5 | E3 ubiquitin Znf2     | NGRTRAYSGSDLPSG |
| S | 1        | 130 | 0.017962 | 0.032935 | -2.96901 | -2.26365 | D3Z4U0 | Zinc finger Zranb2    | EYIEREESDGEYDEF |
| S | 1        | 163 | 0.01041  | 0.492004 | -3.79055 | -0.81624 | D3Z4U0 | Zinc finger Zranb2    | KEVEDKESEGEEDE  |
| S | 1        | 198 | 0.006481 | 0.120758 | -1.9643  | -0.78147 | D3Z4U0 | Zinc finger Zranb2    | SKYNLDASEEEDSNK |
| S | 1        | 28  | 0.003738 | 0.893054 | -1.31013 | -0.08145 | POC913 | Overexpressed in colc | VKDTTEDSITEDDKR |

# STR

| Amino acid | Localization | Position      | nalf_pval | U50_pval  | log2_nalf_ | log2_U50_ | Protein   | Protein nar | Gene name  | Short sequence window |
|------------|--------------|---------------|-----------|-----------|------------|-----------|-----------|-------------|------------|-----------------------|
| S          |              | 0.999994 936  | 0.086645  | 0.008287  | 2.674727   | 4.527307  | Q3UHJ0    | AP2-associ  | Aak1       | GGHSRNSSGSSSESSL      |
| S          |              | 0.986558 676  | 0.611634  | 1.13E-06  | -0.164506  | -5.152286 | Q3UHJ0    | AP2-associ  | Aak1       | ATTPSGSPRTSQQN        |
| S          |              | 0.999999 88   | 0.038873  | 0.001102  | 0.516048   | 1.077737  | Q3THG9    | Alanyl-tRN  | Aarsd1;Gm  | HFTESPLSPGSQVQV       |
| S          |              | 0.888056 516  | 0.649994  | 0.047996  | 0.497134   | 1.649796  | Q80YE4    | Serine/thre | Aatk       | ELCAPDSSPPGVVPV       |
| S          |              | 0.999993 502  | 0.698207  | 0.04719   | -0.303492  | -1.119821 | Q8K4G5    | Actin-bindi | Ablm1      | TSQGSINSVPVSRHS       |
| S          |              | 1 387         | 0.507379  | 0.041232  | 0.450384   | -1.201881 | Q9R1V6-11 | Disintegrin | Adam22     | SDKRKLASGECKCED       |
| S          |              | 0.998242 934  | 0.225408  | 0.025151  | -0.467767  | -0.867327 | Q9R1V6-11 | Disintegrin | Adam22     | PAKSPSSSTGSIASS       |
| S          |              | 0.998242 868  | 0.225408  | 0.025151  | -0.467767  | -0.867327 | Q9R1V6    | Disintegrin | Adam22     | PAKSPSSSTGSIASS       |
| T          |              | 1 62          | 0.142252  | 0.021326  | 0.810697   | 1.294543  | P84309    | Adenylate   | Adcy5      | KRSGGAVTPQQQQRL       |
| S          |              | 0.998507 555  | 0.116365  | 0.015181  | 0.771372   | 1.246914  | E9Q1K3    |             | Add1       | GLAEQTFSPAHSVFS       |
| S          |              | 1 614         | 0.0158    | 0.096398  | -0.731762  | -0.390554 | Q9QYB8    | Beta-adduc  | Add2       | PSKAGTKSPAVSPSK       |
| S          |              | 1 618         | 0.0158    | 0.096398  | -0.731762  | -0.390554 | Q9QYB8    | Beta-adduc  | Add2       | GTKSPAVSPKTSSED       |
| S          |              | 1 614         | 0.258995  | 0.02721   | -0.375427  | -0.72867  | Q9QYB8    | Beta-adduc  | Add2       | PSKAGTKSPAVSPSK       |
| S          |              | 1 618         | 0.258995  | 0.02721   | -0.375427  | -0.72867  | Q9QYB8    | Beta-adduc  | Add2       | GTKSPAVSPKTSSED       |
| S          |              | 0.996724 532  | 0.032146  | 0.061962  | -0.957789  | -0.709157 | Q9QYB8    | Beta-adduc  | Add2       | AEKSRSPSTESQLMS       |
| S          |              | 1 423         | 0.761383  | 0.032144  | -0.718916  | 3.435436  | Q9QYB5    | Gamma-ad    | Add3       | EDDSAPLSPKLFMAQ       |
| S          |              | 1 42          | 0.007078  | 0.006044  | 2.34166    | 2.173073  | Q9QYB5    | Gamma-ad    | Add3       | YLRERNMSPDLRQDF       |
| S          |              | 1 210         | 0.985498  | 0.027348  | -0.0681    | 1.52765   | Q3UPL5    | Uncharacte  | Ag2        | AKKSFLQSLLELRRS       |
| S          |              | 0.999795 802  | 0.747284  | 0.046569  | 0.190783   | 0.79255   | Q3UHD9    | Arf-GAP wi  | Agap2      | RNLARALSTDCTPSG       |
| S          |              | 0.997369 281  | 0.044409  | 0.056825  | 1.639311   | 1.363903  | O88845    | A-kinase ar | Akap10     | GSRNCSLSPLELSE        |
| S          |              | 1 467         | 0.000616  | 0.000021  | 0.55804    | 1.002106  | Q9WTQ5    | A-kinase ar | Akap12     | HTQLTDLSPPEKMLP       |
| S          |              | 0.99999 36    | 0.005264  | 0.454668  | -0.93088   | -0.18189  | A2API8    |             | Akap2;Pak  | EPAASSLSLDHKNME       |
| S          |              | 0.997296 480  | 0.126206  | 0.012932  | 0.504205   | 0.873376  | E9Q9K8    |             | Akap6      | HIKEISSSLGRLTDC       |
| S          |              | 0.996543 124  | 0.567922  | 0.0373525 | -0.297894  | 0.830759  | P31750    | RAC-alpha   | Akt1       | TMDFRSGSPSDNSGA       |
| T          |              | 0.999987 247  | 0.991041  | 0.00911   | 0.071322   | -2.689839 | Q9D1F4    | Proline-ric | Akt1s1     | LPRRLNTSDFQKLK        |
| S          |              | 1 244         | 0.726658  | 0.001426  | 0.216364   | 1.9878    | Q7TQF7    | Amphiphys   | Amph       | QHADKAFAISQAPSD       |
| S          |              | 0.999374 1722 | 0.999672  | 0.037863  | 0.010344   | 1.421027  | S4R291    | Ankyrin-2   | Ank2       | LPTAKATSPGIEETP       |
| S          |              | 1 1925        | 0.46863   | 0.046135  | 0.354086   | 0.856443  | S4R291    | Ankyrin-2   | Ank2       | HEKHLVPSPGKTEKQ       |
| S          |              | 1 2085        | 0.566778  | 0.005324  | 0.164173   | 0.814015  | S4R291    | Ankyrin-2   | Ank2       | GDMDFQISPRDKTST       |
| S          |              | 1 2359        | 0.34402   | 0.024435  | 0.463196   | 1.079596  | S4R291    | Ankyrin-2   | Ank2       | KPQGAIIRSPQGLELP      |
| S          |              | 1 3231        | 0.801573  | 0.012623  | 0.151876   | 1.033293  | S4R291    | Ankyrin-2   | Ank2       | SSPEEQKSVIEIPTA       |
| T          |              | 1 2494        | 0.008227  | 0.00364   | -1.420577  | -1.533823 | S4R291    | Ankyrin-2   | Ank2       | KSPLSPDTPSSEEV        |
| S          |              | 0.996647 1526 | 0.036041  | 0.364534  | 3.248228   | 1.195155  | S4R2K9    |             | Ank3       | KSGSLSSSPNTPSA        |
| S          |              | 1 486         | 0.003411  | 0.998772  | -0.937302  | -0.005847 | B2RW11    |             | Ankrd34a   | RLGFGFQSLGGPGEP       |
| S          |              | 1 260         | 0.211864  | 0.018406  | 0.75373    | 1.473237  | Q3UUF8    | Ankyrin re  | Ankrd34b   | KHQRVASLQEEQLD        |
| S          |              | 1 653         | 0.821216  | 0.018038  | -0.202321  | -1.33912  | Q8K298    | Actin-bindi | Anln       | TRVPRAESADSLGSE       |
| S          |              | 1 656         | 0.821216  | 0.018038  | -0.202321  | -1.33912  | Q8K298    | Actin-bindi | Anln       | PRAESADSLGSEDRD       |
| S          |              | 1 659         | 0.821216  | 0.018038  | -0.202321  | -1.33912  | Q8K298    | Actin-bindi | Anln       | ESADSLGSEDRDLLY       |
| S          |              | 1 754         | 0.030855  | 0.140572  | 1.855978   | 1.030083  | O54774    | AP-3 comp   | Ap3d1      | EKGKRRRHSLPTESD       |
| S          |              | 0.999999 851  | 0.027035  | 0.541433  | -0.774786  | -0.194949 | Q80V94    | AP-4 comp   | Ap4e1      | SELFRSESLGPPSA        |
| S          |              | 1 330         | 0.033018  | 0.947063  | -1.498596  | -0.109197 | V9GWV1    | ADP-ribosy  | Arfgap1    | AEPKAKSPSSDSWT        |
| S          |              | 0.999987 240  | 0.010002  | 0.076294  | -1.831611  | 0.943653  | A2A5R2    | Brefeldin A | Arfgef2    | LKQSQQAQSKPTTPEK      |
| S          |              | 1 856         | 0.169413  | 0.006854  | -0.378442  | -0.855106 | Q811P8    | Rho GTPas   | Arhgap32   | TASSEVPSPVQEKLS       |
| S          |              | 0.997274 871  | 0.484681  | 0.031092  | 0.323952   | 0.899277  | Q811P8    | Rho GTPas   | Arhgap32   | PFFTLDSLPTDDKSS       |
| S          |              | 0.999982 1328 | 0.04893   | 0.924027  | -2.41478   | 0.237929  | F8VQN6    | Rho guanir  | Arhgef12   | GDIATCDSPTSTES        |
| S          |              | 0.999721 1485 | 0.039712  | 0.525325  | 2.371424   | -0.68191  | Q3UPH7    | Rho guanir  | Arhgef40   | SPSLQPPSPGSSTPA       |
| S          |              | 1 269         | 0.030514  | 0.067733  | 1.715834   | 1.218619  | P98203    | Armadillo r | Arcvf      | GLEDDTRLSLAADDEG      |
| S          |              | 1 712         | 0.978278  | 0.02755   | 0.04214    | 0.768577  | Q6PIC6    | Sodium/po   | Atp1a2;Atp | TGDDGVNDSPALKKAD      |
| S          |              | 0.945867 1160 | 0.000344  | 0.632423  | -3.196505  | -0.25143  | Q9R0K7    | Plasma me   | Atp2b2     | QNSSPPSSLNKNNSA       |
| S          |              | 1 1116        | 0.002989  | 0.724027  | -2.112845  | -0.217839 | S4R1C4    | Calcium-tr  | Atp2b2     | QGALRRQSSVTSQSQ       |
| S          |              | 0.999991 1117 | 0.004558  | 0.726564  | -1.932379  | -0.217839 | S4R1C4    | Calcium-tr  | Atp2b2     | GALRRQSSVTSQSQD       |
| T          |              | 1 36          | 0.331332  | 0.007814  | 0.298961   | 0.904459  | Q91XV3    | Brain acid  | Basp1      | AGTTEEGTPKSESE        |
| S          |              | 0.999953 495  | 0.021692  | 0.89157   | -1.049232  | 0.100237  | Q3UTZ3    | Uncharacte  | BC037034   | RPLSRKSSPSPAVR        |
| S          |              | 1 615         | 0.184861  | 0.048515  | 0.682298   | 0.96633   | Q80YN3    | Breast carc | Bcas1      | GLGPKRMSDAQVQTD       |
| S          |              | 0.985049 498  | 0.181908  | 0.041425  | 0.524242   | 0.77175   | Q80YN3    | Breast carc | Bcas1      | RQMSVRSSEGI           |
| S          |              | 1 601         | 0.236139  | 0.023259  | 0.633073   | 1.224571  | Q80YN3    | Breast carc | Bcas1      | KSEKRRQSLGGFLKG       |
| S          |              | 1 559         | 0.705179  | 0.012589  | -0.14675   | -0.780136 | F8WIG2    | Brain-enric | Begain     | VQLCGAGSSPEPEHG       |
| S          |              | 1 560         | 0.705179  | 0.012589  | -0.14675   | -0.780136 | F8WIG2    | Brain-enric | Begain     | QLCGAGSSPEPEHGS       |
| S          |              | 0.999774 324  | 0.575671  | 0.007745  | 0.221294   | 1.0217    | O08539    | Myc box-d   | Bin1       | PEPASGASPGATIPK       |
| S          |              | 1 399         | 0.022298  | 0.001307  | 0.529331   | 0.916959  | Q5RJI5    | Serine/thre | Brsk1      | KRRPERKSMELVLSIT      |

|   |          |      |          |          |           |           |        |               |          |                  |
|---|----------|------|----------|----------|-----------|-----------|--------|---------------|----------|------------------|
| S | 1        | 383  | 0.465913 | 0.007629 | 0.242559  | 0.92838   | G3UWV4 | Serine/thr    | Brsk2    | KRRPERKSMEVLSVT  |
| S | 1        | 383  | 0.465913 | 0.007629 | 0.242559  | 0.92838   | Q69Z98 | Serine/thr    | Brsk2    | KRRPERKSMEVLSVT  |
| S | 0.999998 | 394  | 0.545119 | 0.009688 | 0.25236   | 1.045934  | Q69Z98 | Serine/thr    | Brsk2    | LSVTDGGSPVPARRA  |
| S | 0.999613 | 446  | 0.893338 | 0.023393 | -0.089807 | -0.744071 | G3UWV4 | Serine/thr    | Brsk2    | ASSGLSTSPSSPRV   |
| S | 1        | 235  | 0.028456 | 0.018505 | 0.737678  | 0.738333  | O88737 | Protein ba    | Bsn      | TTAPRSKSKQQLHSP  |
| S | 0.999973 | 2645 | 0.393382 | 0.002617 | -1.088344 | -4.704623 | O88737 | Protein ba    | Bsn      | RSRLSRHSDSGSDSK  |
| S | 0.999999 | 2647 | 0.455021 | 0.004199 | -1.088344 | -4.695032 | O88737 | Protein ba    | Bsn      | RLSRHSDSGSDSKHHD |
| S | 1        | 148  | 0.154699 | 0.023104 | 1.710304  | 2.763115  | Q8R149 | BUD13 hor     | Bud13    | RHDTPDPSPPRKARH  |
| S | 0.999995 | 396  | 0.88574  | 0.042429 | 0.118443  | 0.803347  | Q80X80 | C2 domain     | C2cd2l   | PGPGKLSLPAATVTA  |
| S | 1        | 411  | 0.88574  | 0.042429 | 0.118443  | 0.803347  | Q80X80 | C2 domain     | C2cd2l   | ELHYEQSGSPRNLGTP |
| S | 0.675234 | 832  | 0.004175 | 0.155657 | -3.383475 | 1.105468  | D3YXF5 |               | C7       | RCRGQSISITAIPKC  |
| S | 0.961326 | 2028 | 0.079113 | 0.048846 | 1.242703  | 1.288352  | P97445 | Voltage-de    | Cacna1a  | EMGTGDGYSDESHYLP |
| S | 1        | 450  | 0.024813 | 0.45217  | 3.228834  | 0.925655  | P97445 | Voltage-de    | Cacna1a  | DQLADIASVSGSPFAR |
| S | 1        | 453  | 0.038022 | 0.724646 | 3.232498  | 0.620638  | P97445 | Voltage-de    | Cacna1a  | ADIASVSGSPFARASI |
| S | 0.999964 | 1038 | 0.416714 | 0.023517 | -0.465447 | -1.240747 | P97445 | Voltage-de    | Cacna1a  | LATGEPASPHDSLGH  |
| S | 0.994504 | 1042 | 0.062421 | 0.027448 | -1.679395 | -1.897912 | P97445 | Voltage-de    | Cacna1a  | EPASPHDSLGHSGLP  |
| S | 0.999992 | 1051 | 0.526476 | 0.00583  | -0.49762  | -2.249969 | P97445 | Voltage-de    | Cacna1a  | GHSGLPSPPAKIGNS  |
| S | 0.994452 | 477  | 0.013356 | 1.55E-05 | 0.418969  | -1.599154 | Q8R0S4 | Voltage-de    | Cacnb4   | RNRLLSSSSQHSRDHY |
| S | 1        | 253  | 0.141491 | 0.008264 | -0.369188 | -0.743614 | O88602 | Voltage-de    | Cacng2   | PSHSRDASPVGVKGF  |
| T | 1        | 376  | 0.009252 | 0.007473 | 1.208335  | 1.136946  | Q99N28 | Cell adhesi   | Cadm3    | DDAPDADTAIINAEG  |
| S | 0.999012 | 358  | 0.085519 | 0.049531 | 2.004049  | 2.122324  | Q5SVJ0 | Calcium/ca    | Camk2b   | GVKQPQTNSTKNSSAI |
| S | 1        | 1259 | 0.507993 | 0.01812  | 0.247601  | 0.824246  | Q6P9K8 | Caskin-1      | Caskin1  | VPLPGPGSPEVKRAH  |
| S | 1        | 1818 | 0.022231 | 0.084692 | -1.27553  | -0.775527 | Q9WUF3 | CASP8-assc    | Casp8ap2 | GHKRKNKSPGVSHSS  |
| S | 0.999996 | 253  | 0.031341 | 0.001536 | 0.453691  | 0.8308    | A2AEV7 |               | Ccdc120  | FRAVSGGSPERRAPW  |
| S | 1        | 15   | 0.160213 | 0.022307 | 0.426327  | 0.704796  | Q8CI71 | Coiled-coil   | Ccdc132  | MTRQGLKSPPELND   |
| S | 1        | 559  | 0.040197 | 0.034044 | -0.826173 | -0.773983 | Q8CI71 | Coiled-coil   | Ccdc132  | SAYQDYDSDSDVPEE  |
| S | 1        | 561  | 0.040197 | 0.034044 | -0.826173 | -0.773983 | Q8CI71 | Coiled-coil   | Ccdc132  | YQDYDSDSDVPEELK  |
| S | 1        | 50   | 0.077709 | 0.005428 | 0.773183  | 1.394527  | Q3TVA9 | Coiled-coil   | Ccdc136  | MGKHRGLSLTELE    |
| S | 1        | 261  | 0.030201 | 0.060777 | 0.918608  | 0.672657  | Q8VDN4 | Coiled-coil   | Ccdc92   | RSATGQHSPARDKPH  |
| S | 1        | 211  | 0.965847 | 0.006333 | -0.076207 | -1.587073 | Q9D6J3 | Coiled-coil   | Ccdc94   | HRRLLEDESEDEAP   |
| S | 1        | 213  | 0.972976 | 0.008891 | -0.076207 | -1.652028 | Q9D6J3 | Coiled-coil   | Ccdc94   | RLEDESEDEEAPPS   |
| S | 1        | 83   | 0.016064 | 0.006712 | 1.079733  | 1.192583  | Q8BGU5 | Cyclin-Y      | Ccny     | DVREKRKSLFINHHP  |
| S | 0.999973 | 440  | 0.950835 | 0.034065 | -0.137781 | -1.558761 | Q69ZA1 | Cyclin-depr   | Cdk13    | RSRHSSISPTLTLK   |
| S | 1        | 326  | 0.818771 | 0.039936 | -0.297966 | -1.582497 | Q69ZA1 | Cyclin-depr   | Cdk13    | PLGGRDESPVSHRAS  |
| S | 1        | 316  | 0.791104 | 0.020361 | -0.297966 | -1.743171 | Q69ZA1 | Cyclin-depr   | Cdk13    | AYRRRQRSLSPLGGR  |
| S | 1        | 318  | 0.916971 | 0.032304 | -0.297966 | -2.593792 | Q69ZA1 | Cyclin-depr   | Cdk13    | RRRQRSLSPLGGRDE  |
| S | 0.999999 | 829  | 0.091643 | 0.012496 | 0.488078  | 0.762323  | Q6A065 | Centrosom     | Cep170   | KSLVRQGSFTIDKPS  |
| S | 0.99882  | 24   | 0.009402 | 0.084277 | -2.260681 | -1.111183 | P18760 | Cofilin-1     | Cfl1     | DMKVRKSTPEEVKK   |
| S | 1        | 1194 | 0.139575 | 0.009327 | 0.654824  | 1.274803  | E9QKH0 | CLIP-associ   | Clasp1   | IEKSFSTRSQEDLNPE |
| S | 1        | 535  | 0.04667  | 0.077961 | 1.645227  | 1.258766  | F7DCH5 | CLIP-associ   | Clasp2   | PSVQGCRESARES    |
| S | 0.999999 | 461  | 0.30856  | 0.037053 | 1.061106  | 2.075458  | F7DCH5 | CLIP-associ   | Clasp2   | RTKMVVSQSPGSRSG  |
| S | 1        | 531  | 0.039559 | 0.158455 | 3.044842  | 1.727807  | F7DCH5 | CLIP-associ   | Clasp2   | RIPRPSVSQGCSCREA |
| S | 1        | 535  | 0.03411  | 0.079181 | 4.344215  | 3.02718   | F7DCH5 | CLIP-associ   | Clasp2   | PSVSQGCRESARES   |
| S | 0.999847 | 401  | 0.502437 | 0.025112 | 0.363207  | -1.100523 | B9EHT4 | CAP-Gly do    | Clip3    | KGKKSPPSSPLGSL   |
| S | 1        | 100  | 0.428776 | 0.027779 | 0.442569  | 1.152093  | Q923F1 |               | Clns1a   | EESKEPLSDEDEEDN  |
| S | 1        | 169  | 0.009909 | 0.005092 | 0.861357  | 0.900786  | P16330 | 2',3'-cyclic- | Cnp      | EKNQWQLSADDLKKL  |
| S | 1        | 556  | 0.999127 | 0.034933 | -0.014583 | -1.254427 | Q9Z140 | Copine-6      | Cpne6    | PAMTPSPSP_____   |
| S | 1        | 656  | 0.811207 | 0.000761 | 0.288322  | 3.806587  | Q6P1J1 | Dihydropyr    | Crmp1    | HQSNFSLSGAQIDDN  |
| S | 1        | 638  | 0.264571 | 0.02371  | -1.609255 | -3.274015 | Q6P1J1 | Dihydropyr    | Crmp1    | PSAKSSPSKHQPPPI  |
| T | 1        | 683  | 0.414096 | 0.019471 | -2.375735 | -6.621152 | Q6P1J1 | Dihydropyr    | Crmp1    | PGGRSNITSLG_____ |
| S | 1        | 346  | 0.866835 | 0.036694 | -0.250116 | -1.622997 | P30999 | Catenin de    | Ctnnd1   | LAQHERGLASLDSL   |
| S | 1        | 349  | 0.866835 | 0.036694 | -0.250116 | -1.622997 | P30999 | Catenin de    | Ctnnd1   | HERGLASLDSLKRG   |
| S | 1        | 352  | 0.866835 | 0.036694 | -0.250116 | -1.622997 | P30999 | Catenin de    | Ctnnd1   | GSLASLDSLKRGMP   |
| S | 0.960205 | 356  | 0.093092 | 0.0175   | 0.668425  | 0.965016  | E9QKH8 | Catenin de    | Ctnnd2   | IGTYATLSPTKRLVH  |
| S | 0.999513 | 456  | 0.995491 | 0.021349 | -0.022685 | 0.97812   | E9QKH8 | Catenin de    | Ctnnd2   | FRTSTAPSSPGVDSV  |
| S | 0.998618 | 457  | 0.995491 | 0.021349 | -0.022685 | 0.97812   | E9QKH8 | Catenin de    | Ctnnd2   | RTSTAPSSPGVDSVP  |
| S | 0.960205 | 356  | 0.263642 | 0.034488 | 2.064484  | 3.791091  | E9QKH8 | Catenin de    | Ctnnd2   | IGTYATLSPTKRLVH  |
| T | 0.998749 | 453  | 0.995056 | 0.023213 | -0.022685 | 0.913737  | E9QKH8 | Catenin de    | Ctnnd2   | TGTFRTSTAPSSPGV  |
| S | 1        | 407  | 0.343282 | 2.88E-05 | 0.379948  | -3.880773 | Q60598 | Src substra   | Ctnn     | QTPPASPSQPIEDR   |
| S | 1        | 392  | 0.245759 | 0.045004 | 0.504284  | 0.829927  | Q9JLM8 | Serine/thr    | Dcl1     | RGWRRREESEEGFIQ  |
| S | 0.999076 | 337  | 0.997787 | 0.014017 | -0.037441 | -2.565778 | Q9JLM8 | Serine/thr    | Dcl1     | SPSPSPSPGSLRKKQ  |

|   |          |      |          |          |           |           |          |              |             |                  |
|---|----------|------|----------|----------|-----------|-----------|----------|--------------|-------------|------------------|
| S | 0.994594 | 359  | 0.011062 | 0.010011 | -2.068016 | -1.894821 | Q6PGN3-5 | Serine/thre  | DclK2       | SSSSPTSPGSRGL    |
| S | 1        | 25   | 0.000591 | 0.999778 | -1.922772 | 0.003483  | Q921N6   | Probable A   | Ddx27       | PVEPESDSGDEEEEG  |
| S | 0.999697 | 473  | 0.050275 | 0.010023 | 1.111651  | 1.518659  | Q8K382   | DENN dom     | Dennd1a     | PLPKTMPSQAETQD   |
| S | 0.999941 | 418  | 0.939359 | 0.026628 | -0.474847 | 5.14514   | Q6NS52   | Diacylglyce  | Dgkb        | NKMQRANSVTMDGQG  |
| S | 0.999331 | 137  | 0.067907 | 0.047322 | 1.675006  | 1.66984   | E9QNN1   | ATP-depen    | Dhx9        | VESSGYSGPGTWDR   |
| S | 1        | 248  | 0.068879 | 0.024552 | 2.572939  | 3.087533  | Q8BJ42   | Disks large  | Dlgap2      | KLFTKSHSLEGSSKS  |
| S | 0.999664 | 269  | 0.388174 | 0.004104 | -1.396295 | -5.407952 | Q9WV69   | Dematin      | Dmtn        | PIRRKTRSLPDRTPF  |
| S | 1        | 451  | 0.306326 | 0.039731 | -0.689285 | 1.316779  | Q8BPN8   | DmX-like p   | Dmxl2       | MKLDHELSDRESEA   |
| S | 0.999953 | 10   | 0.113299 | 0.047217 | 1.125593  | 1.33047   | P60904   | DnaJ homo    | Dnajc5      | DQRQRSLSTSGESLY  |
| S | 0.981065 | 764  | 0.216127 | 0.004781 | 0.416151  | 1.134603  | Q80TZ3-3 | Putative ty  | Dnajc6      | GGFPPLSSPQKASPO  |
| S | 0.999493 | 512  | 0.321833 | 0.038089 | 0.677822  | 1.347135  | P39053-4 | Dynamamin-1  | Dnm1        | QMNNKKTSGNQDEIL  |
| S | 0.999883 | 851  | 0.314331 | 0.004699 | 0.350302  | 1.15729   | P39053-4 | Dynamamin-1  | Dnm1        | PSRSGQASPRPESP   |
| S | 1        | 522  | 0.193911 | 0.01663  | -3.119026 | -6.016383 | O08553   | Dihydropry   | Dpysl2      | PASSAKTSPAKQQAP  |
| S | 1        | 537  | 0.39385  | 0.024735 | -0.670638 | -1.697183 | O08553   | Dihydropry   | Dpysl2      | PVRNLHQSGFSLSGA  |
| S | 1        | 540  | 0.39385  | 0.024735 | -0.670638 | -1.697183 | O08553   | Dihydropry   | Dpysl2      | NLHQSGFSLSGAQID  |
| S | 1        | 542  | 0.39385  | 0.024735 | -0.670638 | -1.697183 | O08553   | Dihydropry   | Dpysl2      | HQSGFSLSGAQIDDN  |
| S | 0.736273 | 7475 | 0.000948 | 0.333709 | -3.508487 | -0.576834 | S4R1P5   | Dystonin     | Dst         | MLRSESNSSITATQP  |
| S | 1        | 405  | 0.07237  | 0.017476 | 0.639008  | 0.85026   | Q8R1Q8   | Cytoplasmic  | Dync1li1    | SPRVPGGSRPTPNRS  |
| S | 0.9966   | 516  | 6.86E-06 | 0.013357 | -6.100284 | -1.084169 | Q8R1Q8   | Cytoplasmic  | Dync1li1    | VSPTTPTSPTGEAS   |
| S | 1        | 405  | 0.058234 | 0.037709 | 1.709801  | 1.734732  | Q8R1Q8   | Cytoplasmic  | Dync1li1    | SPRVPGGSRPTPNRS  |
| T | 0.998775 | 513  | 0.075901 | 0.044317 | -0.906969 | -0.954367 | Q8R1Q8   | Cytoplasmic  | Dync1li1    | PASVSPPTPTSPTTEG |
| T | 1        | 408  | 0.058542 | 0.037791 | 1.600151  | 1.625081  | Q8R1Q8   | Cytoplasmic  | Dync1li1    | VPGGSRPTPNRSVSS  |
| S | 0.989463 | 244  | 0.688747 | 0.014121 | -0.205135 | -1.022479 | Q69ZW3   | EH domain    | Ehbp1       | PSAKSASSSEELINT  |
| S | 1        | 446  | 0.131216 | 0.028028 | 0.722685  | 1.041734  | Q69ZW3   | EH domain    | Ehbp1       | PKPSPIPSPVLGQKP  |
| S | 0.989463 | 241  | 0.139842 | 0.011526 | -1.617391 | -2.99408  | Q69ZW3   | EH domain    | Ehbp1       | ANVPSAKSASSSEEL  |
| S | 0.989463 | 244  | 0.233833 | 0.03799  | -1.617391 | -2.727382 | Q69ZW3   | EH domain    | Ehbp1       | PSAKSASSSEELINT  |
| S | 1        | 120  | 0.996319 | 0.031841 | 0.023763  | -1.020024 | Q8JZQ9   | Eukaryotic   | Eif3b       | GAEEEGSDGSAAEA   |
| S | 0.999992 | 79   | 0.901597 | 0.039416 | -0.368176 | -2.767131 | Q8JZQ9   | Eukaryotic   | Eif3b       | TATSPAASPTQSAE   |
| S | 0.999955 | 108  | 0.262691 | 0.001338 | -0.203843 | -0.809197 | Q05D44   | Eukaryotic   | Eif5b       | GQKGGKTSFDENDSE  |
| S | 1        | 114  | 0.262691 | 0.001338 | -0.203843 | -0.809197 | Q05D44   | Eukaryotic   | Eif5b       | TSFDENDSELEDKD   |
| S | 1        | 544  | 0.998897 | 0.018336 | -0.048436 | -4.396486 | A2AUK5   | Band 4.1-lil | Epb4.1l1;Ej | RLPSSPASPSKPGTP  |
| S | 1        | 96   | 0.199329 | 0.043636 | 0.712814  | 1.075147  | Q9WV92   | Band 4.1-lil | Epb4l13     | QFEDDKLSQRSSSSK  |
| S | 0.993316 | 416  | 0.000127 | 0.124236 | 4.525254  | 0.762755  | Q80VP1   | Epsin-1      | Epn1        | LRTALPTSSTGEL    |
| S | 0.937526 | 340  | 0.479096 | 0.034479 | -0.880316 | -2.353055 | Q925F2   | Endothelia   | Esam        | GTFTPTPSVSSQALS  |
| S | 0.833114 | 661  | 0.037576 | 0.043841 | -2.266913 | -1.941044 | Q3TZZ7   | Extended s   | Esyt2       | HRDLGRSSSSLLASP  |
| S | 0.997641 | 662  | 0.040234 | 0.049069 | -2.100516 | -1.774647 | Q3TZZ7   | Extended s   | Esyt2       | RDLGRSSSSLLASPS  |
| S | 0.99972  | 663  | 0.037576 | 0.043841 | -2.266913 | -1.941044 | Q3TZZ7   | Extended s   | Esyt2       | DLGRSSSSLLASPSH  |
| S | 1        | 367  | 0.7059   | 0.02656  | 0.184263  | 0.81109   | P70429   | Ena/VASP-l   | Evl         | SRVKPAGSVNDVGLD  |
| S | 0.999999 | 257  | 0.032642 | 0.009725 | 1.38384   | 1.685196  | Q8C739   | Protein FAI  | Fam110b     | PSLQSRKSDLSDRYF  |
| S | 0.989253 | 267  | 0.010207 | 0.962132 | -0.85808  | 0.038923  | Q9DB52   | Protein FAI  | Fam122a     | TTTDSVPVSAQAASP  |
| S | 1        | 630  | 0.247233 | 0.009949 | -0.598876 | -1.464587 | Q5XG69   | Soluble lan  | Fam169a     | AEKAVDSSSEIEIEV  |
| S | 1        | 631  | 0.247233 | 0.009949 | -0.598876 | -1.464587 | Q5XG69   | Soluble lan  | Fam169a     | AEKAVDSSSEIEIEVE |
| S | 1        | 632  | 0.247233 | 0.009949 | -0.598876 | -1.464587 | Q5XG69   | Soluble lan  | Fam169a     | EKAVDSSSEIEIEVEV |
| S | 1        | 849  | 0.061806 | 0.030579 | 1.161753  | 1.271454  | A2ATK9   | Fam171a1     |             | VPLEPLASNQRSSA   |
| T | 0.999667 | 196  | 0.983675 | 0.013972 | 0.049384  | -1.239665 | Q8K4Z2   | Fibronectin  | Fndc5       | KSASETSTPEHQGGG  |
| S | 1        | 402  | 0.934595 | 0.000192 | -0.115077 | -3.645613 | P42128   | Forkhead t   | Foxk1       | FGPLSSRSAPASPTH  |
| S | 0.999926 | 406  | 0.877461 | 6.77E-05 | -0.115077 | -3.219221 | P42128   | Forkhead t   | Foxk1       | SSRSAPASPTHPLGLM |
| S | 1        | 402  | 0.047233 | 0.087292 | -1.426953 | -1.055964 | P42128   | Forkhead t   | Foxk1       | FGPLSSRSAPASPTH  |
| S | 0.999926 | 406  | 0.047233 | 0.087292 | -1.426953 | -1.055964 | P42128   | Forkhead t   | Foxk1       | SSRSAPASPTHPLGLM |
| S | 1        | 414  | 0.047233 | 0.087292 | -1.426953 | -1.055964 | P42128   | Forkhead t   | Foxk1       | PTHPLMSPRSSGLQ   |
| S | 0.999948 | 24   | 0.000914 | 0.976313 | -3.452612 | 0.07156   | Q3UFK8   | FERM dom     | Frmf8       | SHRSSVSSVGARAAD  |
| S | 0.999999 | 1936 | 0.13109  | 0.00617  | 0.587252  | 1.230938  | E9Q8I9   | Protein fur  | Fry         | SDLFTVLSRSSPDL   |
| S | 0.994605 | 143  | 0.294828 | 0.017552 | 0.402247  | 0.935584  | Q9Z158   | GRB2-asso    | Gab2        | ASHGRSSPAEFSSS   |
| S | 0.998676 | 803  | 0.311686 | 0.02885  | -0.374875 | -0.789633 | Q3V0G7-2 | GTPase-act   | Garnl3      | KGASAHTSPQTPPAR  |
| T | 1        | 806  | 0.311686 | 0.02885  | -0.374875 | -0.789633 | Q3V0G7-2 | GTPase-act   | Garnl3      | SAHTSPQTPPARDTP  |
| S | 1        | 96   | 0.017334 | 0.143989 | 2.422548  | 1.145647  | Q8CHY6   | Transcripti  | Gatad2a     | KSEKRPPSPDVIVLS  |
| S | 1        | 130  | 0.341009 | 0.007194 | -0.324003 | -1.01656  | Q8VHR5   | Transcripti  | Gatad2b     | SPDIIVLSDNEASSP  |
| S | 0.999987 | 567  | 0.391235 | 0.011066 | 0.829027  | -2.558687 | Q8BMI3   | ADP-ribosy   | Gga3        | PLFQSQSQPQKPEL   |
| S | 1        | 372  | 0.005689 | 0.001858 | 0.798494  | 0.91822   | P23242   | Gap junctio  | Gja1        | SRASSRASSRPRPDD  |
| S | 0.999849 | 257  | 0.293915 | 0.027546 | -0.588293 | -1.214954 | P23242   | Gap junctio  | Gja1        | TTGPLSPSKDCGSPK  |
| S | 0.980125 | 325  | 0.047901 | 0.603107 | -3.076079 | 0.811476  | P23242   | Gap junctio  | Gja1        | NRMGQAGSTISNSHA  |

|   |          |      |          |          |           |           |          |                                |                  |
|---|----------|------|----------|----------|-----------|-----------|----------|--------------------------------|------------------|
| T | 0.999986 | 50   | 0.04715  | 0.783448 | 2.66814   | 0.468701  | P36916   | Guanine nucleotide synthetase  | RREEQTDSDGESVT   |
| S | 1        | 35   | 0.075297 | 0.022289 | 0.992411  | 1.256253  | Q9CRA5   | Golgi phosphatase              | AAGGGGGSGEDEAQS  |
| S | 0.990797 | 200  | 4.17E-05 | 1.19E-05 | -6.846918 | -7.900142 | Q8BUV3   | Gephyrin                       | LSPPTTSPHKQTED   |
| S | 0.999869 | 691  | 0.213103 | 0.039697 | -3.650361 | -5.825729 | Q3UNH4   | G protein-coupled receptor     | AAAAAQKSPSAEAAA  |
| S | 1        | 491  | 0.045771 | 0.001119 | 0.544626  | 1.18746   | Q6IR34   | G-protein-coupled receptor     | GIPRAPSSDEECFFD  |
| S | 1        | 1059 | 0.94454  | 0.012875 | 0.156109  | -2.133982 | P35436   | Glutamate receptor             | LPEEVAHSDISETSS  |
| S | 0.999983 | 1062 | 0.96708  | 0.008056 | 0.156109  | -3.131109 | P35436   | Glutamate receptor             | EVAHSDISETSSRAT  |
| S | 1        | 645  | 0.105676 | 0.01963  | -0.647271 | -0.947678 | Q9Z1E4   | Glycogen phosphorylase         | RPASVPPSPSLSRHS  |
| S | 1        | 647  | 0.103196 | 0.019801 | 1.306552  | 1.893046  | Q9Z1E4   | Glycogen phosphorylase         | ASVPPSPSLSRHS    |
| S | 1        | 921  | 0.08053  | 0.029731 | 0.950755  | 1.139387  | O70507   | Potassium channel              | PLQPGARSPQAAQPP  |
| S | 1        | 132  | 0.071945 | 0.013842 | -1.333419 | -1.877384 | P51859   | Hepatoma-derived growth factor | KKGSAEGSSDEEGKL  |
| S | 1        | 133  | 0.071945 | 0.013842 | -1.333419 | -1.877384 | P51859   | Hepatoma-derived growth factor | KGSAEGSSDEEGKLV  |
| S | 1        | 231  | 0.755668 | 0.002102 | -0.36775  | -3.33302  | Q3UMU9   | Hepatoma-derived growth factor | KKKVPASDSDSKAD   |
| S | 1        | 233  | 0.764534 | 0.000873 | -0.36775  | -4.125957 | Q3UMU9   | Hepatoma-derived growth factor | KVPASDSDSKADSD   |
| S | 1        | 229  | 0.252094 | 0.04276  | -1.592344 | -2.692455 | Q3UMU9   | Hepatoma-derived growth factor | GRKKKVPASDSDSK   |
| S | 1        | 352  | 0.013477 | 0.253452 | -1.660509 | 0.57784   | Q640R3   | Hepatocyte growth factor       | SPVPGRSPGLPIRS   |
| S | 1        | 301  | 0.376459 | 0.047256 | 1.016511  | -2.088893 | Q640R3   | Hepatocyte growth factor       | EADTLPRSGEQERKN  |
| S | 1        | 7    | 0.438519 | 0.018528 | 0.541618  | 1.593113  | P18608   | Non-histone nuclear protein    | _MPKRKVSADGAAGA  |
| S | 1        | 88   | 0.024995 | 0.013676 | 2.277415  | 2.375736  | Q9CX86   | Heterogeneous nuclear protein  | RAVSRDSARPGAHA   |
| S | 0.999944 | 182  | 0.885884 | 0.046725 | -0.312261 | -2.061497 | Q8R081   | Heterogeneous nuclear protein  | KISRPGDSDSRSVN   |
| S | 1        | 943  | 0.036565 | 0.001715 | -1.923581 | -3.588083 | Q8CDA1   | Phosphatidylinositol           | SPLKKSPSADSIHTR  |
| S | 0.999998 | 946  | 0.013705 | 0.001399 | -1.303391 | -1.966521 | Q8CDA1   | Phosphatidylinositol           | KKSPSADSIHTRTGF  |
| S | 1        | 132  | 0.031411 | 0.014188 | 1.082605  | 1.18975   | Q3TES0   | Inositol                       | SRVQTPQSPHQHPVA  |
| T | 1        | 517  | 0.137318 | 0.006012 | 0.624992  | 1.341081  | P81122   | Insulin receptor               | FSSHRNTPESIAET   |
| S | 1        | 185  | 0.863105 | 0.011336 | -0.28217  | -2.442892 | Q8C1D8   | Protein tyrosine kinase        | PKPRISDSESEELPK  |
| S | 1        | 187  | 0.694962 | 0.009423 | 0.354377  | -1.975764 | Q8C1D8   | Protein tyrosine kinase        | PRISDSESEELPKPR  |
| S | 1        | 70   | 0.902427 | 0.047135 | -0.450537 | -3.232325 | Q8BNW9   | Kelch repeat domain            | AAEGSEASPPKLRSD  |
| S | 0.992395 | 434  | 0.024825 | 0.014897 | 0.752438  | 0.767056  | P63141   | Potassium channel              | QYLQVTSCKPIPSS   |
| S | 1        | 447  | 0.195197 | 0.011877 | -0.933495 | -1.962971 | P63141   | Potassium channel              | SSPDLKRSRSTIS    |
| T | 1        | 452  | 0.15095  | 0.013269 | -1.180504 | -2.174184 | P63141   | Potassium channel              | KKRSRSTISKSDYM   |
| S | 1        | 552  | 0.342591 | 0.015383 | 0.857661  | 2.245143  | Q9Z0V2   | Potassium channel              | VSGSHRGVQELSTI   |
| S | 1        | 546  | 0.341489 | 0.004958 | 0.570081  | 1.951582  | Q9Z0V2   | Potassium channel              | RIPNANVSGSHRGVSV |
| S | 1        | 548  | 0.342591 | 0.015383 | 0.857661  | 2.245143  | Q9Z0V2   | Potassium channel              | PNANVSGSHRGVQVE  |
| S | 1        | 938  | 0.217143 | 0.034518 | 0.836207  | 1.399402  | Q08460   | Calcium channel                | HGMLRQPSITGVNI   |
| S | 0.935653 | 200  | 0.170043 | 0.033437 | 2.766654  | 4.204835  | Q6WVG3   | BTB/POZ domain                 | AGLLTPSQSLDGSR   |
| S | 1        | 221  | 0.116776 | 0.042571 | 0.846272  | 1.04171   | Q7TSH8   | Uncharacterized protein        | GDLFPFPSPSPRGR   |
| S | 1        | 225  | 0.116776 | 0.042571 | 0.846272  | 1.04171   | Q7TSH8   | Uncharacterized protein        | PPFPSPSPRGEVVKR  |
| S | 1        | 1301 | 0.005712 | 0.005559 | 3.262328  | 2.936223  | A2AAE1   | Uncharacterized protein        | QDKSVGQSPRLRSLK  |
| S | 1        | 180  | 0.215788 | 0.014467 | 0.431231  | 0.90296   | Q148V7   | LisH domain                    | QQLNRRAGSISTLDSL |
| S | 1        | 180  | 0.967256 | 0.034561 | -0.06329  | 0.879986  | Q148V7   | LisH domain                    | QQLNRRAGSISTLDSL |
| S | 1        | 186  | 0.967256 | 0.034561 | -0.06329  | 0.879986  | Q148V7   | LisH domain                    | QQLNRRAGSISTLDSL |
| S | 0.999763 | 933  | 0.373503 | 0.020592 | 0.453584  | 1.163049  | Q61768   | Kinesin                        | PGQHPAASPTHGTV   |
| S | 1        | 579  | 0.097791 | 0.043828 | 0.687892  | 0.789349  | Q91YS4   | Kinesin light chain            | SRMKRASSLNFLNKS  |
| S | 0.991117 | 13   | 0.884503 | 0.004691 | -0.240049 | -2.811984 | Q8BGY4   | Kelch-like protein             | GSSGSSQSPERPSSL  |
| S | 1        | 494  | 0.002053 | 0.001269 | 3.179723  | 3.158437  | Q6ZQ58   | La-related protein             | HYQKETESAPGSPRA  |
| T | 0.998112 | 842  | 0.967295 | 0.030114 | -0.123909 | -1.789984 | Q6ZQ58   | La-related protein             | AVGSYGCTPQSLPKF  |
| S | 1        | 169  | 0.229959 | 0.04459  | -0.999134 | -1.597454 | D3YU59   | LIM and LIM domain             | KETDDIDSPKRSIRD  |
| S | 0.988995 | 608  | 0.00051  | 0.000202 | 3.653871  | 3.967516  | Q7TME0   | Lipid phosphate                | STVTCTGSIRYKTLT  |
| S | 0.999996 | 90   | 0.914974 | 0.037271 | -0.250105 | -2.066349 | Q3UZ39-2 | Leucine-rich repeat            | FRRNTSASDEDERLS  |
| S | 0.999538 | 192  | 0.328921 | 0.033108 | 0.369371  | 0.772786  | Q8K2F8   | Protein Lsm                    | QLDPLRKSPTEMQAV  |
| S | 1        | 1052 | 0.002433 | 0.476464 | -2.746345 | -0.434566 | Q9QYR6   | Microtubule                    | PGPEEAMSEEGKVPL  |
| S | 1        | 2230 | 0.948168 | 0.004965 | 0.057206  | 1.015356  | Q9QYR6   | Microtubule                    | RPASPALSEGSSEEA  |
| S | 1        | 1062 | 0.207446 | 0.017739 | 0.384863  | 0.752229  | Q9QYR6   | Microtubule                    | GKVPLSRSPQAQDTL  |
| T | 0.981373 | 2182 | 0.859641 | 0.010836 | 0.130672  | 1.127743  | Q9QYR6   | Microtubule                    | ALALVPGTPRTRHD   |
| S | 0.999999 | 2234 | 0.20144  | 0.016702 | 2.637205  | 5.166222  | Q9QYR6   | Microtubule                    | PALSEGSSSEATTPV  |
| S | 0.997469 | 1139 | 0.854627 | 0.04367  | 0.329578  | 1.937803  | Q9QYR6   | Microtubule                    | FSPEDAESLVLSVV   |
| S | 1        | 541  | 0.544564 | 0.0244   | 1.468889  | -4.825388 | P14873   | Microtubule                    | KLKQRADSRESLKPA  |
| S | 0.98415  | 1851 | 0.138569 | 0.030621 | 1.236205  | 1.775892  | P14873   | Microtubule                    | NRDLTSSVEKDSGG   |
| S | 1        | 1438 | 0.517583 | 0.046674 | 0.434231  | 1.13821   | P14873   | Microtubule                    | QGFPDRESVSDLTS   |
| S | 1        | 1293 | 0.012803 | 0.008878 | 0.857764  | 0.838283  | P14873   | Microtubule                    | EGEARSVSPGVTQAV  |
| S | 1        | 1508 | 0.027049 | 0.005688 | 0.786315  | 1.032674  | P14873   | Microtubule                    | IDVSQFGSKEDTKM   |



|   |          |      |          |          |           |           |          |                            |                   |
|---|----------|------|----------|----------|-----------|-----------|----------|----------------------------|-------------------|
| S | 0.99867  | 1321 | 0.000498 | 0.389678 | -3.458575 | 0.450299  | P14873   | Microtubul Map1b           | EVVSPSQSVTGSAGH   |
| S | 1        | 825  | 0.563305 | 0.035747 | -0.357403 | -1.094977 | P14873   | Microtubul Map1b           | KELEAERSLMSPPED   |
| S | 1        | 828  | 0.563305 | 0.035747 | -0.357403 | -1.094977 | P14873   | Microtubul Map1b           | AERSLMSSPEDLTKD   |
| S | 1        | 829  | 0.563305 | 0.035747 | -0.357403 | -1.094977 | P14873   | Microtubul Map1b           | AERSLMSSPEDLTKD   |
| S | 0.999991 | 1317 | 0.010328 | 0.494871 | -2.228876 | -0.476697 | P14873   | Microtubul Map1b           | EKTLEVVSPSQSVTG   |
| S | 0.99867  | 1321 | 0.567854 | 0.048153 | -2.156493 | -6.120738 | P14873   | Microtubul Map1b           | EVVSPSQSVTGSAGH   |
| S | 0.997711 | 1334 | 0.010593 | 0.18514  | -6.210243 | -2.350404 | P14873   | Microtubul Map1b           | GHTPPYQSPTEKSS    |
| S | 1        | 1161 | 0.264196 | 0.04406  | 0.500877  | 0.859487  | P20357   | Microtubul Map2            | DEGKKETSPETSLIQ   |
| S | 1        | 1743 | 0.010687 | 0.166546 | 0.951919  | 0.377187  | P20357   | Microtubul Map2            | KAQAKVGLSNDNAHHV  |
| T | 0.999458 | 1260 | 0.937532 | 0.019967 | -0.109177 | 1.255646  | P20357   | Microtubul Map2            | KLLFRSDTLQISDLL   |
| S | 0.999945 | 726  | 0.06354  | 0.019372 | 2.644074  | 3.291006  | P20357   | Microtubul Map2            | FGRGHDLSPPLASDIL  |
| S | 0.999395 | 1796 | 0.038963 | 0.910559 | 5.081798  | -0.511992 | P20357   | Microtubul Map2            | VASPRRLSNVSSSGS   |
| S | 1        | 449  | 0.998755 | 0.040337 | 0.021463  | -1.484952 | O08648   | Mitogen-actin Map3k4       | VELRELESGTEESDE   |
| S | 1        | 454  | 0.99868  | 0.044467 | 0.021463  | -1.40249  | O08648   | Mitogen-actin Map3k4       | LESGTEESDEEPTPS   |
| S | 1        | 832  | 0.212182 | 0.008715 | 0.300748  | 0.706916  | Q7TSJ2   | Microtubul Map6            | PEPPKNQSPVVLGPI   |
| S | 0.999961 | 905  | 0.510976 | 0.044632 | 0.983619  | 2.58211   | Q7TSJ2   | Microtubul Map6            | HTEYIEGSP_____    |
| S | 0.995086 | 415  | 0.011352 | 0.016458 | 3.213079  | 2.621642  | Q80W82   | Mitogen-actin Mapk10       | GVVKGQSPSPAQQQQ   |
| S | 1        | 28   | 0.012038 | 0.364833 | -2.691426 | 0.744918  | Q9WV19   | C-Jun-amin Mapk8ip1        | FLGLHIASPPNFRLT   |
| S | 1        | 732  | 0.059209 | 0.039162 | 1.123754  | 1.133789  | Q9ESN9-3 | C-Jun-amin Mapk8ip3        | EPKSTHPSPEKKKAK   |
| S | 1        | 499  | 0.687074 | 0.039168 | -0.282636 | -1.073552 | A2A5Y6   | Microtubul Mapt            | GSGEPPKSGERSGYS   |
| Y | 0.999893 | 702  | 0.163412 | 0.005898 | -1.959212 | -4.51822  | A2A5Y6   | Microtubul Mapt            | DHGAEIVYKSPVVS    |
| S | 0.980171 | 721  | 0.109642 | 0.014866 | -0.851163 | -1.354247 | A2A5Y6   | Microtubul Mapt            | RHLSNVSTGSIDMV    |
| S | 1        | 163  | 0.095373 | 0.001631 | 0.49843   | 1.258437  | P26645   | Myristoylat Marcks         | SFKLSGFSFKKSKKE   |
| S | 1        | 104  | 0.96532  | 0.016872 | 0.060688  | 0.989463  | P28667   | MARCKS-related Marcks1     | PFKLSGLSFKRNRKE   |
| S | 1        | 468  | 0.093145 | 0.024862 | 0.763823  | 1.007296  | Q8VHJ5   | Serine/threonine Mark1     | LGSTTVGSKSEVTAS   |
| S | 1        | 412  | 0.0465   | 0.561725 | -2.331929 | 0.657847  | Q8VHJ5   | Serine/threonine Mark1     | AHLKVQRISANQKQ    |
| T | 1        | 208  | 0.021366 | 0.000437 | 0.436241  | 0.94379   | Q05512   | Serine/threonine Mark2;Mar | TFGNKLDTCFGSPPY   |
| S | 1        | 598  | 0.016387 | 0.009519 | 2.819915  | 2.881837  | Q8K310   | Matrin-3 Matr3             | KSRKRSYSPDKESP    |
| S | 1        | 131  | 0.06619  | 0.003708 | 2.691135  | 5.033554  | Q6PCP5   | Mitochond Mff              | LKRERSMSENAVRQN   |
| T | 1        | 1653 | 0.106109 | 0.019754 | 1.026656  | 1.502853  | Q8CJ19   | Protein-me Mical3          | LRGTQEPTLKHEATS   |
| S | 1        | 1450 | 0.069109 | 0.01445  | 1.236472  | 1.700796  | Q99104   | Unconvent Myo5a            | VGQMENISPGQIIDE   |
| S | 0.999983 | 946  | 0.501494 | 0.008454 | -0.247441 | 0.982093  | P13595   | Neural cell Ncam1          | APPASKASPAPTPTP   |
| T | 1        | 788  | 0.022402 | 0.026431 | 3.948915  | 3.381644  | P13595   | Neural cell Ncam1          | VRTEEERTPNHDGGK   |
| S | 0.999983 | 946  | 0.591991 | 0.001581 | 0.219037  | 1.491486  | P13595   | Neural cell Ncam1          | APPASKASPAPTPTP   |
| T | 0.681346 | 21   | 0.022985 | 0.069028 | -1.964243 | -1.286155 | Q3UYV9   | Nuclear caj Ncbp1          | QPHKRRKTS DANETE  |
| S | 0.998686 | 472  | 0.680332 | 0.037111 | 0.402586  | 1.530262  | Q6DFV7   | Nuclear ree Ncoa7          | QEVMPGESDTELKGA   |
| S | 0.99998  | 231  | 0.485732 | 0.00192  | -0.374298 | -2.025466 | Q9ERR1   | Nuclear dis Ndel1          | GTENSFSPKAIPNG    |
| S | 0.748925 | 346  | 0.001723 | 0.00318  | -5.095398 | -3.980239 | Q9QYGO   | Protein ND Ndr2            | IDGSRSRRTLSQSS    |
| S | 0.999706 | 350  | 0.385935 | 0.017882 | -1.959478 | -5.32074  | Q9QYGO   | Protein ND Ndr2            | RSRRTLSQSSSESGT   |
| S | 1        | 332  | 0.419636 | 0.048685 | -0.484694 | -1.062479 | Q9QYGO   | Protein ND Ndr2            | LSRSTASLTSASAI    |
| S | 0.999998 | 476  | 0.946936 | 0.024327 | 0.089423  | -1.064316 | E9PXB7   | E3 ubiquitin Nedd4l        | RAVKDTLNSNPQSPQP  |
| S | 0.999917 | 488  | 0.872332 | 0.038411 | 0.155015  | -1.016827 | E9PXB7   | E3 ubiquitin Nedd4l        | PQSPSPYNSPKPQHVKV |
| S | 1        | 745  | 0.001369 | 0.622107 | -6.680839 | -0.718833 | P19246   | Neurofilam Nefh            | KSPGEAKSPGEAKSP   |
| T | 1        | 586  | 0.918949 | 0.023737 | 0.198563  | -1.901446 | P19246   | Neurofilam Nefh            | AEPKSPATVKSPGEA   |
| S | 1        | 605  | 0.097873 | 0.026399 | 0.768475  | 1.014295  | P08553   | Neurofilam Nefm            | EKPEKAKSPMPKSPV   |
| S | 1        | 904  | 0.943865 | 0.047893 | -0.146257 | -1.402117 | Q5NCX5   | Neuralized Neurl4          | SNTATEKSFPLHSPV   |
| S | 1        | 909  | 0.943865 | 0.047893 | -0.146257 | -1.402117 | Q5NCX5   | Neuralized Neurl4          | EKSFPLHSPVAGVAH   |
| S | 1        | 79   | 0.81514  | 0.023624 | -0.24607  | -1.489647 | O09130   | NFATC2-int Nfatc2ip        | PAKPEQDSDSDSEGA   |
| S | 1        | 81   | 0.81514  | 0.023624 | -0.24607  | -1.489647 | O09130   | NFATC2-int Nfatc2ip        | KPEQDSDSDSEGAEE   |
| S | 1        | 83   | 0.81514  | 0.023624 | -0.24607  | -1.489647 | O09130   | NFATC2-int Nfatc2ip        | EQDSDSDSEGAEEGP   |
| S | 0.999972 | 304  | 0.20245  | 0.042384 | -0.944321 | -1.446018 | Q91VE6   | MKI67 FHA Nifk             | QKTPTSASPGGKRPR   |
| S | 1        | 891  | 0.06802  | 0.029903 | -1.175828 | -1.33349  | F8WGF2   | Nitric oxide Nos1          | SYSDSRKSSGDGPD    |
| S | 1        | 243  | 0.034839 | 0.296156 | -3.906597 | -1.606402 | Q64322   | Neural pro Npdc1           | SPSTPRISPDQRLA    |
| S | 1        | 19   | 0.83638  | 0.047637 | 0.149918  | 0.803406  | Q80XU3   | Nuclear ub Nucks1          | DYSQFQESDDADEDY   |
| S | 0.996682 | 726  | 0.025584 | 0.032346 | 1.066341  | 0.895486  | Q6PFX7   | Neuronal t Nyap1           | YRLGRSASTSGVRQA   |
| S | 0.998948 | 15   | 0.888859 | 0.042481 | 0.112192  | 0.772363  | Q4KMM3   | Oxidation r Oxr1           | WLKKSQSVDITAPG    |
| S | 1        | 361  | 0.023741 | 0.345201 | 0.886546  | 0.30138   | Q9DCE5   | p21-activat Pak1ip1        | KQPTKGNSPVTAKKR   |
| S | 1        | 247  | 0.035762 | 0.128992 | -1.900997 | -1.134618 | Q3ULB5   | Serine/threonine Pak6      | GRPGGEGSPSPKNQE   |
| S | 0.950201 | 161  | 0.297312 | 0.048925 | 1.067687  | 1.89036   | Q9ZOP4-2 | Paralemmi Palm             | PVRSPGGSTMMKAVV   |
| S | 0.989919 | 164  | 0.123388 | 0.01283  | 0.637544  | 1.097412  | Q3TV18   | Pre-B-cell li Pbxip1       | RRRGREPPSSQPVPV   |
| S | 1        | 173  | 0.39146  | 0.040269 | 0.396793  | 0.875699  | P60335   | Poly(rC)-bii Pcbp1         | MLETLSQSPQGRVMT   |

|   |          |      |          |          |           |           |           |                      |                   |
|---|----------|------|----------|----------|-----------|-----------|-----------|----------------------|-------------------|
| S | 1        | 1185 | 0.087568 | 0.035895 | 1.416071  | 1.656529  | E9Q2S0    | Pcdh7                | MPVDERGSQEKLANG   |
| S | 0.999872 | 1292 | 0.163081 | 0.024    | 0.552083  | 0.90178   | Q9QYX7    | Protein pic Pclo     | SSSQPKSPQGLSDT    |
| T | 0.997663 | 1552 | 0.002619 | 0.941892 | -3.411151 | 0.1413    | Q9QYX7    | Protein pic Pclo     | RLTRKSTSFDDDDAG   |
| S | 0.991809 | 50   | 0.02407  | 0.132722 | 1.477899  | 0.784418  | Q8VBU5    | Pde4b                | PKISPRSSPRNSPCF   |
| S | 1        | 119  | 0.847936 | 0.015811 | -0.57321  | -4.306899 | Q8CI51-3  | PDZ and LII Pdlim5   | AEGQRRGSQGDIIKQQ  |
| S | 1        | 228  | 0.84461  | 0.011781 | -0.57321  | -4.574997 | Q8CI51    | PDZ and LII Pdlim5   | AEGQRRGSQGDIIKQQ  |
| S | 1        | 125  | 0.039346 | 0.004768 | 1.785973  | 2.706643  | Q3UWL8    | Prefoldin s1 Pfdn4   | QLYAKFGSNINLEAD   |
| S | 0.999999 | 522  | 0.853    | 0.014378 | -0.157103 | -1.232288 | Q6PDH0    | Pleckstrin f Phldb1  | GRRTRSPSPTLGESL   |
| S | 0.999991 | 5    | 0.902416 | 1.5E-06  | -0.059575 | -4.085484 | Q2TBE6    | Phosphatic Pi4k2a    | ___MDETSPLVSPER   |
| S | 0.999968 | 23   | 0.148143 | 0.038446 | 1.10828   | 1.534033  | Q9Z1T6    | 1-phosphai Pikfyve   | DLPRSPASPSHLTHF   |
| S | 0.999557 | 1713 | 0.004226 | 0.001483 | 0.639099  | 0.721067  | Q9Z1T6    | 1-phosphai Pikfyve   | DNRPKSSSPIRLPEI   |
| S | 0.998409 | 4274 | 5.88E-05 | 0.921317 | -6.207673 | 0.135563  | Q9QXS1-6  | Plectin Plec         | GFRSRSSSVGSSSSSY  |
| S | 0.999488 | 1020 | 0.876158 | 0.039768 | 0.111758  | 0.738366  | E9Q6H8    | Plekha5              | GVPLRTKSPTPESS    |
| S | 0.9826   | 868  | 0.014898 | 0.014701 | -1.772784 | -1.590915 | Q3UIL6    | Pleckstrin f Plekha7 | LQPSPPTSPVRTPLE   |
| S | 1        | 242  | 0.605394 | 0.032899 | 0.411558  | 1.393533  | Q35621    | Phosphom: Pmm1       | TVGHSVSPQDVTVQR   |
| S | 0.999999 | 33   | 0.037678 | 0.078132 | -0.862198 | 0.620277  | Q8R450    | Protein ph: Ppp1r14c | PRGGTGGSPGSSSSS   |
| T | 1        | 497  | 0.040476 | 0.004575 | 0.486564  | 0.750329  | Q4VA93    | Protein kin Prkca    | MDGVVTRTFCGTPDY   |
| T | 1        | NaN  | 0.040476 | 0.004575 | 0.486564  | 0.750329  |           | Protein kin Prkcb    | WDGVVTKTFCGTPDY   |
| T | 1        | 514  | 0.040476 | 0.004575 | 0.486564  | 0.750329  | P63318    | Protein kin Prkcg    | FPGSTTRTFCGTPDY   |
| S | 1        | 303  | 0.974241 | 0.043946 | -0.130582 | -1.918993 | Q02111    | Protein kin Prkcg    | ESTQQARSLRDESEHI  |
| T | 0.957752 | 609  | 0.194504 | 0.039314 | 0.564368  | 0.867545  | Q7TSC1    | Protein PRI Prcc2a   | EEVPPPTTTPAPKME   |
| S | 1        | 845  | 0.951886 | 0.029589 | 0.075873  | 0.902059  | Q6PE13    | Proline-rich Prrt3   | ALRPRRGSQPDAELD   |
| S | 0.999984 | 832  | 0.047734 | 0.130798 | -3.222549 | -2.076916 | Q6PE13    | Proline-rich Prrt3   | CGLRGLASSPTGGAL   |
| S | 1        | 791  | 0.229201 | 0.043575 | -0.450517 | -0.72396  | Q6PE13    | Proline-rich Prrt3   | VGPAPSLSELDLRPP   |
| S | 1        | 342  | 0.000111 | 0.906323 | -4.348246 | -0.118879 | E9PUC5    | PH and SEC Psd3      | KKSHSSPSLNPDASP   |
| T | 1        | 253  | 0.017211 | 0.912545 | -1.215225 | -0.097353 | Q35226    | 26S protea Psmd4     | AGIATPGTEDSDDAL   |
| S | 1        | 748  | 0.038055 | 0.154869 | 2.632819  | 1.491263  | P35831    | Tyrosine-pi Ptpn12   | KKDQITKSPAENVTDI  |
| S | 0.999804 | 176  | 0.052019 | 0.007342 | -0.753489 | -1.119645 | P18052    | Receptor-t: Ptpna    | KKYKQAGSHSPVSVFRL |
| S | 0.999997 | 159  | 0.828785 | 0.007354 | -0.177805 | -1.502174 | Q8R4E6    | Purine-rich Purg     | RQKHSAPSPVSVVGS   |
| S | 1        | 163  | 0.828785 | 0.007354 | -0.177805 | -1.502174 | Q8R4E6    | Purine-rich Purg     | SAPSPVSVGSEEHHP   |
| S | 1        | 166  | 0.828785 | 0.007354 | -0.177805 | -1.502174 | Q8R4E6    | Purine-rich Purg     | SPPVSVGSEEHPHSV   |
| S | 0.999959 | 515  | 0.020991 | 0.015111 | -0.965974 | -0.939191 | Q8R361    | Rab11 fam Rab11fip5  | KEPTQKPSHPVKPL    |
| S | 1        | 480  | 0.617637 | 0.007536 | -0.450111 | -2.26131  | Q5U3K5    | Rab-like pr Rabl6    | PMPKSNISLSSEEEA   |
| S | 1        | 482  | 0.617637 | 0.007536 | -0.450111 | -2.26131  | Q5U3K5    | Rab-like pr Rabl6    | PSKNISLSSEEEAEG   |
| S | 1        | 483  | 0.617637 | 0.007536 | -0.450111 | -2.26131  | Q5U3K5    | Rab-like pr Rabl6    | SKNISLSSEEEAEG    |
| S | 1        | 2729 | 0.962458 | 0.031854 | 0.316719  | 4.197201  | Q9ERU9    | E3 SUMO-f Ranbp2     | GGEDEDGSDDEDVVHN  |
| S | 0.999997 | 788  | 0.067041 | 0.016921 | -1.211602 | -1.586889 | Q9ERU9    | E3 SUMO-f Ranbp2     | SPTKYLSLSPSKSYKY  |
| S | 0.990471 | 1119 | 0.984053 | 0.014171 | 0.1681    | -4.255206 | Q8CHG7    | Rap guanin Rapgef2   | QLSSPPTSPQSSPRK   |
| S | 0.992155 | 133  | 0.442156 | 0.039572 | 0.305416  | 0.737987  | E9PW37    | Rasal2               | RCLRRTVSPVSEGGQF  |
| S | 1        | 646  | 0.036212 | 0.247475 | -2.555354 | -1.164206 | Q9ESK9    | RB1-inducii Rb1cc1   | KVSTSQASPSAASP    |
| S | 1        | 42   | 0.57563  | 0.008903 | -0.203669 | 0.909684  | A0A023T67 | RNA-bindir RBM8      | RKGRGSGSEEGSRAR   |
| S | 0.999997 | 451  | 0.039001 | 0.099915 | -2.621108 | -1.754951 | Q8CFE3    | REST corep Rcor1     | ANQKPKVKSPESSIKI  |
| S | 0.999999 | 561  | 0.150502 | 0.018051 | 1.329664  | 2.264701  | O54916    | RalBP1-ass Repr1     | PSHSRSSSLDMNRTF   |
| S | 1        | 675  | 0.026467 | 0.599235 | 1.179071  | -0.265739 | Q80T29    | Arginine-gl Rere     | KTKTQEISRPNPSE    |
| S | 0.999989 | 679  | 0.048567 | 0.377931 | 1.129643  | -0.442174 | Q80T29    | Arginine-gl Rere     | QEISRPNPSEGE      |
| S | 1        | 271  | 0.044083 | 0.011515 | 0.902197  | 1.14724   | P47708    | Rabphilin-3 Rph3a    | AGLRRANSVQAARPA   |
| S | 0.999034 | 240  | 0.69339  | 0.008517 | -0.11674  | -1.00721  | P62754    | 40S ribosoi Rps6     | RLSSLRASTKSSESS   |
| S | 0.99962  | 244  | 0.69339  | 0.008517 | -0.11674  | -1.00721  | P62754    | 40S ribosoi Rps6     | LRASTKSSESSQ_     |
| S | 1        | 434  | 0.113187 | 0.024143 | -0.576795 | -0.819845 | P56183    | Ribosomal Rrp1       | PQNKEAGSEAESSSA   |
| S | 0.999651 | 217  | 0.188099 | 0.011292 | 0.469607  | 0.983974  | Q9ES97    | Reticulon-3 Rtn3     | HICTYLSLSPSELVA   |
| S | 1        | 145  | 0.969412 | 0.021149 | 0.048328  | 0.793303  | Q99P72    | Reticulon-4 Rtn4     | PPAPAGASPLAEPAA   |
| S | 0.999932 | 839  | 0.089501 | 0.026668 | -4.065129 | -5.19254  | Q99P72    | Reticulon-4 Rtn4     | SETFSDSPIEIIIDE   |
| T | 0.999886 | 568  | 0.905879 | 0.023558 | -0.093099 | -0.824194 | Q61909    | Protein CBI Runx1t1  | PRSTTPGTPTTIETT   |
| S | 1        | 20   | 0.033877 | 0.885888 | -3.37514  | -0.373527 | Q6ZPE2    | Myotubula Sbf1       | FGPHPRGSGEGGQGI   |
| S | 0.999983 | 532  | 0.618723 | 0.002286 | 0.188766  | 1.246579  | Q03517    | Secretogra Scg2      | KRVSPVSSSEDDLQE   |
| S | 1        | 141  | 0.051935 | 0.019886 | 1.76949   | 2.058841  | P12961    | Neuroendc Scg5       | APDTAEFSREFQLDQ   |
| S | 1        | 137  | 0.883993 | 0.00681  | -0.393058 | -4.213781 | O08547    | Vesicle-traf Sec22b  | RARRNLGSIINTELQD  |
| S | 0.999998 | 735  | 0.026823 | 0.222889 | 2.874669  | 1.268205  | G3X928    | SEC23-inte Sec23ip   | PKTKEMASPSSESNE   |
| S | 1        | 28   | 0.398266 | 0.011534 | -0.28499  | -0.881231 | P28661    | Septin-4 Sept4       | IKHFLEDSDDAELS    |
| S | 1        | 29   | 0.398266 | 0.011534 | -0.28499  | -0.881231 | P28661    | Septin-4 Sept4       | KHFLEDSDDAELSK    |
| S | 1        | 287  | 1.07E-08 | 0.032423 | 7.473548  | 0.288583  | Q8VD37-8  | SH3-contai Sgip1     | AKIEKLPSISDLDSI   |

|   |          |      |          |          |           |           |          |               |          |                  |
|---|----------|------|----------|----------|-----------|-----------|----------|---------------|----------|------------------|
| S | 1        | 300  | 1.07E-08 | 0.032423 | 7.473548  | 0.288583  | Q8VD37-8 | SH3-contai    | Sgip1    | SIFGPVLPKSVAVN   |
| S | 0.999699 | 633  | 0.01484  | 0.020999 | 1.122447  | 0.919307  | Q8BPQ7   | Small G prc   | Sgsm1    | AKCSSGASLDLHLHR  |
| T | 0.999824 | 647  | 0.046262 | 0.099267 | 1.302444  | 0.917567  | Q8BPQ7   | Small G prc   | Sgsm1    | RMLHRDSTISNESSQ  |
| S | 0.999389 | 1094 | 0.283523 | 0.021681 | 0.447969  | 0.966686  | D3Z5K8   | SH3 and m     | Shank2   | RNSPAFLSTDLGDED  |
| S | 1        | 533  | 0.024376 | 0.040479 | -0.743234 | -0.578994 | Q6P4S6   | Serine/thre   | Sik3     | VTPVDEESSDGEPDQ  |
| S | 1        | 534  | 0.024376 | 0.040479 | -0.743234 | -0.578994 | Q6P4S6   | Serine/thre   | Sik3     | TPVDEESSDGEPDQE  |
| S | 1        | 1249 | 0.359962 | 0.046809 | 0.382759  | 0.76672   | Q8C0T5   | Signal-indu   | Sipa111  | QDPVVHLSPNKQGH5  |
| S | 0.998212 | 1905 | 0.013326 | 0.10387  | -2.5577   | -1.275462 | A2AQ25   | Sickle tail p | Skt;Etl4 | SSPPSPASPTSLNQG  |
| S | 1        | 1044 | 0.986882 | 0.02703  | -0.048653 | -1.151783 | Q91V14   | Solute carr   | Slc12a5  | AEKNKGPSPVSSSEGI |
| S | 1        | 1047 | 0.986882 | 0.02703  | -0.048653 | -1.151783 | Q91V14   | Solute carr   | Slc12a5  | NKGPSPVSSSEGIKDF |
| S | 1        | 1048 | 0.986882 | 0.02703  | -0.048653 | -1.151783 | Q91V14   | Solute carr   | Slc12a5  | KGPPSPVSSSEGIKDF |
| S | 0.996488 | 548  | 0.046583 | 0.202452 | -1.979494 | -1.062594 | Q9Z0E8   | Solute carr   | Slc22a5  | MQKDGEEESPVLKST  |
| S | 0.996307 | 297  | 0.417468 | 0.030753 | 0.502984  | 1.24989   | Q8CGA3   | Large neuti   | Slc43a2  | EGHKLCSTVDLEVK   |
| S | 0.9996   | 297  | 0.012913 | 0.030779 | 0.861777  | 0.61631   | Q5DTL9   | Sodium-dri    | Slc4a10  | GQQKQHTSPCGMKQR  |
| S | 1        | 600  | 0.129539 | 0.047244 | -0.70392  | -0.873254 | P28571-1 | Sodium- ar    | Slc6a9   | YAPTTTTSPEDGFEV  |
| T | 0.806717 | 597  | 0.129539 | 0.047244 | -0.70392  | -0.873254 | P28571-1 | Sodium- ar    | Slc6a9   | TGRYAPTTPPEDG    |
| T | 0.997075 | 598  | 0.129539 | 0.047244 | -0.70392  | -0.873254 | P28571-1 | Sodium- ar    | Slc6a9   | GRYAPTTPPEDGF    |
| T | 0.872036 | 607  | 0.037168 | 0.021293 | 1.618544  | 1.681055  | Q61165   | Sodium/hy     | Slc9a1   | KIPSAVSTVSMQNIH  |
| S | 1        | 117  | 0.996603 | 0.043938 | -0.021403 | -0.874207 | P70441   | Na(+)/H(+)    | Slc9a3r1 | LLRPQEKSEQAEP    |
| S | 1        | 465  | 0.351784 | 0.010683 | -0.469106 | -1.364807 | Q3URD3   | Sarcolemm     | Slmap    | KAKESDLSDTLSPSK  |
| S | 1        | 469  | 0.351784 | 0.010683 | -0.469106 | -1.364807 | Q3URD3   | Sarcolemm     | Slmap    | SDLSDTLSPSKEKSS  |
| T | 0.999998 | 467  | 0.351784 | 0.010683 | -0.469106 | -1.364807 | Q3URD3   | Sarcolemm     | Slmap    | KESDLSDTLSPSKEK  |
| S | 0.999996 | 999  | 0.125516 | 0.021415 | 0.794074  | 1.208753  | Q8CH25   | SAFB-like ti  | Sltm     | TQHSSTASPVNRRVQ  |
| T | 0.998003 | 315  | 0.913464 | 0.000331 | -0.235345 | -5.733885 | E9Q9A3   |               | Snap91   | TVTSPNTPAKTIDT   |
| T | 0.998003 | 317  | 0.761679 | 3.18E-05 | -0.235345 | -5.209688 | Q61548   | Clathrin co   | Snap91   | TVTSPNTPAKTIDT   |
| S | 1        | 204  | 0.112368 | 0.011922 | 2.841628  | 4.815623  | Q80U23   | Syntaphilin   | Snph     | TGESAGGSPARSLTR  |
| S | 0.982977 | 49   | 0.762828 | 0.012765 | 0.124158  | 0.755819  | Q80U23   | Syntaphilin   | Snph     | SCKGSDSSPTPRRSM  |
| S | 1        | 97   | 0.158499 | 0.009753 | 0.358143  | 0.72468   | Q9CWX8   | Sorting nex   | Snx2     | LILSEPSAPVTSMV   |
| S | 1        | 745  | 0.046091 | 0.354602 | 2.331155  | 0.935459  | Q3UTJ2-2 | Sorbin and    | Sorbs2   | LCPKRFRSIESLLEE  |
| S | 1        | 748  | 0.046091 | 0.354602 | 2.331155  | 0.935459  | Q3UTJ2-2 | Sorbin and    | Sorbs2   | KRRFSIESLLEEETQ  |
| S | 0.999998 | 1120 | 0.875058 | 0.016301 | 0.219976  | -1.832231 | Q62245   | Son of seve   | Sos1     | PFHSRSASVSSISLS  |
| S | 1        | 565  | 0.168292 | 0.00994  | 0.454612  | -0.938004 | D3YTL8   | Protein spi   | Spire1   | RFSTKRSVDKSDDEE  |
| S | 1        | 563  | 0.582765 | 0.02743  | -0.314033 | -1.071047 | D3YTL8   | Protein spi   | Spire1   | IARFSTKRSVDKSD   |
| S | 1        | 565  | 0.582765 | 0.02743  | -0.314033 | -1.071047 | D3YTL8   | Protein spi   | Spire1   | RFSTKRSVDKSDDEE  |
| S | 1        | 569  | 0.582765 | 0.02743  | -0.314033 | -1.071047 | D3YTL8   | Protein spi   | Spire1   | KRSVDKSDDELQFP   |
| S | 1        | 2162 | 0.004966 | 0.130862 | -1.119149 | -0.40651  | Q3UGX2   |               | Sptb     | KVLDLTPSEGDEPTT  |
| T | 1        | 2159 | 0.046797 | 0.701104 | -1.891525 | -0.40651  | Q3UGX2   |               | Sptb     | PLFKVLDLTPSEGDE  |
| S | 0.991008 | 2339 | 0.357539 | 0.017548 | 0.337139  | 0.876193  | Q62261   | Spectrin be   | Sptbn1   | VVTITSESSPGKREK  |
| S | 0.999696 | 2340 | 0.196545 | 0.004205 | 0.295451  | 0.795277  | Q62261   | Spectrin be   | Sptbn1   | VVTITSESSPGKREK  |
| T | 0.999999 | 2319 | 0.040994 | 0.669958 | -1.701303 | 0.376327  | Q62261   | Spectrin be   | Sptbn1   | TSASTQSTPASRAQ   |
| S | 0.999999 | 546  | 0.05173  | 0.004674 | -0.529091 | -0.871503 | B1AQX9   |               | Srcin1   | RQSFRRKDSGSSVFA  |
| S | 1        | 555  | 0.05173  | 0.004674 | -0.529091 | -0.871503 | B1AQX9   |               | Srcin1   | SSSVFAESPGGKARS  |
| S | 1        | 858  | 0.881874 | 0.040234 | -0.230001 | -1.554826 | Q812A2   | SLIT-ROBO     | Srgap3   | MGRVRLRSDGAAIPR  |
| S | 1        | 919  | 0.248019 | 0.026164 | 0.628653  | 1.206971  | Q812A2   | SLIT-ROBO     | Srgap3   | RRMATFGSAGSINYP  |
| S | 1        | 868  | 0.998547 | 0.020414 | -0.023242 | -1.788076 | Q812A2   | SLIT-ROBO     | Srgap3   | AAIPRRRSGGDTHSP  |
| S | 0.973273 | 1007 | 0.063492 | 0.009375 | 0.720467  | 1.072723  | Q812A2   | SLIT-ROBO     | Srgap3   | NPPGPISSEPASPLH  |
| S | 0.999999 | 487  | 0.986666 | 0.001599 | 0.016372  | -0.749704 | O54781   | SRSF prote    | Srpk2    | HDRSRTVSASSTGDL  |
| S | 0.995436 | 490  | 0.986666 | 0.001599 | 0.016372  | -0.749704 | O54781   | SRSF prote    | Srpk2    | SRTVSASSTGDLPKT  |
| S | 1        | 387  | 0.58295  | 0.023595 | -0.424391 | -1.506797 | E9PUK6   | Serine/argi   | Srrm1    | PRKTRRLSPSASPPR  |
| S | 1        | 389  | 0.58295  | 0.023595 | -0.424391 | -1.506797 | E9PUK6   | Serine/argi   | Srrm1    | KTRRLSPSASPPRRR  |
| S | 1        | 391  | 0.58295  | 0.023595 | -0.424391 | -1.506797 | E9PUK6   | Serine/argi   | Srrm1    | RRLSPSASPPRRRHR  |
| S | 0.999999 | 2404 | 0.132163 | 0.024231 | 0.619485  | 0.930625  | Q8BTI8   | Serine/argi   | Srrm2    | PAQDRPRSPVPSAFS  |
| S | 1        | 1097 | 0.042947 | 0.529392 | -1.994173 | -0.582171 | Q8BTI8   | Serine/argi   | Srrm2    | PKLKSMSPEQSKTK   |
| S | 1        | 1849 | 0.468473 | 0.003378 | -0.752387 | -3.487945 | Q8BTI8   | Serine/argi   | Srrm2    | RRSRRTSPVSRRRS   |
| S | 1        | 349  | 0.069624 | 0.000455 | -0.353475 | -1.058691 | Q8BTI8   | Serine/argi   | Srrm2    | EKSAVRPSPSPERS   |
| S | 1        | 351  | 0.069624 | 0.000455 | -0.353475 | -1.058691 | Q8BTI8   | Serine/argi   | Srrm2    | SAVRPSPSPERSSTG  |
| S | 1        | 2644 | 0.627467 | 0.029261 | -0.756146 | -2.756696 | Q8BTI8   | Serine/argi   | Srrm2    | DSLDRSRLSYSPVE   |
| S | 1        | 2646 | 0.627467 | 0.029261 | -0.756146 | -2.756696 | Q8BTI8   | Serine/argi   | Srrm2    | LRDSRSLSYSPVERR  |
| S | 1        | 2648 | 0.627467 | 0.029261 | -0.756146 | -2.756696 | Q8BTI8   | Serine/argi   | Srrm2    | DSRSLSYSPVERRQP  |
| S | 1        | 2019 | 0.987698 | 0.027094 | 0.045039  | -1.100719 | Q8BTI8   | Serine/argi   | Srrm2    | RAARGKRLSLTRPPA  |
| S | 1        | 2023 | 0.987698 | 0.027094 | 0.045039  | -1.100719 | Q8BTI8   | Serine/argi   | Srrm2    | GKRLSLTRSPAIRRR  |

|   |          |      |          |          |           |           |        |                        |                  |
|---|----------|------|----------|----------|-----------|-----------|--------|------------------------|------------------|
| S | 1        | 433  | 0.886738 | 0.02712  | -0.228605 | -1.762379 | Q8BTI8 | Serine/argi Srrm2      | TKGSRHASSSPESLK  |
| S | 1        | 434  | 0.879325 | 0.024433 | -0.239487 | -1.832664 | Q8BTI8 | Serine/argi Srrm2      | KGSRHASSSPESLKP  |
| S | 1        | 435  | 0.87085  | 0.026834 | -0.247862 | -1.781636 | Q8BTI8 | Serine/argi Srrm2      | GSRHASSSPESLKPT  |
| S | 1        | 438  | 0.550068 | 0.020482 | -0.821976 | -2.853804 | Q8BTI8 | Serine/argi Srrm2      | HASSSPESLKPTPAP  |
| T | 1        | 2021 | 0.987698 | 0.027094 | 0.045039  | -1.100719 | Q8BTI8 | Serine/argi Srrm2      | ARGKRSLTRSPPAIR  |
| S | 1        | 738  | 0.19466  | 0.006086 | 0.824614  | 2.030467  | Q922B9 | Sperm-spe: Ssfa2       | YPLRRSQSLPTLLS   |
| S | 1        | 383  | 0.047974 | 0.757173 | 0.959407  | 0.181753  | Q9Z1W9 | STE20/SPS: Stk39       | VRRVPGSSGHLHKTE  |
| S | 0.999934 | 328  | 0.036537 | 0.179094 | -3.868768 | -2.04282  | Q8C9H6 | Striatin-int: Strip2   | VKSMRAASPPSYTLD  |
| S | 1        | 339  | 0.036978 | 0.179778 | -4.551043 | -2.407294 | Q8C9H6 | Striatin-int: Strip2   | YTLDLGESQLAPPPS  |
| S | 0.999653 | 782  | 0.523938 | 0.013654 | -1.056709 | -3.881923 | Q8K400 | Syntaxin-bi Stxbp5     | SFSRSRSSSVTSIDK  |
| S | 0.992883 | 733  | 0.047344 | 0.034204 | 0.980268  | 0.96114   | Q8CH09 | SURP and C Sugg2       | KPCQPQSSPGALGPS  |
| S | 0.999704 | 510  | 0.153367 | 0.047086 | -3.985542 | -5.277621 | O88935 | Synapsin-1 Syn1        | PLPQRLPSPAAPQQ   |
| S | 1        | 427  | 0.337897 | 0.046666 | -0.389659 | -0.751887 | O88935 | Synapsin-1 Syn1        | RQPQRDASPRGRSHS  |
| S | 1        | 426  | 0.017808 | 0.20068  | 0.888394  | 0.369343  | Q64332 | Synapsin-2 Syn2        | LSRTPALSPQRPLTT  |
| T | 1        | 422  | 0.025059 | 0.567785 | 1.121427  | 0.263877  | Q64332 | Synapsin-2 Syn2        | MNQLLSRTPALSPQR  |
| S | 1        | 461  | 0.002743 | 0.096373 | -4.637376 | -1.641812 | Q8JZP2 | Synapsin-3 Syn3        | SPSQRLSPQGGQPQV  |
| S | 0.999498 | 544  | 0.004533 | 0.866269 | -2.432484 | 0.178838  | Q8JZP2 | Synapsin-3 Syn3        | KSQSLTNSLSTSDTS  |
| S | 0.999443 | 205  | 0.023504 | 0.555461 | 0.798449  | 0.188861  | Q9CXF4 | TBC1 dom: Tbc1d15      | QNKSLSQSFENLLDE  |
| S | 1        | 19   | 0.047271 | 0.205072 | -2.453907 | 1.315399  | P24529 | Tyrosine 3- Th         | KGFRRAVSEQDTKQA  |
| S | 0.998026 | 1417 | 0.15765  | 0.009819 | -1.695545 | -3.41796  | B1AZI6 | THO compl Thoc2        | RKIDSHPSHSSSTV   |
| S | 0.999999 | 679  | 0.061736 | 0.020507 | 0.585379  | 0.711713  | Q569Z6 | Thyroid ho Thrap3      | IHRRIDISPSTRFKH  |
| S | 1        | 378  | 0.035198 | 0.108063 | -4.953066 | -3.136538 | Q9Z0U1 | Tight juncti Tjp2      | NIPALNDSDEVEDI   |
| S | 0.998773 | 206  | 0.000768 | 0.028642 | -2.159645 | -0.832663 | Q62441 | Transducin Tle4        | RDSIKSSSVSPASAF  |
| S | 0.999969 | 208  | 0.00008  | 0.018477 | -3.085321 | -0.832663 | Q62441 | Transducin Tle4        | SIKSSSVSPASAFRG  |
| S | 1        | 21   | 0.689912 | 0.03193  | 0.345499  | 1.39722   | Q3UHI4 | Protein TM Tmed8       | SPAARRGSAGGVGDR  |
| S | 0.999999 | 1437 | 0.102703 | 0.037915 | 1.114128  | 1.354536  | P58871 | 182 kDa tai Tnks1bp1   | PSSCLTRSPPGSQS   |
| S | 0.999976 | 462  | 0.045952 | 0.335736 | 1.010494  | 0.418659  | O88746 | Target of N Tom1       | DRLPNLASPSAEGPP  |
| S | 0.999999 | 1460 | 0.047028 | 0.020973 | 1.000233  | 1.115103  | Q64511 | DNA topoi: Top2b       | SNEEDTASVFASFSG  |
| S | 1        | 1509 | 0.366951 | 0.010837 | -0.415823 | -1.237536 | Q64511 | DNA topoi: Top2b       | KIVETINSDSSEFG   |
| S | 1        | 1511 | 0.366951 | 0.010837 | -0.415823 | -1.237536 | Q64511 | DNA topoi: Top2b       | VETINSDSSEFGIP   |
| S | 1        | 1513 | 0.366951 | 0.010837 | -0.415823 | -1.237536 | Q64511 | DNA topoi: Top2b       | TINSDSSEFGIPKK   |
| S | 0.999968 | 140  | 0.015977 | 0.797889 | -0.915349 | -0.115377 | Q921T2 | Torsin-1A-i Tor1aip1   | HSQQPQLSPATSGRG  |
| S | 0.997563 | 697  | 0.827662 | 0.006655 | 0.175929  | 1.51575   | Q8CG79 | Apoptosis-: Tp53bp2;Ti | ERIPRPLSPTKLLPF  |
| S | 0.999989 | 166  | 0.889987 | 0.046436 | 0.12112   | -0.817357 | A2AUD5 | Tpd52l2                | RAHPLSQSFSSYSIR  |
| S | 0.997304 | 168  | 0.564777 | 0.02122  | 0.214893  | -0.758947 | A2AUD5 | Tpd52l2                | HPLSQSFSSYSIRHS  |
| S | 1        | 31   | 1.71E-06 | 0.000001 | 7.589765  | 7.56014   | Q7TQD2 | Tubulin pol Tppp       | ARAAKRLSLESEGAN  |
| S | 1        | 34   | 1.71E-06 | 0.000001 | 7.589765  | 7.56014   | Q7TQD2 | Tubulin pol Tppp       | AKRLSLESEGANEGA  |
| S | 0.968381 | 708  | 0.048706 | 0.019689 | 2.711464  | 3.103892  | Q3TLI0 | Trafficking Trappc10   | MLLRRQESGSSLEPP  |
| S | 1        | 440  | 6.97E-05 | 0.329362 | -4.890488 | -0.46994  | Q9ESN6 | Tripartite n Trim2     | GVKRRVKSPGSGHVK  |
| S | 1        | 443  | 3.89E-05 | 0.409723 | -6.323593 | -0.46994  | Q9ESN6 | Tripartite n Trim2     | RRVKSPGSGHVKQKA  |
| S | 0.999982 | 512  | 0.833633 | 0.007337 | 0.338394  | 1.51029   | Q9EP53 | Hamartin Tsc1          | YRDSLGSQQRKTHSA  |
| S | 0.998021 | 519  | 0.485779 | 0.012437 | -0.200951 | -0.707397 | Q6P5F7 | Protein tw: Ttyh3      | TSQPRPDSSGSGH__  |
| S | 0.96764  | 66   | 0.2765   | 0.02056  | 0.880198  | 1.900669  | E9QMD2 | Ube2ql1                | PGGSGDASPGPGKKG  |
| S | 1        | 36   | 0.159154 | 0.025227 | 0.54227   | 0.86573   | Q99PL6 | UBX domai Ubxn6        | EKTTKGKSPQLALRQ  |
| S | 1        | 668  | 0.083342 | 0.044022 | 0.96663   | 1.050327  | Q7TMI3 | E3 ubiquiti: Uhrf2     | EATKRPPASDDECPGD |
| S | 0.99999  | 1151 | 0.020366 | 0.013538 | 1.057293  | 1.048217  | E9Q6Y8 | Ubiquitin c Usp31      | RSLSREGSRQSLGSD  |
| S | 0.936641 | 796  | 0.034421 | 0.964351 | -2.32391  | -0.139531 | E9Q6Y8 | Ubiquitin c Usp31      | SKQASVTAASSRRT   |
| S | 1        | 751  | 0.018965 | 0.027735 | -0.85043  | -0.688737 | P56399 | Ubiquitin c Usp5       | ALRATNNSLERAVDW  |
| S | 0.997669 | 253  | 0.601617 | 0.013865 | 0.171559  | 0.72183   | Q60932 | Voltage-de Vdac1       | FSAKVNNSLIGLGY   |
| S | 1        | 310  | 0.01993  | 0.017248 | 5.21533   | 4.839778  | Q8R5H6 | Wiskott-Al: Wasf1      | LIENRPQSPAAGRTP  |
| S | 1        | 312  | 0.856589 | 0.039958 | 0.152028  | 0.92381   | Q8CGF6 | WD repeat Wdr47        | ADAYMTRSLNPALDG  |
| T | 1        | 689  | 0.10385  | 0.037322 | 1.86826   | 2.290177  | Q9Z0U0 | Xenotropic Xpr1        | TKVLIEDTDEANT_   |
| S | 1        | 907  | 0.524909 | 0.037858 | -1.159316 | -2.266578 | E9Q784 | Zc3h13                 | KRYRNEGSPKPRQSP  |
| S | 1        | 515  | 0.083592 | 0.008659 | -0.519121 | -0.859377 | Q8BJ05 | Zinc finger Zc3h14     | VQPDKPASPFIIVTL  |
| S | 1        | 336  | 0.529125 | 0.024031 | 0.259026  | 0.831513  | Q62523 | Zyxin Zyx              | QNQNQVRSPGGPGPL  |

# HIPPO

| Amino acid | Localization | Position | nalf_pvalue | U50_pval | log2_nalf_ | log2_U50_ | Protein | Protein nar  | Gene name  | Short sequence window |
|------------|--------------|----------|-------------|----------|------------|-----------|---------|--------------|------------|-----------------------|
| S          |              | 1        | 0.023551    | 0.058599 | 1.071703   | 0.742661  | E9Q3M9  |              | 2010300C0  | APPERDMSPEGDVA        |
| S          |              | 1        | 0.023551    | 0.058599 | 1.071703   | 0.742661  | F7B0R9  |              | 2010300C0  | ____XDMSPPEGDVA       |
| S          |              | 0.99993  | 0.052399    | 0.00265  | 0.625564   | 1.175416  | Q8R2R3  | Alpha- and   | Aagab      | HSEQQEPSPTEARTE       |
| S          |              | 0.959734 | 0.998675    | 0.020111 | 0.034752   | -2.810459 | Q3UHJ0  | AP2-associ   | Aak1       | DSRREQSGSGLGSGS       |
| S          |              | 0.952726 | 0.327731    | 0.018134 | 1.198427   | 2.932335  | Q3UHJ0  | AP2-associ   | Aak1       | KLIEGLKSPDTSLLL       |
| S          |              | 0.986558 | 0.009228    | 0.980719 | -5.667344  | 0.17766   | Q3UHJ0  | AP2-associ   | Aak1       | ATTTSPGSPRTSQQN       |
| S          |              | 0.999944 | 0.031443    | 0.543146 | 1.177062   | -0.307536 | Q8K4G5  | Actin-bindi  | Ablm1      | PGSSIPGSPGHTIYA       |
| T          |              | 0.99853  | 0.006104    | 0.341777 | -3.30833   | 0.810726  | Q8BL65  | Actin-bindi  | Ablm2      | SVSLGHYTPTRSRSQ       |
| S          |              | 0.999999 | 0.257879    | 0.025647 | 2.156517   | 4.242831  | Q7TQI7  | Ankyrin re   | Abtb2      | RRSPTVDSGDIRQAA       |
| S          |              | 1        | 0.004378    | 0.000201 | -0.721857  | -1.2534   | Q5SWU9  | Acetyl-CoA   | Acaca      | FHMRRSSMSGLHLVKQ      |
| S          |              | 1        | 0.012723    | 0.065013 | -2.32527   | -1.335597 | Q9JIX8  | Apoptotic    | Acin1      | LQPEQIVSEETPPP        |
| S          |              | 1        | 0.044405    | 0.011029 | 0.615433   | 0.792484  | Q3V117  | ATP-citrate  | Acly       | PAPSRTASFESRAD        |
| S          |              | 1        | 0.017798    | 0.00459  | 0.763544   | 0.944843  | Q9QYCO  | Alpha-addi   | Add1       | KYKAKRSRSPGTPAGE      |
| T          |              | 1        | 0.096041    | 0.026926 | 0.589589   | 0.76916   | Q9QYCO  | Alpha-addi   | Add1       | AKRSRSPGTPAGEGSG      |
| S          |              | 0.999629 | 0.049322    | 0.245845 | -4.13552   | 2.06406   | Q9QYB8  | Beta-adduc   | Add2       | DKTESVTSGLSPGPEG      |
| T          |              | 0.996084 | 0.054053    | 0.049133 | 2.831837   | 2.605137  | Q9QYB5  | Gamma-add    | Add3       | TIKSPERTEEVLSPD       |
| S          |              | 1        | 0.030635    | 0.036966 | 1.04944    | 0.891416  | Q9ESC8  | AF4/FMR2     | Aff4       | SKAVGMPPSPVSPKLS      |
| S          |              | 1        | 0.00099     | 0.963857 | -1.941494  | -0.050827 | Q9WTQ5  | A-kinase ar  | Akap12     | ERKALGSLEGSPSL        |
| S          |              | 1        | 0.084643    | 0.043857 | -3.713123  | -4.05951  | Q9DBT5  | AMP deam     | Ampd2      | QRLERQISQDVKLEP       |
| S          |              | 1        | 0.391923    | 0.037003 | 2.127355   | 4.811512  | S4R291  | Ankyrin-2    | Ank2       | SGKPEKHSPPGSPSTK      |
| S          |              | 0.999991 | 0.279301    | 0.024114 | -1.060146  | -2.207697 | S4R291  | Ankyrin-2    | Ank2       | PEKHSPGSPSTKNER       |
| S          |              | 0.999997 | 0.036172    | 0.167253 | 0.701527   | 0.37992   | S4R291  | Ankyrin-2    | Ank2       | APDGRSKSESADASSL      |
| S          |              | 1        | 0.034768    | 0.297514 | -1.659965  | -0.680511 | S4R291  | Ankyrin-2    | Ank2       | SSGKSPSPDPTPSSE       |
| T          |              | 1        | 0.034178    | 0.022113 | 1.160325   | 1.16597   | S4R291  | Ankyrin-2    | Ank2       | DSLHQDTCENDREE        |
| S          |              | 0.999988 | 0.146417    | 0.021868 | -0.915137  | -1.468006 | B2RW11  |              | Ankrd34a   | PPSGAPGSPRTKRKL       |
| S          |              | 0.999958 | 0.018508    | 0.453584 | -1.889969  | -0.500984 | Q6PB70  | Anoctamin    | Ano8       | EPEGPPGSPGPEPQT       |
| S          |              | 0.5      | 0.049953    | 0.025221 | -0.71204   | -0.769878 | P17426  | AP-2 comp    | Ap2a1      | IAGDPRSSPPVQFSL       |
| S          |              | 0.999753 | 0.046697    | 0.026207 | 0.841238   | 0.882877  | P98084  | Amyloid be   | Apba2      | RRMPRSASQDCIETT       |
| S          |              | 1        | 0.009347    | 0.005301 | 0.966607   | 0.98757   | P55088  | Aquaporin    | Aqp4       | AAQQTKGSYMEVEDN       |
| S          |              | 1        | 0.054287    | 0.016915 | -3.763118  | -4.622976 | A2A5R2  | Brefeldin A  | Arfgef2    | EAPRERGSPPVSGRAE      |
| S          |              | 0.999998 | 0.034233    | 0.008076 | 0.743199   | 0.958467  | Q8COD4  | Rho GTPas    | Arhgap12   | SQEQSCDSAGEGGER       |
| S          |              | 0.999993 | 0.540368    | 0.023785 | 1.071429   | 3.517325  | Q6DFV3  | Rho GTPas    | Arhgap21   | KSEPKTQSPHSPKEE       |
| S          |              | 1        | 0.212794    | 0.017479 | 2.095154   | 4.157474  | Q6DFV3  | Rho GTPas    | Arhgap21   | PKTQSPHSPKEESER       |
| S          |              | 1        | 0.016204    | 0.981027 | -1.92092   | 0.068558  | E9PYT0  | Rho GTPas    | Arhgap5    | SEDVFLPSPRDCFPY       |
| S          |              | 1        | 0.018471    | 0.006701 | 0.751854   | 0.860599  | Q60875  | Rho guanir   | Arhgef2    | REAQELGSPEDRLQD       |
| S          |              | 1        | 0.022061    | 0.010775 | 3.098273   | 3.3159    | Q8K4I3  | Rho guanir   | Arhgef6    | RKTERKASEEYVIR        |
| S          |              | 0.999426 | 0.062379    | 0.018072 | 1.067205   | 1.34445   | Q9DCB4  | cAMP-regu    | Arpp21     | GKLSKTGSESSSAG        |
| S          |              | 0.994467 | 0.015507    | 0.132835 | 6.57646    | 3.117704  | Q8BHE3  | Caytaxin     | Atcay      | GAVEDSSSPPTLNL        |
| S          |              | 1        | 0.060382    | 0.008609 | -0.55929   | -0.836916 | P50516  | V-type pro   | Atp6v1a    | AVETTAQSDNKITWS       |
| S          |              | 0.999895 | 0.031499    | 0.03998  | 0.83171    | 0.696356  | Q61687  | Transcripti  | Atrx       | SHTGFCQSSGDEALS       |
| S          |              | 0.999885 | 0.031499    | 0.03998  | 0.83171    | 0.696356  | Q61687  | Transcripti  | Atrx       | HTGFCQSSGDEALSK       |
| S          |              | 1        | 0.982217    | 0.019373 | -0.042061  | -0.931133 | Q3U9H3  | Bcl2-associ  | Bad        | KGLPRPKSAGTATQM       |
| S          |              | 1        | 0.028386    | 0.075396 | 0.72087    | 0.485426  | Q8CGM1  | Brain-speci  | Bai2;Adgrb | TGTLRSLRSLDEDEEP      |
| S          |              | 0.999834 | 0.039723    | 0.185048 | 2.413107   | 1.286599  | Q61361  | Brevican cc  | Bcan       | EVGGGTGSPELSGVP       |
| S          |              | 0.941461 | 0.009554    | 0.617384 | -3.983883  | -0.67152  | Q61361  | Brevican cc  | Bcan       | EDGGGGSSTPEDPAE       |
| S          |              | 0.991641 | 0.03744     | 0.48974  | 1.082805   | 0.325613  | Q80YN3  | Breast carc  | Bcas1      | LRQMSVRSSEGIPRS       |
| S          |              | 0.985049 | 0.031303    | 0.299531 | 0.820446   | 0.325613  | Q80YN3  | Breast carc  | Bcas1      | RQMSVRSSEGIPRSE       |
| S          |              | 0.98754  | 0.021081    | 0.013171 | -2.342819  | -2.359435 | Q9D219  | B-cell CLL/I | Bcl9       | IPVEGPLSPSRGDFP       |
| S          |              | 1        | 0.158655    | 0.044762 | 0.621396   | 0.846204  | Q8K019  | Bcl-2-associ | Bclaf1     | HSHSIQHSPERSGSG       |
| S          |              | 1        | 0.089344    | 0.026065 | -0.887194  | -0.929527 | P28028  | Serine/thre  | Braf       | ASRNNPKSPQKPIVR       |
| S          |              | 1        | 0.608058    | 0.021437 | 0.310541   | -1.184387 | Q8CFK2  | Transcripti  | Brf1       | LNSKGGGSPPLRDDSQ      |
| S          |              | 1        | 0.356509    | 0.04755  | 0.483486   | 0.958363  | Q5RJI5  | Serine/thre  | Brsk1      | PPRKRVDSPMLSRHG       |
| S          |              | 0.999798 | 0.592882    | 0.014412 | 0.519034   | -2.128147 | Q5RJI5  | Serine/thre  | Brsk1      | QHSQRSRVSVSGASTG      |
| S          |              | 0.762797 | 0.123091    | 0.030249 | 0.598505   | 0.825566  | Q5RJI5  | Serine/thre  | Brsk1      | PPPPSARSTPLPGPP       |
| S          |              | 1        | 0.092076    | 0.008221 | -0.524227  | -0.907153 | Q5RJI5  | Serine/thre  | Brsk1      | SPLSSPRSPVFSFSP       |
| S          |              | 0.999892 | 0.021717    | 0.00925  | 2.225422   | 2.460762  | O88737  | Protein ba   | Bsn        | PPEVGRVSPQPPLST       |
| S          |              | 0.999999 | 0.056648    | 0.040216 | 0.759068   | 0.750076  | O88737  | Protein ba   | Bsn        | RDACEPESGPDSTV        |
| S          |              | 0.717082 | 0.548291    | 0.019801 | 0.472686   | 1.650247  | Q7TP55  | C2 domain    | C2cd5      | AAFLPACSSPSRELK       |
| S          |              | 0.999939 | 0.009595    | 0.013405 | 2.890672   | 2.383558  | Q01815  | Voltage-de   | Cacna1c    | NNQADTESPSHEKLV       |
| S          |              | 0.983258 | 0.065186    | 0.026323 | 1.645447   | 1.905609  | Q8R0S4  | Voltage-de   | Cacnb4     | DGTTTSTFILRQGS        |

|   |          |      |          |          |           |           |          |               |          |                   |
|---|----------|------|----------|----------|-----------|-----------|----------|---------------|----------|-------------------|
| S | 1        | 96   | 0.007281 | 0.083837 | 1.140867  | 0.52868   | Q80TJ1   | Calcium-de    | Cadps    | SPSPSVVSEKEEEL    |
| S | 0.999012 | 358  | 0.185108 | 0.026078 | 1.974028  | 3.323353  | Q5SVJ0   | Calcium/ca    | Camk2b   | VDGKQTNSTKNSSAI   |
| S | 0.998992 | 371  | 0.809526 | 0.000976 | -0.47616  | -5.930677 | Q5SVI3   |               | Camk2b   | VDGKISSDSTNTTI    |
| S | 0.998992 | 332  | 0.846313 | 0.001348 | -0.47616  | -6.266922 | Q5SVI9   |               | Camk2b   | ADGVKISSDSTNTTI   |
| S | 0.998992 | 395  | 0.82138  | 0.001045 | -0.47616  | -6.069335 | Q5SVJ0   | Calcium/ca    | Camk2b   | VDGKISSDSTNTTI    |
| T | 0.99992  | 370  | 0.034717 | 0.22122  | -2.061826 | -0.97886  | E9Q1T1   | Calcium/ca    | Camk2d   | ESTESSNTTIEDEDV   |
| S | 0.837042 | 41   | 0.0091   | 0.004223 | 2.030858  | 2.171838  | F7A856   |               | Camk2d   | ALESTESSNTTIEDE   |
| S | 0.808458 | 560  | 0.046956 | 0.466305 | -0.706751 | -0.235883 | A2AHC3   | Calmodulir    | Camsap1  | SPQMPRTSPQAPGLV   |
| S | 0.999951 | 1285 | 0.330568 | 0.038448 | -1.823339 | -3.670443 | Q8C1B1   | Calmodulir    | Camsap2  | KRTPRESVEGFLSP    |
| S | 0.996915 | 1291 | 0.380781 | 0.005704 | -1.133948 | -4.021826 | Q8C1B1   | Calmodulir    | Camsap2  | ESVEGLFSPRCGSR    |
| S | 1        | 334  | 0.049412 | 0.048451 | 1.426536  | 1.283268  | Q80VC9   | Calmodulir    | Camsap3  | LPDGHAVSPRNTETV   |
| S | 0.999982 | 1077 | 0.018821 | 0.244949 | -2.023403 | 0.778525  | Q80VC9   | Calmodulir    | Camsap3  | RPTSRAPSPSGLMSP   |
| S | 1        | 553  | 0.006274 | 0.574906 | -4.434162 | 0.732327  | P35564   | Calnexin      | Canx     | KLEEKQKSDAEEDGV   |
| S | 1        | 563  | 0.006274 | 0.574906 | -4.434162 | 0.732327  | P35564   | Calnexin      | Canx     | EEDGVTGSDQDEEDSK  |
| S | 1        | 31   | 0.08531  | 0.018457 | 0.534838  | 0.740024  | Q9CR86   | Calcium-re    | Carhsp1  | TRPTRDRSPSPLRGN   |
| S | 1        | 33   | 0.08531  | 0.018457 | 0.534838  | 0.740024  | Q9CR86   | Calcium-re    | Carhsp1  | RTRDRSPSPLRGNVV   |
| S | 1        | 728  | 0.061361 | 0.032904 | 1.047071  | 1.12081   | Q6P9K8   | Caskin-1      | Caskin1  | PGSPMSRSQEYLLDE   |
| S | 1        | 559  | 0.038598 | 0.088565 | 0.712413  | 0.495314  | Q8CI71   | Coiled-coil   | Ccdc132  | SAYQDYDSDSDVPEE   |
| S | 1        | 250  | 0.028185 | 0.141571 | -2.242117 | 1.211111  | Q5SP85   | Coiled-coil   | Ccdc85a  | HTKHRSTSPPEHLKPK  |
| S | 1        | 330  | 0.007446 | 0.054612 | 1.105898  | 0.588803  | Q5SP85   | Coiled-coil   | Ccdc85a  | HTRHSGGSPPEHLQKH  |
| S | 1        | 129  | 0.025118 | 0.017346 | 1.229759  | 1.210365  | Q8QZT2   | Centriole,    | c Ccsap  | KETDGA5SGPGRPQQ   |
| S | 1        | 136  | 3.49E-05 | 0.068488 | -4.43249  | 0.700307  | Q9JM96   | Cdc42 effe    | Cdc42ep4 | DSSKLPKSLSSSPVK   |
| S | 0.999619 | 140  | 4.65E-06 | 0.024544 | -4.975846 | 0.700307  | Q9JM96   | Cdc42 effe    | Cdc42ep4 | LPKSLSSSPVKKADA   |
| S | 1        | 300  | 0.003678 | 0.001686 | 3.368344  | 3.581501  | Q14AX6-3 | Cyclin-depr   | Cdk12    | PYSRRQRSVSPYSRR   |
| S | 0.999994 | 302  | 0.010844 | 0.005033 | 2.974704  | 3.187861  | Q14AX6-3 | Cyclin-depr   | Cdk12    | SRRQRSVSPYSRRRS   |
| T | 1        | 871  | 0.15176  | 0.000867 | 0.482177  | 1.650986  | Q69ZA1   | Cyclin-depr   | Cdk13    | SEESRPYTNKVITLW   |
| S | 1        | 112  | 0.140791 | 0.017982 | 2.761641  | 4.58898   | Q35495   | Cyclin-depr   | Cdk14    | SSSAGKESPKVRHHS   |
| S | 1        | 66   | 0.071408 | 0.01714  | 1.453141  | 1.934897  | Q04899   | Cyclin-depr   | Cdk18    | RQNQRFRFSPMEDLNKR |
| S | 1        | 56   | 0.031923 | 0.05567  | 2.384585  | 1.820197  | P98191   | Phosphatic    | Cds1     | DLDARGSDVPEVPP    |
| S | 1        | 1102 | 0.178173 | 0.02512  | 0.494068  | 0.82673   | Q6A065   | Centrosom     | Cep170   | RARLGEASDSELADA   |
| S | 0.999999 | 829  | 0.027339 | 0.317248 | 0.729871  | 0.270536  | Q6A065   | Centrosom     | Cep170   | KSLVRQGSFTIDKPS   |
| S | 1        | 33   | 0.002601 | 0.095874 | -1.919768 | -0.672855 | Q91VN4   | MICOS con     | Chchd6   | QGIRLESVVNRMKD    |
| S | 1        | 342  | 0.030268 | 0.004045 | 0.645562  | 0.944791  | P16014   | Secretogra    | Chgb     | HLAHRASEEEPEYG    |
| S | 0.999716 | 194  | 0.040548 | 0.124265 | -5.699132 | -3.571921 | Q8CJ61   | CKLF-like     | v Cmtm4  | YIRARTESRDVDSRP   |
| S | 0.999998 | 27   | 0.25812  | 0.026023 | -1.366086 | -2.678583 | Q9DBC3   | Cap-specifi   | Cmtr1    | GELARHLSTSDDEP    |
| S | 0.9996   | 22   | 0.131031 | 0.001929 | -1.877984 | 5.114119  | P16330   | 2',3'-cyclic- | Cnp      | KLFFRKMSSSGAKEK   |
| S | 0.999982 | 123  | 0.037566 | 0.038404 | 2.690849  | 2.391966  | Q9EQG9   | Collagen ty   | Col4a3bp | KTESGYGSESSLRRH   |
| S | 0.968484 | 261  | 0.020685 | 0.353271 | -6.30165  | -2.038086 | O88587   | Catechol O    | Comt     | VYQPGGSSPVKS      |
| S | 1        | 62   | 0.03274  | 0.063433 | 1.919215  | 1.417915  | Q91X84   | CREB-regul    | Crtc3    | LTQYHGGSLPNVSQL   |
| S | 1        | 528  | 0.93497  | 0.000954 | 0.102585  | -2.326902 | E9QKH8   | Catenin de    | Ctnnd2   | PETGLARSPINSQ     |
| S | 1        | 970  | 0.064017 | 0.037619 | 1.747975  | 1.826577  | Q62018   | RNA polym     | Ctr9     | PPKGEEGSEEEETEN   |
| T | 0.99989  | 47   | 0.077819 | 0.008101 | 0.703127  | 1.155449  | Q9JHS9   | Spliceosom    | Cwc15    | KIKYRQTTQDAPEEV   |
| S | 1        | 116  | 0.007831 | 0.002844 | 1.020139  | 1.15066   | Q8R4T1   | Cystin-1      | Cys1     | ASEAPGNPKRPEGQ    |
| S | 1        | 978  | 0.030495 | 0.078169 | 0.854976  | 0.580219  | Q3UHC7   | Disabled h    | Dab2ip   | SSSSKGDSPKLPRA    |
| S | 0.999331 | 137  | 0.088562 | 0.017561 | -2.359279 | -3.346957 | E9QNN1   | ATP-depen     | Dhx9     | VESSGYGSPGPTWDR   |
| S | 1        | 185  | 0.161747 | 0.040669 | 0.602574  | 0.849833  | Q6PFD5   | Disks large   | Dlgap3   | KLFAKSHSLEAPGKR   |
| S | 0.999999 | 970  | 0.009041 | 0.122554 | -3.780975 | -1.61843  | B1AZP2-2 | Disks large   | Dlgap4   | AASVRQNSATESADS   |
| S | 0.998603 | 92   | 0.16237  | 0.031784 | 0.577862  | 0.87405   | Q9WV69   | Dematin       | Dmtn     | SLSPKSTSPPPSPEV   |
| S | 0.999999 | 96   | 0.140303 | 0.019067 | 0.466525  | 0.762713  | Q9WV69   | Dematin       | Dmtn     | KSTSPPPSPEVWAE    |
| S | 1        | 473  | 0.004903 | 0.029051 | 0.890074  | 0.514021  | Q8BPN8   | DmX-like      | p Dmxl2  | EDGEREGSPRTHPRP   |
| S | 0.999883 | 851  | 0.000771 | 0.728306 | -4.135458 | 0.314247  | P39053-4 | Dynamine-1    | Dnm1     | PSRSGQASPRPESP    |
| S | 1        | 591  | 0.107619 | 0.029499 | 3.089475  | 4.090008  | Q66L44   | Protein Do:   | Dos      | QQRGRQHSDPGGAR    |
| S | 1        | 297  | 0.097545 | 0.021088 | 1.290369  | 1.804359  | Q66L44   | Protein Do:   | Dos      | TRLRHSHSLDGASPY   |
| S | 1        | 537  | 0.031244 | 0.059824 | -4.502644 | -3.343619 | O08553   | Dihydropyr    | Dpysl2   | PVRNLHQSGFSLSGA   |
| T | 1        | 521  | 3.3E-06  | 0.372349 | -6.807012 | 0.327087  | O08553   | Dihydropyr    | Dpysl2   | TPASSAKTSPAKQQA   |
| S | 0.999992 | 534  | 0.033266 | 0.036369 | -1.192519 | -1.040673 | Q9EQF6   | Dihydropyr    | Dpysl5   | DLHESSFLSGSQID    |
| S | 0.999875 | 538  | 0.996548 | 0.037686 | -0.064718 | -2.738684 | Q9EQF6   | Dihydropyr    | Dpysl5   | SSFSLSGSQIDHVP    |
| S | 0.9966   | 516  | 0.011796 | 0.392553 | -1.331211 | -0.34968  | Q8R1Q8   | Cytoplasm     | Dync1li1 | VSPTTPTSPTGEAS    |
| S | 1        | 128  | 0.002914 | 0.001471 | 1.344159  | 1.397377  | Q91VK2   | Elongation    | Eef1d    | APQQTQHVSPMRQVEP  |
| S | 0.987009 | 220  | 0.017597 | 0.036586 | 1.089923  | 0.803017  | Q8BG67   | Protein EFF   | Efr3a    | SRLGPPSSPAADKE    |
| S | 1        | 262  | 0.640964 | 0.001023 | 0.26261   | 2.156653  | Q9DCH4   | Eukaryotic    | Eif3f    | LIMKTCFSPNRVIGL   |

|   |          |      |          |          |           |           |          |                          |                  |
|---|----------|------|----------|----------|-----------|-----------|----------|--------------------------|------------------|
| S | 1        | 38   | 0.344327 | 0.046442 | 0.424062  | 0.828657  | Q61701   | ELAV-like p Elavl4       | SNNRNCPSPMQTGAA  |
| S | 1        | 737  | 0.011156 | 0.037729 | -0.938133 | 0.612063  | E9PV14   | Epb4.111                 | QTEARADSSDETDTDS |
| S | 1        | 75   | 0.031098 | 0.087834 | 0.723056  | 0.474909  | A2AUK5   | Band 4.1-iii Epb4.111;Ej | YSEADGLSERTTPSK  |
| S | 1        | 543  | 0.000988 | 0.361169 | -1.749927 | -0.276706 | O70318   | Band 4.1-iii Epb4112     | SSKRVSRSLDGAPIG  |
| S | 0.99719  | 302  | 0.005647 | 0.864747 | -2.314634 | 0.180125  | P70429   | Ena/VASP-I Evl           | QTEDPSTSPSPGTRA  |
| S | 0.99986  | 278  | 0.904031 | 0.03251  | 0.248779  | -1.999417 | Q6NS82   | Protein FAI Fam134a      | LAETESEAEALAGF   |
| S | 0.99998  | 405  | 0.092557 | 0.012059 | 3.228845  | 5.104128  | Q9DBR2   | Protein FAI Fam13c       | AVGPEPGSSGEETS   |
| S | 0.999908 | 406  | 0.305121 | 0.036449 | 1.949698  | 3.807331  | Q9DBR2   | Protein FAI Fam13c       | VGPEPGSSGEETS    |
| S | 1        | 630  | 0.000346 | 0.000727 | -0.96955  | -0.741526 | Q5XG69   | Soluble lan Fam169a      | SAEKAVDSSSEIEV   |
| S | 1        | 631  | 0.000346 | 0.000727 | -0.96955  | -0.741526 | Q5XG69   | Soluble lan Fam169a      | AEKAVDSSSEIEVE   |
| S | 1        | 785  | 0.089301 | 0.021056 | -0.646997 | -0.878607 | A2A699   | Protein FAI Fam171a2     | ASELRRDSLTPPEDE  |
| S | 1        | 788  | 0.089301 | 0.021056 | -0.646997 | -0.878607 | A2A699   | Protein FAI Fam171a2     | LRRDSLTPPEDELGA  |
| T | 1        | 787  | 0.089301 | 0.021056 | -0.646997 | -0.878607 | A2A699   | Protein FAI Fam171a2     | ELRRDSLTPPEDELG  |
| S | 1        | 723  | 0.030417 | 0.162466 | -3.084577 | -1.611703 | Q6PGL7   | WASH com Fam21           | PKVPLLFSDDEEDSEV |
| T | 1        | 24   | 0.031539 | 0.054558 | 0.78434   | 0.600334  | F8VPU2   | FERM, Rho Farp1          | PENSGISTLERGQKP  |
| S | 1        | 171  | 0.000186 | 0.981919 | -5.199535 | 0.067227  | A2APV2   | Formin-like Fmn12        | KSKPWSRSIEDLHRG  |
| S | 0.999974 | 270  | 0.573157 | 0.041197 | 0.496024  | 1.486557  | F6XM46   | FERM dom Frmd5           | AGMVPSPRSCPSITHG |
| S | 0.999999 | 2815 | 0.020748 | 0.398288 | -2.661656 | 0.797668  | E9Q8I9   | Protein fur Fry          | KATFAGGSRDGVITC  |
| S | 0.999999 | 192  | 0.792906 | 0.031627 | -0.644098 | -3.371165 | P06837   | Neuromod Gap43           | PPTETAESSQAEEEK  |
| S | 0.999999 | 86   | 0.015227 | 0.714623 | -5.051829 | -0.78007  | P06837   | Neuromod Gap43           | EKKEGDGSATTDAA   |
| S | 0.997092 | 110  | 0.006723 | 0.001552 | 1.85584   | 2.307354  | Q8CHY6   | Transcripti Gatad2a      | SDSEQPSSPRVNGLT  |
| S | 0.999989 | 1786 | 0.648208 | 0.041876 | 0.536675  | 1.845662  | Q6DFZ1   | Gbf1                     | PSSSSPGSPMASSPS  |
| S | 0.999202 | 1414 | 0.119186 | 0.04152  | 1.137751  | 1.420878  | E9PUU4   | Gemin5                   | RAPSQPPSPTRERN   |
| S | 1        | 83   | 0.944662 | 0.043189 | 0.187948  | 1.87027   | Q99JP7   | Gamma-glt Ggt7           | EMGSQDQGSPLRETRK |
| S | 1        | 365  | 0.931438 | 0.016801 | -0.392493 | -4.490607 | P23242   | Gap juncti Gja1          | IVDQRPSRASSRAS   |
| S | 0.999449 | 96   | 0.815887 | 0.040565 | -0.354604 | -1.85769  | Q8K3I9   | Glucocortic Glcci1       | PGGARGPSPSSPTPP  |
| S | 0.999998 | 8    | 0.046285 | 0.032613 | 3.278355  | 3.23541   | P63213   | Guanine nt Gng2          | MASNNTASIAQARKL  |
| S | 0.999819 | 51   | 0.338031 | 0.049623 | -1.144683 | -2.170138 | P36916   | Guanine nt Gnl1          | REEQTDSDGSESVTH  |
| S | 0.999999 | 338  | 0.014955 | 0.758684 | -4.052225 | 0.559799  | Q8BUV3   | Gephyrin;h Gphn          | NILRASHSAVDITKV  |
| S | 1        | 267  | 0.015025 | 0.051929 | -0.778065 | -0.49835  | P35802   | Neuronal n Gpm6a         | QELHDIHSTRSKERL  |
| T | 1        | 268  | 0.015025 | 0.051929 | -0.778065 | -0.49835  | P35802   | Neuronal n Gpm6a         | ELHDIHSTRSKERLN  |
| S | 1        | 622  | 0.03447  | 0.076796 | -3.35006  | -2.36432  | Q3UNH4   | G protein-r Gprn1        | KADSASPSRKAESQ   |
| S | 0.997959 | 174  | 0.065733 | 0.015663 | 0.650067  | 0.862843  | Q80TI0-4 | GRAM dom Gramd1b         | ILRKRSRSTPQNQD   |
| T | 0.999962 | 200  | 0.010539 | 0.010497 | 0.717178  | 0.642084  | Q80TI0-4 | GRAM dom Gramd1b         | SSDKSPSTPEQGVQR  |
| S | 1        | 2    | 0.044588 | 0.006521 | 1.606254  | 2.34638   | Q2NL51   | Glycogen s Gsk3a         | _____MSGGGPGSGG  |
| S | 1        | 580  | 0.105716 | 0.020761 | 0.548978  | 0.792363  | O08582   | GTP-bindin Gtpbp1        | LLQTTNNSPMNSKPQ  |
| S | 1        | 647  | 0.009193 | 0.004839 | 1.888618  | 1.962681  | Q9Z1E4   | Glycogen [: Gys1         | ASVPPSPSLSRHSSP  |
| S | 0.998862 | 5    | 0.035218 | 0.968604 | 2.842296  | -0.160881 | P10922   | Histone H1 H1f0          | _____MTENSTAPAAK |
| S | 1        | 81   | 0.022859 | 0.544626 | -1.959877 | -0.469139 | A8DUK4   | Hemoglobi Hbbt1;Hbb      | DGLNHLDSLKGTTFAS |
| S | 1        | 842  | 0.01003  | 0.035066 | -0.736241 | -0.477772 | O88703   | Potassium/ Hcn2          | PDRRDASPGAASGL   |
| S | 1        | 847  | 0.01003  | 0.035066 | -0.736241 | -0.477772 | O88703   | Potassium/ Hcn2          | SASPGAASGLDPLDS  |
| S | 1        | 394  | 0.037069 | 0.832899 | -3.016815 | -0.42447  | P70288   | Histone de Hdac2         | EDAVHEDSGDEDED   |
| S | 0.999898 | 68   | 0.116053 | 0.023963 | 3.092815  | 4.444126  | Q8K4P8   | E3 ubiquiti Hecw1        | ITIPRSTSDTLVTS   |
| S | 1        | 321  | 0.058578 | 0.024191 | 0.97875   | 1.121874  | Q640R3   | Hepatocyt Hepacam        | ILKDKDSSEPDENPA  |
| S | 1        | 302  | 0.000111 | 0.000124 | 2.21475   | 1.934174  | Q8R1M0   | Embryonic Hmces          | PKKEVPDPPKDDASG  |
| S | 0.998617 | 233  | 0.023356 | 0.337652 | -0.798957 | -0.274027 | Q9Z204-2 | Heterogen Hnrnpc         | EKSEEQSSASVKKD   |
| S | 0.99999  | 236  | 0.023356 | 0.337652 | -0.798957 | -0.274027 | Q9Z204-2 | Heterogen Hnrnpc         | EEEQSSASVKKDETN  |
| S | 1        | 159  | 0.004232 | 0.001454 | 0.976594  | 1.107015  | Q99JP6-2 | Homer pro Homer3         | EKLFRSQSADTPGPT  |
| S | 1        | 112  | 0.051843 | 0.00043  | 1.357604  | 3.762679  | Q3TEA8   | Heterochrc Hp1bp3        | KEENNNKSAEPEPKD  |
| T | 1        | 540  | 0.068508 | 0.024126 | 0.717548  | 0.863584  | Q61316   | Heat shock Hspa4         | EQQQQPQTPAENKAE  |
| S | 1        | 254  | 0.039187 | 0.185421 | -4.012726 | -2.129483 | P63017   | Heat shock Hspa8         | RKHKKDISENKRAVR  |
| S | 1        | 1853 | 0.772374 | 0.046519 | 0.17916   | 0.794526  | P42859   | Huntingtin Htt           | KSLNPQKSGEEDSG   |
| S | 0.999985 | 636  | 0.003928 | 0.00607  | -0.740924 | -0.59979  | Q8K3X4   | Interferon Irf2bpl       | TASARRNSSSPVSPA  |
| S | 0.998238 | 638  | 0.003928 | 0.00607  | -0.740924 | -0.59979  | Q8K3X4   | Interferon Irf2bpl       | SARRNSSSPVSPASV  |
| S | 1        | 641  | 0.003928 | 0.00607  | -0.740924 | -0.59979  | Q8K3X4   | Interferon Irf2bpl       | RNSSSPVSPASVPGQ  |
| S | 0.999933 | 343  | 0.870215 | 0.005775 | -0.246469 | -2.579661 | P35569   | Insulin rec Irs1         | SVDGSPVSPSTNRTH  |
| S | 0.999963 | 303  | 0.000327 | 0.69024  | -5.518072 | -0.381477 | P81122   | Insulin rec Irs2         | EFRPRSKSQSSGSSA  |
| S | 0.999686 | 756  | 0.002    | 0.456971 | -3.008861 | -0.471289 | Q5DTX6   | Junctional Jcad          | LQGQTSLSPSRNSAF  |
| S | 0.997127 | 172  | 0.003939 | 0.807341 | -1.535185 | 0.134906  | Q8K0T4   | Katanin p6 Katnal1       | KNVQDGASDSEIPKF  |
| S | 1        | 440  | 0.016029 | 0.022467 | -0.97697  | -0.801563 | P63141   | Potassium Kcna2          | TSCPkipSSPLKKS   |
| S | 1        | 441  | 0.016029 | 0.022467 | -0.97697  | -0.801563 | P63141   | Potassium Kcna2          | SCPkipSSPLKKS    |

|   |          |      |          |          |           |           |          |              |           |                  |
|---|----------|------|----------|----------|-----------|-----------|----------|--------------|-----------|------------------|
| S | 0.999443 | 9    | 0.109993 | 0.031574 | 0.61053   | 0.799583  | P62482   | Voltage-ga   | Kcnab2    | YPESTTGSPARLSLR  |
| S | 0.999995 | 2603 | 0.408646 | 0.011995 | 0.460438  | -1.435202 | A2AAE1   | Uncharacter  | Kiaa1109  | RYTAGSASPTTFKKT  |
| S | 0.970831 | 607  | 0.065543 | 0.004132 | 0.561761  | 1.022146  | Q91YS4   |              | Klc2      | DSRTLSSSSMDLSRR  |
| S | 1        | 445  | 0.102358 | 0.007093 | 0.959357  | 1.781816  | Q91YS4   | Kinesin ligh | Klc2      | YKACKVDSPTVNTTL  |
| S | 1        | 1160 | 0.187424 | 0.017073 | 0.444484  | 0.839394  | A2AFG7   |              | L1cam     | KEDTQVDSEARPMKD  |
| S | 1        | 1166 | 0.187424 | 0.017073 | 0.444484  | 0.839394  | P11627   | Neural cell  | L1cam     | KEDTQVDSEARPMKD  |
| S | 1        | 1522 | 0.84716  | 0.007493 | -0.12597  | -1.131197 | Q80TS3   | Latrophilin  | Lphn3;Adg | PPNKDGASPEGTSKG  |
| S | 0.999465 | 1536 | 0.073447 | 0.006065 | -0.839038 | -1.448659 | Q80TS3   | Latrophilin  | Lphn3;Adg | GPAHLVTSL_____   |
| S | 0.995257 | 343  | 0.422738 | 0.043443 | -0.513613 | -1.169644 | Q7TPB0   | Lipid phosφ  | Lppr3     | PVAREKTSLSGLKRA  |
| S | 0.997145 | 4452 | 0.029129 | 0.004731 | 0.579667  | 0.810154  | E9QA63   | Microtubul   | Macf1     | KAMDATLSPTKTETV  |
| T | 1        | 1045 | 0.131184 | 0.015322 | 0.566143  | 0.953801  | A2AGQ7   |              | Madd      | SPTENVNTPVGKDPG  |
| S | 1        | 322  | 0.621223 | 0.047274 | 0.790875  | 2.491646  | Q9QYR6   | Microtubul   | Map1a     | HRADSKESLKAAPKT  |
| S | 0.999698 | 2212 | 0.495388 | 0.008816 | 1.607631  | 6.251569  | Q9QYR6   | Microtubul   | Map1a     | PQLPSPSPGAPLLS   |
| S | 0.980162 | 852  | 0.006197 | 0.56667  | -3.03799  | -0.50781  | Q9QYR6   | Microtubul   | Map1a     | AEDQSVASLTAPQTE  |
| S | 1        | 2267 | 0.02819  | 0.02086  | 0.85346   | 0.826287  | P14873   | Microtubul   | Map1b     | KSKPLAASPKPGALK  |
| S | 1        | 2122 | 0.107332 | 0.036875 | 0.627079  | 0.780173  | P14873   | Microtubul   | Map1b     | SEKPLTQSGGAPPPS  |
| S | 1        | 1497 | 0.024343 | 0.002865 | 0.664743  | 0.991887  | P14873   | Microtubul   | Map1b     | RKLGGDVSTPQIDVS  |
| S | 1        | 1508 | 0.024343 | 0.002865 | 0.664743  | 0.991887  | P14873   | Microtubul   | Map1b     | IDVSQFGSKEDTKM   |
| S | 1        | 1768 | 0.003664 | 0.762229 | -3.448493 | -0.33869  | P14873   | Microtubul   | Map1b     | LASEKVQSLEGEKLS  |
| S | 1        | 1352 | 0.021927 | 0.005012 | 0.677673  | 0.867076  | P20357   | Microtubul   | Map2      | QAEPKDGSPDAPATP  |
| S | 0.989397 | 476  | 0.035921 | 0.074035 | 0.863591  | 0.623712  | P20357   | Microtubul   | Map2      | IQTSTEQFSKEDQK   |
| S | 1        | 1352 | 0.090164 | 0.020975 | -0.537002 | -0.7323   | P20357   | Microtubul   | Map2      | QAEPKDGSPDAPATP  |
| S | 0.999937 | 136  | 0.06415  | 0.02359  | -0.913287 | -1.08336  | P20357   | Microtubul   | Map2      | ETANLPPSPPPSPAS  |
| T | 1        | 1620 | 0.141072 | 0.035502 | 0.560634  | 0.77867   | P20357   | Microtubul   | Map2      | YSSRTPGTPGTPSYSP |
| T | 1        | 1623 | 0.141072 | 0.035502 | 0.560634  | 0.77867   | P20357   | Microtubul   | Map2      | RTPGTPGTPSYPRTP  |
| T | 1        | 1358 | 0.090164 | 0.020975 | -0.537002 | -0.7323   | P20357   | Microtubul   | Map2      | GSPDAPATPEKEEVA  |
| T | 0.687039 | 1594 | 0.992254 | 0.001554 | -0.096538 | 5.849223  | P20357   | Microtubul   | Map2      | RKAGKSTSTPTTPG   |
| T | 0.987626 | 1164 | 0.013429 | 0.019002 | 2.755707  | 2.259056  | P20357   | Microtubul   | Map2      | KKETSPETSLIQDEV  |
| S | 0.888631 | 391  | 0.012768 | 0.016157 | -2.847166 | -2.401934 | P47809   | Dual specif  | Map2k4    | DQMPATPSSPMYVD_  |
| S | 0.994743 | 900  | 0.017457 | 0.367394 | -1.492288 | -0.451045 | Q1HKZ5   | Mitogen-α    | Map3k13   | SSHSDGLSDKECAVR  |
| S | 0.568219 | 540  | 0.043443 | 0.999619 | 1.375165  | -0.00898  | Q3U1V8   | Mitogen-α    | Map3k9    | KSLISNRSSPPASPT  |
| S | 1        | 667  | 0.017215 | 0.078731 | -0.981239 | -0.572133 | P27546-3 | Microtubul   | Map4      | PNKEPPSPPEKKAKP  |
| T | 0.999582 | 658  | 0.017215 | 0.078731 | -0.981239 | -0.572133 | P27546-3 | Microtubul   | Map4      | VTGNDITTPPNKEPP  |
| S | 0.999985 | 611  | 0.241628 | 0.026798 | 0.516981  | 0.973927  | E9PVG7   | Mitogen-α    | Map4k4    | SPVSRSHSFSDPSPK  |
| S | 0.999986 | 616  | 0.241628 | 0.026798 | 0.516981  | 0.973927  | E9PVG7   | Mitogen-α    | Map4k4    | SHSFSDPSPKFAHHH  |
| S | 1        | 86   | 0.007022 | 0.006978 | 4.121856  | 3.692181  | Q7TSJ2   | Microtubul   | Map6      | TGPAPGPSVDRETVA  |
| T | 1        | 91   | 0.003819 | 0.003649 | 4.461083  | 4.031408  | Q7TSJ2   | Microtubul   | Map6      | GPSVDRETVAAPGRS  |
| S | 1        | 401  | 0.052416 | 0.041158 | 1.411954  | 1.35443   | A2AJI0   | MAP7 dom     | Map7d1    | RKPGAGGSPALARRR  |
| S | 1        | 315  | 0.004066 | 0.005397 | 2.108751  | 1.767916  | A2AG50   | MAP7 dom     | Map7d2    | AASGGHGSPLRRCPE  |
| S | 1        | 704  | 0.152961 | 0.024487 | -0.883124 | -1.398934 | A2A5Y6   | Microtubul   | Mapt      | GAEIVYSPVVSJGDT  |
| S | 0.998794 | 50   | 3.14E-06 | 0.135636 | -3.536259 | 0.272043  | A2A5Y6   | Microtubul   | Mapt      | DGAEPEGSETSDAKS  |
| S | 0.998794 | 50   | 0.000705 | 0.574937 | -2.669441 | 0.272043  | B1AQW6   |              | Mapt      | DGAEPEGSETSDAKS  |
| S | 1        | 507  | 0.152042 | 0.033262 | 0.816818  | 1.188897  | A2A5Y6   | Microtubul   | Mapt      | GERSGYSSPGSPGTP  |
| T | 1        | 513  | 0.025188 | 0.020683 | 1.006843  | 0.94809   | A2A5Y6   | Microtubul   | Mapt      | SSPGSPGTPGSRRT   |
| S | 1        | 619  | 0.188721 | 0.009988 | -0.522156 | -1.128624 | Q8K310   | Matrin-3     | Matr3     | TDAQKTESPAEGKEQ  |
| S | 0.999669 | 154  | 0.013858 | 0.007763 | 1.08482   | 1.116061  | Q8R3C0   | Mini-chron   | Mcmbp     | NANQARVSPSTSYTP  |
| S | 1        | 438  | 0.074572 | 0.013574 | 2.951135  | 4.222857  | Q9Z2D6-2 | Methyl-Cp    | Mecp2     | EKMPRGGSLSDGCP   |
| S | 0.999911 | 87   | 0.46516  | 0.049143 | 0.637052  | 1.503971  | Q9Z2D6-2 | Methyl-Cp    | Mecp2     | ETSESSGSAVAPEA   |
| T | 1        | 188  | 0.022285 | 0.100735 | -1.940894 | -1.114117 | Q8K3A9   | 7SK snRNA    | Mepce     | SRALNAETPKSSPLP  |
| S | 1        | 131  | 0.355117 | 0.02788  | 1.76211   | 4.042824  | Q6PCP5   | Mitochond    | Mff       | LKRERSMSENAVRQN  |
| S | 0.920945 | 5    | 0.082405 | 0.032213 | 3.602316  | 4.255742  | O35678   | Monoglyce    | Mgll      | ___MPEASSPRRTPQ  |
| S | 1        | 777  | 0.006753 | 0.006929 | 2.345376  | 2.085163  | Q8VDP3   | Protein-me   | Mical1    | SPPVTRVSPVSPSPQ  |
| S | 0.999203 | 781  | 0.005419 | 0.005859 | 2.140835  | 1.880622  | Q8VDP3   | Protein-me   | Mical1    | TRVSPVSPSPQPARR  |
| S | 0.999421 | 1150 | 0.474553 | 0.030336 | 0.368418  | 1.011984  | Q8CJ19   | Protein-me   | Mical3    | KQEERGTQVSSPSQ   |
| S | 1        | 699  | 0.012576 | 0.704077 | -5.584414 | -0.842249 | Q9JMS2   | Misshapen    | Mink1     | PAQAVRASNPDLRRS  |
| S | 0.943319 | 606  | 0.005306 | 0.003348 | 0.971943  | 0.96526   | Q8K4J6   | MKL/myoc     | Mkl1      | QQPAPASSPVKRESG  |
| S | 0.999885 | 139  | 0.064678 | 0.016893 | 0.906123  | 1.174176  | Q9ERV1   | Probable E   | Mkrn2     | GCDSPQTSPEMKPHS  |
| S | 1        | 256  | 0.005921 | 0.00396  | 1.696103  | 1.663471  | P54276   | DNA mism:    | Msh6      | RVISDESIDIGSDV   |
| T | 0.999997 | 298  | 0.031149 | 0.245443 | -1.763133 | -0.773796 | D3YTP3   |              | Mtx3      | KLPTLKLTPAEESN   |
| S | 0.961437 | 1968 | 0.005398 | 0.003426 | 4.338083  | 4.303144  | Q5SV64   | Myosin-10    | Myh10     | RGGPISFSSRSRGR   |
| S | 1        | 1983 | 0.496412 | 0.003859 | -0.165316 | -0.779936 | Q5SV64   | Myosin-10    | Myh10     | QLHIEGASLELSDDD  |



|   |          |      |          |          |           |           |          |                      |                   |
|---|----------|------|----------|----------|-----------|-----------|----------|----------------------|-------------------|
| S | 1        | 1987 | 0.496412 | 0.003859 | -0.165316 | -0.779936 | Q5SV64   | Myosin-10 Myh10      | EGASLELSDDDTESK   |
| S | 1        | 472  | 0.050608 | 0.01294  | 1.053843  | 1.355567  | E9Q411   | Nbas                 | EDEGEVSDSDPETS    |
| S | 1        | 770  | 0.045446 | 0.060347 | -2.880085 | -2.368774 | P13595   | Neural cell Ncam1    | EEGKAASFKDESKEP   |
| S | 1        | 774  | 0.045446 | 0.060347 | -2.880085 | -2.368774 | P13595   | Neural cell Ncam1    | AAFSDKESKEPIVEV   |
| S | 0.99437  | 887  | 0.020389 | 0.548981 | -1.463132 | -0.337393 | P13595   | Neural cell Ncam1    | GVTASSSSPASAPKV   |
| S | 0.999706 | 350  | 0.092542 | 0.020014 | 0.538008  | 0.749086  | Q9QYG0   | Protein ND NdrG2     | RSRRTLQSSESSEGT   |
| S | 1        | 789  | 0.156112 | 0.049236 | -1.475735 | -1.942426 | P19246   | Neurofilam Nefh      | KSPAEEKSPEKAKSP   |
| S | 1        | 523  | 0.630799 | 0.023268 | -0.791729 | -3.087347 | P19246   | Neurofilam Nefh      | RVKEEAKSPGEAKSP   |
| S | 0.999936 | 419  | 0.040839 | 0.978941 | -1.54545  | 0.074352  | P19246   | Neurofilam Nefh      | GFGPSPFSLTEGLPK   |
| S | 1        | 757  | 0.027431 | 0.236771 | -0.903628 | -0.389884 | P19246   | Neurofilam Nefh      | KSPAEEKSPAEEKSP   |
| S | 1        | 625  | 0.005145 | 0.349786 | -4.352593 | -1.011133 | P19246   | Neurofilam Nefh      | KSPAEEKSPAEEKSP   |
| S | 1        | 631  | 0.007985 | 0.456086 | -4.706833 | -1.011133 | P19246   | Neurofilam Nefh      | KSPAEEKSPAEEKSP   |
| S | 1        | 637  | 0.009568 | 0.44366  | -4.4147   | -1.011133 | P19246   | Neurofilam Nefh      | KSPAEEKSPATVKSP   |
| S | 1        | 723  | 0.011095 | 0.107097 | -5.31066  | -2.505447 | P08553   | Neurofilam Nefm      | EEEGSDRSPQESKKE   |
| S | 1        | 1164 | 0.069789 | 0.029913 | -1.794505 | -2.051323 | Q810U3   | Neurofasci Nfasc     | EDGSEFDYSDDEDNKPL |
| S | 1        | 1174 | 0.016591 | 0.028306 | 1.325003  | 1.031617  | Q810U3   | Neurofasci Nfasc     | DNKPLQGSQTSLDGDT  |
| S | 1        | 1177 | 0.002073 | 0.002323 | 2.156337  | 1.880891  | Q810U3   | Neurofasci Nfasc     | PLQGSQTSLDGTIKQ   |
| T | 1        | 1181 | 0.048843 | 0.085436 | 1.21646   | 0.915473  | Q810U3   | Neurofasci Nfasc     | SQTSLDGTIKQEQESD  |
| S | 1        | 343  | 0.025251 | 0.105005 | 1.68893   | 0.98754   | P70255   | Nuclear fac Nfic     | NSPSPQDSPRLSSFT   |
| S | 1        | 696  | 0.086336 | 0.027261 | -4.78294  | -6.00179  | Q8CHT1   | Ephexin-1 Ngef       | KMEDPQRSQNKDRRK   |
| S | 1        | 2369 | 0.564955 | 0.046102 | 0.402441  | 1.150743  | O88491   | Histone-lys Nsd1     | RQKERAASPQEVTPQ   |
| S | 0.984807 | 241  | 0.949395 | 0.027887 | 0.220527  | -2.594794 | Q9QZ53-2 | Protein nui Numb     | NTAPSPSSPTSPTPD   |
| S | 0.999729 | 263  | 0.058525 | 0.036879 | -0.953634 | -0.975037 | O08919   | Numb-like NumbL      | PAQPGHVSPPTATTS   |
| S | 1        | 191  | 0.026095 | 0.032024 | 1.616194  | 1.368102  | Q3B7Z2   | Oxysterol-t Osbp     | MLAESDDSGDEESVS   |
| S | 0.999695 | 44   | 0.158756 | 0.04626  | 0.65864   | 0.888673  | F8WIZ7   | Oxysterol-t Osbpl6   | HVLERTASSSTEPSV   |
| S | 0.998309 | 207  | 0.12614  | 0.030872 | 1.685089  | 2.33232   | F8WIZ7   | Oxysterol-t Osbpl6   | PATSTAESSPAANVS   |
| S | 0.998101 | 208  | 0.073361 | 0.045596 | 1.713464  | 1.769048  | F8WIZ7   | Oxysterol-t Osbpl6   | ATSTAESSPAANVS    |
| S | 1        | 952  | 0.027693 | 0.001769 | 0.682896  | 1.172846  | P97467   | Peptidyl-gh Pam      | DRVSTEGSDQEKDED   |
| S | 1        | 43   | 0.903517 | 0.01796  | 0.144985  | 1.358205  | V9GX56   | Pank2                | PLRRRASSAAPSXSSG  |
| S | 1        | 63   | 0.080581 | 0.04434  | -2.081727 | -2.232727 | Q80YV4   | Pantothen: Pank4     | HKVAKVRSFDHPGKD   |
| S | 1        | 1010 | 0.000126 | 9.59E-06 | 0.7197    | 1.08732   | F7BJK1   | Pcdh1                | QEPAGAGSPSPPEDR   |
| S | 1        | 1012 | 0.19476  | 0.023383 | 0.526303  | 0.931897  | F7BJK1   | Pcdh1                | PAGAGSPSPPEDRNT   |
| S | 1        | 1481 | 0.025583 | 0.127363 | 0.724953  | 0.397027  | Q9QYX7   | Protein pic Pclo     | EEYKQEDSQSGSEDE   |
| S | 1        | 1484 | 0.025583 | 0.127363 | 0.724953  | 0.397027  | Q9QYX7   | Protein pic Pclo     | KQEDSQSGSEDEDFI   |
| S | 0.999993 | 1772 | 0.032884 | 0.00673  | -0.739935 | -0.985157 | Q9QYX7   | Protein pic Pclo     | LSPIEDASPTTELRLQ  |
| T | 1        | 1760 | 0.032884 | 0.00673  | -0.739935 | -0.985157 | Q9QYX7   | Protein pic Pclo     | RRRERPKTPPSNLSP   |
| S | 0.995366 | 232  | 0.032862 | 0.008516 | 0.892954  | 1.12451   | P35486   | Pyruvate d Pdha1     | NRYGMGTSVERAAAS   |
| S | 0.85274  | 204  | 0.075425 | 0.031271 | 1.611545  | 1.865368  | Q8R1G6   | PDZ and LII Pdlim2   | LHSPGRPSSPRFSSL   |
| S | 0.999194 | 1166 | 0.27456  | 0.045918 | 0.633171  | 1.094905  | Q4VA53   | Sister chroi Pds5b   | SSSSNPSSPGRIKGR   |
| S | 1        | 1257 | 0.032751 | 0.095166 | 1.304911  | 0.846285  | Q4VA53   | Sister chroi Pds5b   | RGRTASDSEDEQWPE   |
| T | 1        | 205  | 0.052389 | 0.007905 | 0.716439  | 1.048427  | Q80UU9   | Membrane Pgrmc2      | GETPSEYTDDEEDTKD  |
| S | 1        | 1378 | 0.093676 | 0.032731 | 0.773373  | 0.949089  | E9Q3L2   | Pi4ka                | PDNQDTRSNDLITVG   |
| S | 1        | 495  | 0.113741 | 0.028818 | 0.975469  | 1.325097  | O70161-2 | Phosphatic Pip5k1c   | YRRRTQSSGQDGRPQ   |
| S | 1        | 946  | 0.010376 | 0.000907 | -0.999017 | -1.546033 | Q3UHE1   | Membrane Pitpnm3     | PKPERAQSQPESDKD   |
| S | 0.999998 | 24   | 0.001606 | 0.000757 | 4.431207  | 4.659751  | Q9D4F2   | Presqualen Ppapdc2   | GGSSVPGSPAHHGGGS  |
| S | 0.999884 | 750  | 0.118864 | 0.04958  | 0.803059  | 0.951985  | B2RXW8   | Ppfia1               | TTIKCETSPSSPRP    |
| S | 0.999997 | 788  | 0.00909  | 0.792331 | -1.74957  | 0.195262  | B8QI35   | Liprin-alpha: Ppfia3 | PPGRESVSLAGTPSD   |
| S | 0.999884 | 701  | 0.004511 | 0.005331 | 1.301647  | 1.120473  | B8QI36   | Ppfia4               | ATIKCETSPSSPRP    |
| S | 0.999676 | 445  | 0.041006 | 0.366739 | 0.726542  | 0.27613   | Q9DBR7   | Protein phr Ppp1r12a | LGLRKTGSYGALAEI   |
| S | 1        | 6    | 0.250592 | 0.022983 | 0.529474  | 1.057161  | Q9ERT9   | Protein phr Ppp1r1a  | __MEPDNSPRKIQFT   |
| S | 0.999855 | 746  | 0.115001 | 0.042059 | 0.749105  | 0.920242  | Q8R3Q2   | Serine/thre Ppp6r2   | ETGPRCSPVDM DHS   |
| S | 1        | 329  | 0.011228 | 0.136093 | 0.908583  | 0.39418   | P16054   | Protein kin Prkce    | KLAAGAESPPQASGN   |
| T | 1        | 455  | 0.823611 | 0.018481 | -0.16111  | -1.068173 | Q8CCF0   | U4/U6 sma Prpf31     | TASSVAFTPLQGLIE   |
| S | 1        | 292  | 0.004628 | 0.00433  | -0.962443 | -0.873997 | Q61136   | Serine/thre Prpf4b   | SRDRSKSKSPVDLDR   |
| S | 1        | 294  | 0.004628 | 0.00433  | -0.962443 | -0.873997 | Q61136   | Serine/thre Prpf4b   | DRSKSKSPVDLDRDK   |
| S | 1        | 387  | 0.239031 | 0.033336 | 0.645217  | 1.139956  | F8WHT3   | Protein PRI Prrc2b   | YSEKLFSDDEDEED    |
| S | 1        | 254  | 0.043893 | 0.20124  | 0.936815  | 0.495648  | E9PUL5   | Proline-ricl Prrt2   | GSLSRHPSSQLAGPG   |
| S | 1        | 129  | 0.017258 | 0.872168 | 1.019035  | 0.100568  | Q99JF8   | PC4 and SF Psip1     | TDQEEKASNEVDTKA   |
| S | 1        | 250  | 0.047666 | 0.835969 | -2.941286 | -0.439797 | O70435   | Proteasom Psma3      | SLKEEDESDDDNM__   |
| S | 1        | 256  | 0.047176 | 0.873019 | -1.466184 | -0.189039 | O35226   | 26S protea Psmd4     | ATPGTEDSDDALLK M  |
| S | 0.999979 | 645  | 0.169785 | 0.03073  | 0.776914  | 1.207544  | B9EKR1   | Receptor-t Ptpzr1    | APEDSAPSGSEESLK   |

|   |          |      |          |          |           |           |           |                       |                  |
|---|----------|------|----------|----------|-----------|-----------|-----------|-----------------------|------------------|
| S | 0.999876 | 647  | 0.169785 | 0.03073  | 0.776914  | 1.207544  | B9EKR1    | Receptor-t Ptprz1     | EDSAPSGSEESLKDP  |
| S | 0.999999 | 393  | 0.549884 | 0.014241 | -0.379248 | -1.442947 | Q80TM6    | R3H domai R3hdm2      | SILTRGDSIGSGKGG  |
| S | 1        | 29   | 0.017828 | 0.089086 | -1.367574 | -0.77264  | Q62172    | RalA-bindir Ralbp1    | SGLTRTPSSEIEIPT  |
| T | 1        | 27   | 0.00497  | 0.441369 | -2.798217 | -0.551836 | Q62172    | RalA-bindir Ralbp1    | HGSLTRTPSSEIEIS  |
| S | 0.995153 | 708  | 0.215005 | 0.046673 | 2.52766   | 3.867172  | Q5SVL6    | Rap1 GTPa Rap1gap2    | DKLSHASSSAGH___  |
| S | 0.999983 | 1022 | 0.016304 | 0.019621 | 0.995346  | 0.849367  | Q8CHG7    | Rap guanin Rapgef2    | KPVKSETSPVAPRAG  |
| S | 0.990471 | 1119 | 0.040245 | 0.032373 | 5.015159  | 4.765237  | Q8CHG7    | Rap guanin Rapgef2    | QLSSPPTSPQSSPRK  |
| S | 1        | 1295 | 0.127542 | 0.047993 | 1.419581  | 1.743021  | P97868-2  | E3 ubiquiti Rbbp6     | WDKDDFESEEDVKT   |
| S | 1        | 672  | 0.123947 | 0.010766 | 3.013862  | 5.423513  | B2RY56    | RNA-bindir Rbm25      | LKLGASNSPGQPNSV  |
| S | 1        | 42   | 0.098363 | 0.013194 | 0.531291  | 0.838593  | A0A023T67 | RNA-bindir RBM8       | RKGRGFGSEEGSRAR  |
| S | 0.999963 | 506  | 0.069973 | 0.038264 | 1.330172  | 1.422129  | Q3UYI5    | Ral guanin Rgl3       | VIPEPAASCPSPRI   |
| S | 0.997274 | 1133 | 0.078515 | 0.045948 | 1.770653  | 1.86401   | D9HP81    | Regulating Rims2      | RSHPRTGSVQTSPTS  |
| S | 0.999721 | 1137 | 0.063097 | 0.035732 | 1.686957  | 1.780314  | D9HP81    | Regulating Rims2      | RTGSGVQTSPTSPTGT |
| S | 1        | 321  | 1.17E-05 | 9.4E-06  | 4.11275   | 3.848602  | Q3V3V9-2  | Leucine-ric Rltpr     | AGPSARGSPSPAAPG  |
| S | 0.999996 | 23   | 0.210179 | 0.031566 | 0.62484   | 1.05599   | P62858    | 40S ribosor Rps28;Gm1 | KVLGRTGSQGGQCTQV |
| S | 0.999834 | 360  | 0.048608 | 0.906976 | 2.063966  | -0.226284 | Q9WUT3    | Ribosomal Rps6ka2     | TARPTDTPSGVPPSA  |
| S | 1        | 434  | 0.080533 | 0.037301 | 1.124553  | 1.266344  | P56183    | Ribosomal Rrp1        | PQNKEAGSEAESSSA  |
| S | 0.999999 | 6    | 0.010052 | 0.002004 | 1.886953  | 2.440746  | Q9DBU6    | Serine/Argj Rsrc1     | ___MGRRSSDTEESR  |
| S | 1        | 350  | 0.002946 | 0.000973 | -3.408174 | -3.883392 | Q8K0T0    | Reticulon-1 Rtn1      | AESQKGKGSVEDELI  |
| S | 0.999986 | 836  | 0.919761 | 0.021052 | -0.380705 | 3.781743  | Q99P72    | Reticulon-4 Rtn4      | MKESETFSDSSPIEI  |
| S | 0.958274 | 838  | 0.446041 | 0.004712 | 0.913695  | 3.781743  | Q99P72    | Reticulon-4 Rtn4      | ESETFSDSSPIEIID  |
| T | 0.938899 | 834  | 0.000693 | 3.91E-06 | 1.807582  | 4.67563   | Q99P72    | Reticulon-4 Rtn4      | DKMKESETFSDSSPI  |
| T | 0.999945 | 5    | 0.024316 | 0.457178 | 1.71399   | 0.484642  | Q9D394    | Protein RU Rufy3      | ___MSALTPPTDMPT  |
| S | 1        | 799  | 0.037121 | 0.019164 | 1.024143  | -1.09255  | Q9QX96    | Sal-like pro Sall2    | AISVRGDSEEVSGAE  |
| S | 0.999998 | 555  | 0.52106  | 0.04909  | -0.298474 | -0.77562  | A2APX8    | Sodium ch; Scn1a      | RYSSPHQSLLSIRGS  |
| S | 1        | 554  | 0.032187 | 0.095884 | -3.741801 | -2.409074 | B1AWN6    | Sodium ch; Scn2a1     | TYEKRFSSPHQSLLS  |
| T | 1        | 193  | 0.325707 | 0.007541 | -1.64453  | -4.967679 | Q56A07    | Sodium ch; Scn2b      | KAEQKQLSTDDLKTEE |
| S | 0.864026 | 288  | 0.264499 | 0.005305 | -0.61499  | 1.802794  | Q63918    | Serum dep Sdpr        | KASSGKSSPQKVSPL  |
| S | 0.884937 | 1238 | 0.046221 | 0.024011 | 0.821175  | 0.879353  | A2AIX1    | Sec16a                | YSEPERPSSRASHYS  |
| S | 0.998603 | 17   | 0.009252 | 0.046394 | 1.722061  | 1.012656  | Q9CQS8    | Protein tra Sec61b;Gm | NVGSSSGRSPSKAVAA |
| T | 1        | 158  | 0.010519 | 0.126718 | 0.708967  | 0.31089   | Q8BU14    | Translocati Sec62     | KKEETPGTPKKKETK  |
| T | 1        | 816  | 0.01904  | 0.555761 | 1.915985  | 0.428929  | O09126    | Semaphori Sema4d      | ALDTGYETEQDTITS  |
| S | 0.5      | 126  | 0.016237 | 0.004522 | 1.417563  | 1.7198    | Q91ZM2-6  | SH2B adap Sh2b1       | AVLGPSRSSEDLAGP  |
| S | 0.5      | 127  | 0.066829 | 0.021789 | 1.334603  | 1.63684   | Q91ZM2-6  | SH2B adap Sh2b1       | VLGSPRSSEDLAGPL  |
| S | 1        | 400  | 0.034811 | 0.297542 | -2.637194 | -1.081447 | Q8R3V5    | Endophilin Sh3glb2    | VTYLELLS_____    |
| S | 1        | 8    | 0.028591 | 0.97304  | -3.281628 | -0.162317 | A2ALU4-2  | Protein Shr Shroom2   | METSRSPPSQFAPQK  |
| S | 1        | 258  | 0.023145 | 0.905707 | -1.447778 | 0.130354  | Q8C0T5    | Signal-indu Sipa11    | GGKGGSGFLDVIDGP  |
| S | 1        | 1249 | 0.156512 | 0.03852  | -0.713661 | -1.008733 | Q8C0T5    | Signal-indu Sipa11    | QDPVVHLSPNKQGH   |
| S | 1        | 392  | 0.000536 | 0.001512 | -1.336358 | -0.957471 | Q8C108    | SLAIN moti Slain2     | RLQQPRLSLQGHPTD  |
| S | 0.997694 | 74   | 0.006613 | 0.003585 | -4.527584 | -4.65963  | P55012    | Solute carr Slc12a2   | RPLGPTPSQSRFQVD  |
| S | 0.916064 | 76   | 0.01078  | 0.003205 | 3.217182  | 3.813557  | P55012    | Solute carr Slc12a2   | LGPTPSQSRFQVDPV  |
| S | 0.99424  | 291  | 0.016141 | 0.018318 | -1.824174 | -1.580217 | E9Q2R3    | Slc19a2               | KQEDPSSSPQASTS_  |
| S | 1        | 21   | 0.027573 | 0.044231 | 1.974984  | 1.550043  | P43006    | Excitatory ; Slc1a2   | VEVRMHDSLHSSDEP  |
| S | 1        | 24   | 0.015287 | 0.029336 | 1.055554  | 0.797421  | P43006    | Excitatory ; Slc1a2   | RMHDSLHSSDEPKHR  |
| S | 0.993286 | 312  | 0.019792 | 0.084464 | 0.978804  | 0.578016  | Q8BUN9    | Slc24a2               | VPEAQAKSPTAGDKD  |
| S | 1        | 429  | 0.043867 | 0.941648 | -2.852725 | -0.236864 | Q921R7    | Probable U Slc35a5    | ERLTKLKSDDSDDDT  |
| S | 0.999997 | 89   | 0.034517 | 0.035385 | 1.295621  | 1.150911  | F8VQC9    | Anion exch Slc4a7     | DKEDGRESPTYDTPS  |
| S | 1        | 682  | 0.004653 | 0.001858 | 3.079379  | 3.38113   | Q8BJI1    | Sodium-de Slc6a17     | FILSKVPSEAPSPMP  |
| S | 1        | 686  | 0.089075 | 0.037881 | 1.825024  | 2.115048  | Q8BJI1    | Sodium-de Slc6a17     | KVPSEAPSPMPTHRS  |
| S | 0.995378 | 790  | 0.006966 | 0.954481 | -1.588809 | -0.072394 | Q61165    | Sodium/hy Slc9a1      | FTPSSSDSPSSQRIQ  |
| S | 0.999996 | 609  | 0.061868 | 0.024465 | 3.075957  | 3.574156  | Q61165    | Sodium/hy Slc9a1      | PSAVSTVSMQNIHPK  |
| S | 1        | 603  | 0.273724 | 0.009755 | 0.441051  | 1.14021   | Q61165    | Sodium/hy Slc9a1      | GGMGKIPSAVSTVSM  |
| S | 0.999559 | 700  | 3.52E-06 | 2.05E-06 | 2.955     | 2.947144  | A1L3P4    | Sodium/hy Slc9a6      | SLDDTRHSPA_____  |
| S | 1        | 32   | 0.303594 | 0.031817 | 0.363688  | 0.735254  | Q9DB90    | Protein SM Smg9       | SSGPQNLGSGGGGRER |
| S | 1        | 28   | 0.048617 | 0.385271 | -1.107329 | -0.428177 | P97801    | Survival mc Smn1      | GTGQSDSDDIWDDTA  |
| S | 1        | 289  | 0.078795 | 0.014602 | 0.707611  | 1.012067  | Q9JY3     | Sphingomy Smpd3       | QRDGDGSLGSPSAS   |
| S | 0.9999   | 292  | 0.078795 | 0.014602 | 0.707611  | 1.012067  | Q9JY3     | Sphingomy Smpd3       | GDSGSLGSPSASRES  |
| S | 0.667127 | 304  | 0.17935  | 0.017123 | -1.044748 | -1.93535  | E9Q9A3    | Snap91                | PSPLSKSSPATTVTS  |
| S | 0.635853 | 306  | 0.17935  | 0.017123 | -1.044748 | -1.93535  | Q61548    | Clathrin co Snap91    | PSPLSKSSPATTVTS  |
| S | 1        | 75   | 0.042052 | 0.325039 | -0.738142 | -0.30381  | Q61235    | Beta-2-syn Sntb2      | NRGLGPPSPAPPARG  |
| S | 0.963381 | 1155 | 0.043611 | 0.36749  | -1.244163 | -0.480605 | Q9JLC4    | VPS10 dorr Sorcs1     | RPATPPSSPKRGSAG  |

|   |          |      |          |          |           |           |        |              |            |                  |
|---|----------|------|----------|----------|-----------|-----------|--------|--------------|------------|------------------|
| S | 0.999913 | 360  | 0.040187 | 0.085491 | -1.087534 | -0.773723 | Q5SXY1 | Cytospin-B   | Specc1     | KGSPTGSSPNNASEL  |
| S | 1        | 126  | 0.167426 | 0.041635 | 0.611033  | 0.868027  | Q8R1X6 | Spartin      | Spg20      | PKDACKKSPEQESVS  |
| S | 0.996575 | 379  | 0.011075 | 0.451186 | -2.592594 | -0.607367 | Q9JIA7 | Sphingosin   | Sphk2      | PAPAATHSPLHRSVS  |
| S | 0.853856 | 100  | 0.038925 | 0.209846 | 2.282332  | 1.145655  | D3YTL8 | Protein spi  | Spire1     | MEKGDDESSTDLEDLK |
| S | 0.991008 | 2339 | 0.001697 | 0.001664 | -0.980902 | -0.881144 | Q62261 | Spectrin be  | Sptbn1     | VVTITSESSPGKREK  |
| T | 1        | 2354 | 0.205079 | 0.01564  | 0.815401  | 1.636793  | Q68FG2 |              | Sptbn2     | RGLTRAMTMPVVSQP  |
| T | 0.993611 | 658  | 0.794486 | 0.011286 | 0.733228  | -5.020148 | B1AQX9 |              | Srcin1     | GSKSSGATPVSGPPP  |
| S | 1        | 858  | 0.001982 | 0.673268 | -3.613575 | 0.380513  | Q812A2 | SLIT-ROBO    | Srgap3     | MGRVRLRSDGAAIPR  |
| S | 0.999276 | 560  | 0.003467 | 0.747522 | 3.320903  | 0.334446  | E9Q740 | Signal reco  | Srp72      | DASKAVSSPPTSPRP  |
| S | 1        | 412  | 0.528498 | 0.03308  | -1.337144 | -3.935564 | E9PUK6 | Serine/argi  | Srrm1      | PPPKTRHSPTPQQSN  |
| T | 0.999995 | 414  | 0.695047 | 0.049377 | -1.337144 | -4.835455 | E9PUK6 | Serine/argi  | Srrm1      | PKTRHSPTPQQSNRT  |
| S | 0.995074 | 766  | 0.023692 | 0.024199 | -3.351341 | -2.980889 | E9PUK6 | Serine/argi  | Srrm1      | PQSVRRVSSRSVSG   |
| S | 0.999408 | 454  | 0.012846 | 0.061235 | 1.290354  | 0.756674  | Q8BTI8 | Serine/argi  | Srrm2      | SRREISSPTSKNRS   |
| S | 1        | 1305 | 0.049604 | 0.111491 | 4.102524  | 2.832893  | Q8BTI8 | Serine/argi  | Srrm2      | SEVNTGFSPVEKKEEL |
| S | 1        | 1813 | 0.001863 | 0.491528 | -3.511005 | 0.510574  | Q8BTI8 | Serine/argi  | Srrm2      | KRSRRTSPAPWKRS   |
| S | 0.999786 | 3    | 0.026627 | 0.04795  | -0.705758 | -0.536123 | E9Q6E5 |              | Srsf11     | ____MSSPPAPGTA   |
| S | 1        | 224  | 0.007615 | 0.002403 | 1.326018  | 1.542467  | Q8C8K3 | Serine/argi  | Srsf12     | PHGRHCDSIARSPCK  |
| S | 1        | 228  | 0.007615 | 0.002403 | 1.326018  | 1.542467  | Q8C8K3 | Serine/argi  | Srsf12     | HCDSIARSPCKSPRA  |
| S | 1        | 212  | 0.055037 | 0.012378 | 0.557669  | 0.74344   | Q62093 | Serine/argi  | Srsf2      | RSKSPKSPPEEGAV   |
| S | 1        | 291  | 0.023346 | 0.784013 | -1.673795 | -0.242    | Q8VE97 | Serine/argi  | Srsf4      | AGKAKSHSPSRHDSK  |
| S | 1        | 297  | 0.023346 | 0.784013 | -1.673795 | -0.242    | Q8VE97 | Serine/argi  | Srsf4      | HSPSRHDSKRSRSQ   |
| S | 0.948957 | 17   | 0.040257 | 0.671881 | -3.389034 | -0.742834 | Q8QZV4 | Serine/thre  | Stk32c     | SSAAAPSSPPPGRA   |
| S | 1        | 139  | 0.091323 | 0.043942 | 1.468931  | 1.645921  | Q9ER00 | Syntaxin-1;  | Stx12      | IARARAGSRLSAEDR  |
| S | 1        | 792  | 0.005125 | 0.003176 | 3.233757  | 3.223814  | Q5DQR4 | Syntaxin-bi  | Stxbp5l    | PPFRKAQSAACMEIS  |
| S | 0.990946 | 770  | 0.287338 | 0.025388 | 1.189612  | 2.480573  | Q5DQR4 | Syntaxin-bi  | Stxbp5l    | CSSGKRLSSADVSKV  |
| S | 0.999982 | 597  | 0.890163 | 0.004213 | 0.239292  | -2.953151 | Q5DQR4 | Syntaxin-bi  | Stxbp5l    | SGSTNTVSSSEGVTKD |
| S | 0.992883 | 733  | 0.017344 | 0.016877 | 1.168694  | 1.052553  | Q8CH09 | SURP and C   | Sugp2      | KPCQPQSSPGALGPS  |
| S | 1        | 461  | 0.031875 | 0.023862 | 3.854897  | 3.725494  | Q8JZP2 | Synapsin-3   | Syn3       | SPSQQLRSPQGGQPV  |
| S | 1        | 461  | 0.037249 | 0.057265 | 2.370246  | 1.871993  | Q8JZP2 | Synapsin-3   | Syn3       | SPSQQLRSPQGGQPV  |
| S | 1        | 22   | 0.016337 | 0.016811 | 0.867265  | 0.770127  | Q8BHL3 | TBC1 domε    | Tbc1d10b   | HGAPAAPSPPPRGRSR |
| S | 1        | 952  | 0.014562 | 0.003849 | 4.124404  | 5.050947  | A3KGB4 | TBC1 domε    | Tbc1d8b    | ETESGRNSPEKKGK   |
| S | 1        | 100  | 0.120572 | 0.031839 | 0.527424  | 0.71211   | P10711 | Transcripti  | Tcea1      | PAISSQNSPEAREES  |
| S | 0.997481 | 23   | 6.04E-06 | 4.04E-06 | -1.6967   | -1.645883 | Q8CCT4 | Transcripti  | Tcea15     | GRAEDEGSTEEGGKA  |
| S | 1        | 794  | 0.66961  | 0.045531 | -0.609679 | -2.138292 | H3BL37 | Treacle prc  | Tcof1      | ASAPAKESPKKGHP   |
| S | 1        | 320  | 0.073847 | 0.0303   | 0.908155  | 1.05312   | Q569Z6 | Thyroid ho   | Thrap3     | KKSPVKGSPPATGSA  |
| S | 1        | 86   | 0.01992  | 0.145759 | -3.382282 | -1.64947  | Q99J36 | THUMP do     | Thumpd1    | IDKQQQPSGSEGEDD  |
| S | 1        | 88   | 0.01992  | 0.145759 | -3.382282 | -1.64947  | Q99J36 | THUMP do     | Thumpd1    | KDQQQPSGSEGEDDDA |
| S | 1        | 175  | 0.004908 | 0.00246  | 3.577764  | 3.738442  | P39447 | Tight juncti | Tjp1       | SPRRDRRSVASSQPA  |
| S | 1        | 178  | 0.003641 | 0.001813 | 3.6378    | 3.798478  | P39447 | Tight juncti | Tjp1       | SDRRSVASSQPAKPT  |
| S | 1        | 378  | 0.05166  | 0.045633 | 1.557311  | 1.444215  | Q9ZOU1 | Tight juncti | Tjp2       | NIPALNDSQSEVEDI  |
| S | 1        | 56   | 0.248148 | 0.012279 | -1.072995 | -2.497901 | Q8C996 | Transmeml    | Tmem163    | QRPRISESGQFSDGL  |
| S | 1        | 56   | 0.014732 | 0.048647 | -1.202137 | -0.781017 | Q8C996 | Transmeml    | Tmem163    | RQPRISESGQFSDGL  |
| S | 1        | 60   | 0.014732 | 0.048647 | -1.202137 | -0.781017 | Q8C996 | Transmeml    | Tmem163    | ISESGQFSDGLEDRG  |
| S | 0.999543 | 101  | 0.017269 | 0.055604 | 1.489684  | 0.968224  | D3Z2D8 | CSC1-like p  | Tmem63b    | ERLTVSSSVDFDQR   |
| S | 1        | 678  | 0.331707 | 0.049769 | 0.49704   | 0.931124  | E9PUL9 | Traf2 and T  | Tnik       | GSQPTRASNPDLRRT  |
| S | 0.999976 | 462  | 0.037223 | 0.237426 | 2.7525    | 1.289074  | O88746 | Target of N  | Tom1       | DRLPNLASPSAEGPP  |
| S | 1        | 1539 | 0.003418 | 0.002313 | 2.557122  | 2.495086  | Q64511 | DNA topoi:   | Top2b      | KKRKASGSENEGSDYN |
| S | 1        | 1453 | 0.012003 | 0.931834 | -0.892535 | 0.057235  | Q64511 | DNA topoi:   | Top2b      | DDSAKFDSDNEEDTAS |
| T | 0.978984 | 176  | 0.667519 | 0.036602 | -0.4414   | -1.639685 | Q8BU11 | TOX high r   | Tox4       | PEDRLSTTPSPTNSL  |
| S | 0.999755 | 479  | 0.01362  | 0.408634 | -2.673114 | -0.707839 | Q8CG79 | Apoptosis-;  | Tp53bp2;Ti | GTLRKNQSSIEDILRD |
| S | 1        | 14   | 0.019192 | 0.005746 | 1.009073  | 1.208827  | P62996 | Transformε   | Tra2b      | QNYGERERSASRSRG  |
| S | 0.999206 | 23   | 0.019105 | 0.148421 | -1.312583 | -0.628899 | Q62318 | Transcripti  | Trim28     | AASAASGSPGSGEGS  |
| S | 1        | 323  | 0.100491 | 0.019082 | 3.352622  | 4.859245  | Q8C1Z8 | tRNA meth    | Trmt10a    | DEQGGQQSSPVLQ_   |
| S | 1        | 324  | 0.106642 | 0.015899 | 2.742114  | 4.248738  | Q8C1Z8 | tRNA meth    | Trmt10a    | DEQGGQQSSPVLQ_   |
| S | 1        | 1794 | 0.529298 | 0.025234 | -0.314787 | 0.997897  | O88196 | E3 ubiquiti  | Ttc3       | LKGASQVSPSEQSPE  |
| S | 1        | 678  | 0.014235 | 0.064957 | -1.213417 | -0.716753 | E9Q6P5 |              | Ttc7b      | ALSEVASSLQSSAPK  |
| S | 0.998285 | 449  | 0.043371 | 0.394147 | -0.780482 | -0.287633 | Q9D3A9 | Protein twε  | Ttyh1      | RFVQWQSSI_       |
| S | 0.999981 | 167  | 0.271132 | 0.006459 | 0.492458  | 1.396674  | Q9Z0P5 | Twinfilin-2  | Twf2       | NEVKTEISVESKHQT  |
| S | 1        | 835  | 0.019343 | 0.075416 | 0.819088  | 0.498791  | Q02053 | Ubiquitin-li | Uba1       | ELKATLPSDPKLPGF  |
| S | 0.980783 | 622  | 0.427471 | 0.00275  | -0.184071 | -0.833658 | O70405 | Serine/thre  | Ulk1       | PLPILGSPTKAGPS   |
| S | 0.980281 | 715  | 0.0101   | 0.003765 | 1.658435  | 1.866338  | O70405 | Serine/thre  | Ulk1       | TQASDSGSDLSLQEK  |

|   |          |      |          |          |           |           |        |             |        |                  |
|---|----------|------|----------|----------|-----------|-----------|--------|-------------|--------|------------------|
| S | 0.999997 | 255  | 0.122554 | 0.029918 | 0.856377  | 1.182907  | Q4KUS2 | Protein unc | Unc13a | FSEPRALSPTGSSRY  |
| S | 0.998234 | 259  | 0.122554 | 0.029918 | 0.856377  | 1.182907  | Q4KUS2 | Protein unc | Unc13a | RALSPTGSSRYASSG  |
| S | 0.999959 | 260  | 0.13882  | 0.039935 | 0.856377  | 1.14394   | Q4KUS2 | Protein unc | Unc13a | ALSPTGSSRYASSGE  |
| S | 0.97941  | 49   | 0.038718 | 0.002488 | 0.657245  | 1.147852  | E9Q6Y8 | Ubiquitin c | Usp31  | PGPAAPSSPSSARSV  |
| S | 0.999937 | 1103 | 0.026113 | 0.070392 | 1.292843  | 0.870111  | E9Q6Y8 | Ubiquitin c | Usp31  | QESMSSSPQKQKSA   |
| S | 0.936641 | 796  | 0.007131 | 0.015277 | 0.969396  | 0.721203  | E9Q6Y8 | Ubiquitin c | Usp31  | SKQASVTSAASSRRT  |
| S | 0.982593 | 997  | 0.532237 | 0.029636 | -0.601302 | -1.835443 | Q8CDG3 | Deubiquitin | Vcpip1 | TTRSRESSPSHGLLK  |
| S | 0.999341 | 783  | 0.383321 | 0.005407 | 0.275546  | -0.993709 | Q9EQH3 | Vacuolar p  | Vps35  | HLRSRRESPESEGPI  |
| S | 0.999998 | 235  | 0.028912 | 0.510162 | -1.614553 | 0.436754  | Q8VHI6 | Wiskott-Al  | Wasf3  | ASSEGLSPDTRSHT   |
| S | 0.998169 | 205  | 0.012697 | 0.667699 | -4.275311 | -0.69879  | Q8K1X1 | WD repeat   | Wdr11  | GKKVYISSPHSSPAH  |
| S | 0.919614 | 208  | 0.044933 | 0.60461  | -4.718889 | -1.218596 | Q8K1X1 | WD repeat   | Wdr11  | VYISSPHSSPAHNKL  |
| S | 0.996606 | 346  | 0.998913 | 0.046684 | 0.0563    | 3.998395  | P0C7L0 | WAS/WASI    | Wipf3  | PPPLPKSPSFQTQK   |
| S | 1        | 1090 | 0.045367 | 0.694538 | -3.518856 | -0.760393 | E9Q784 |             | Zc3h13 | RRRSKGDSDVSDDEEA |
